# Supplementary material for: Novel Potent and Selective DPP-4 Inhibitors: Design, Synthesis and Molecular Docking Study of Dihydropyrimidine Phthalimide Hybrids
Source: PubMed Central journal article supplement (PMC7918823; doi:10.3390/ph14020144), 2021-02-11

# IR Spectroscopy:

Figure S1: IR Spectroscopy of Compound 5a

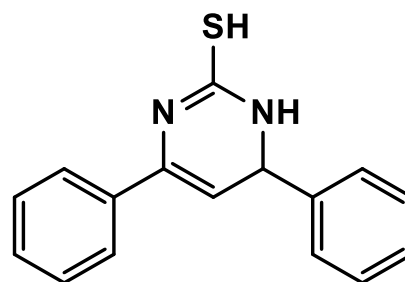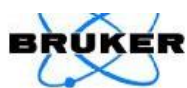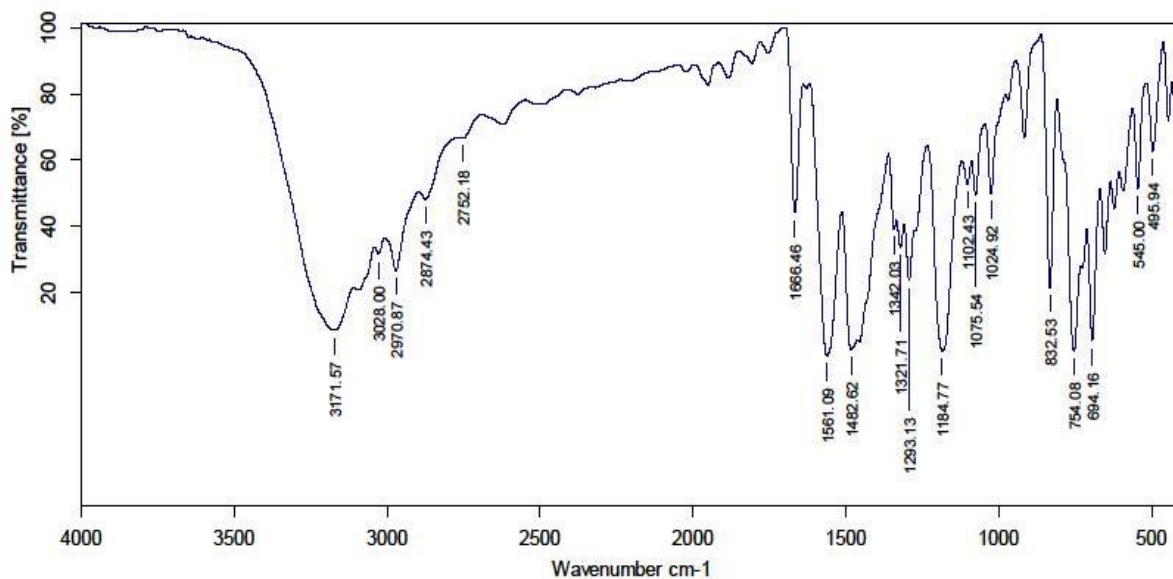

Figure S2: IR Spectroscopy of Compound 5b

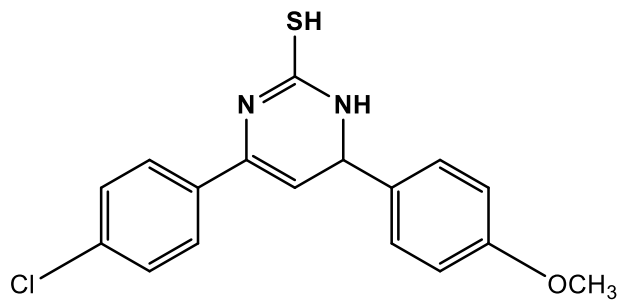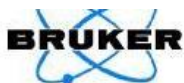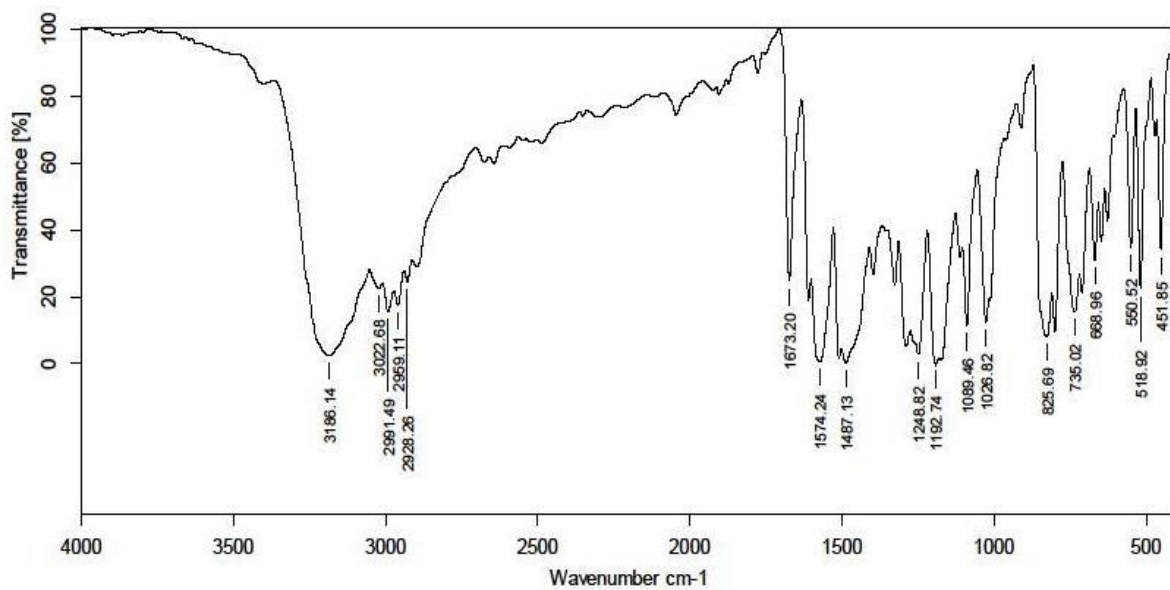

Figure S3: IR Spectroscopy of Compound 5c

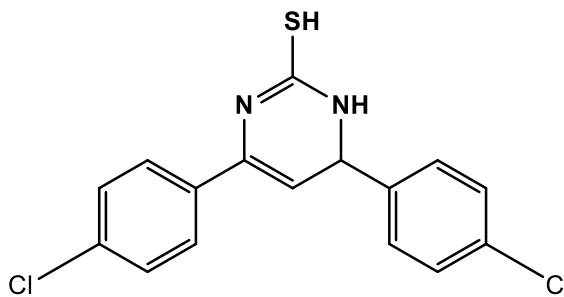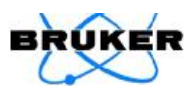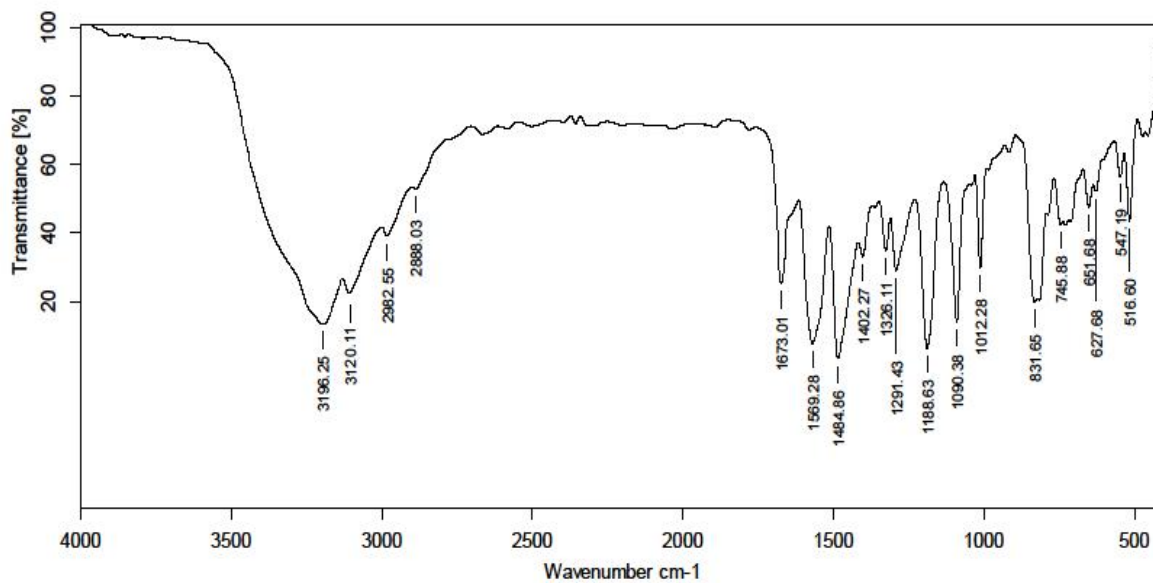

Figure S4: IR Spectroscopy of Compound 5d

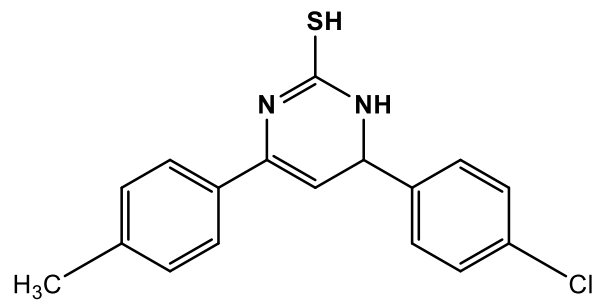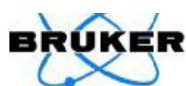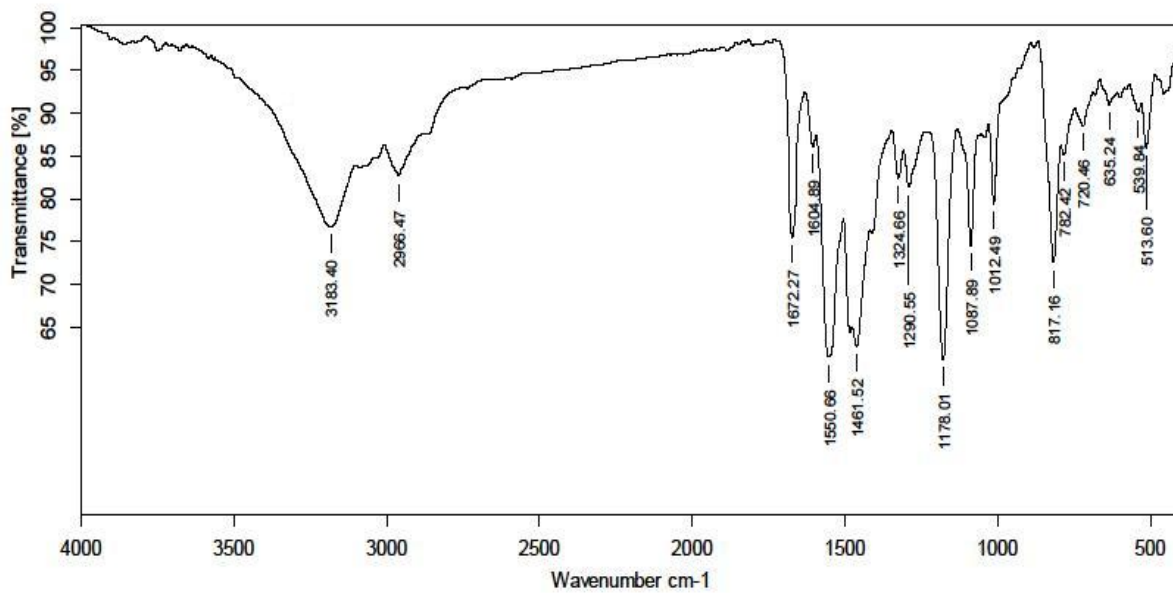

Figure S5: IR Spectroscopy of Compound 5e

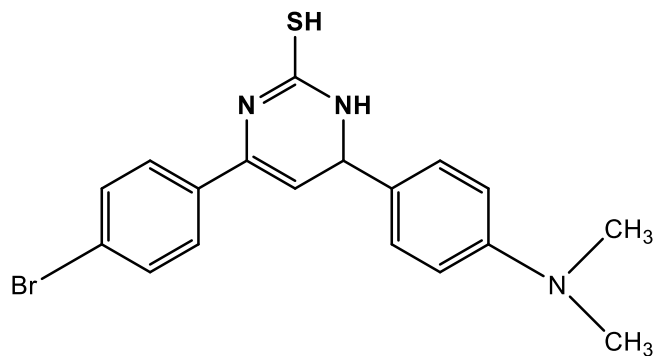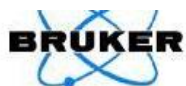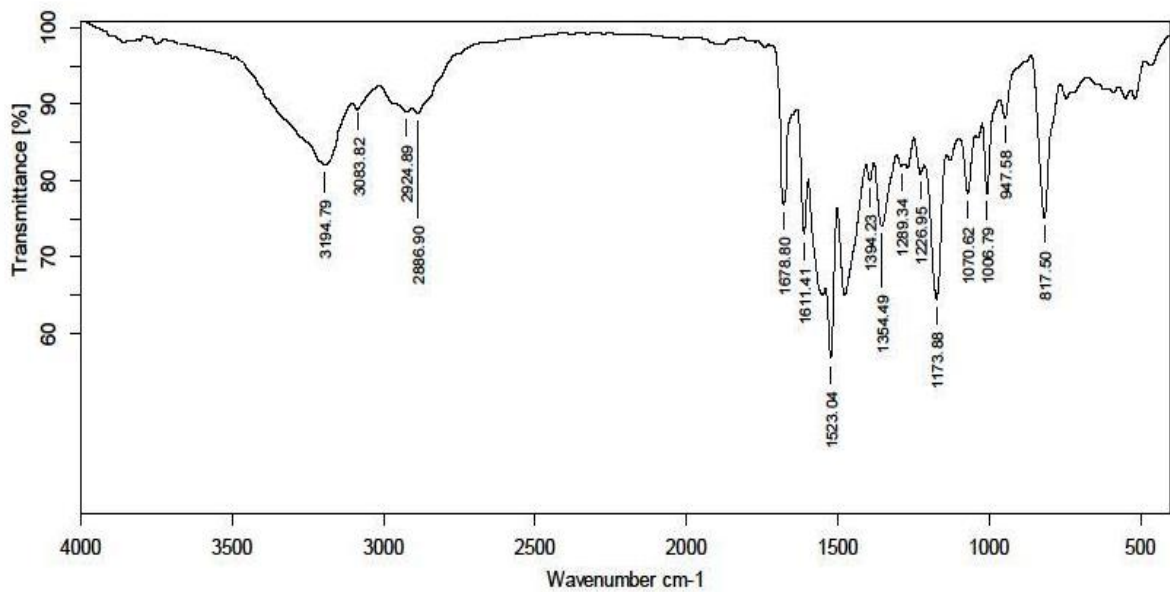

Figure S6: IR Spectroscopy of Compound 5f

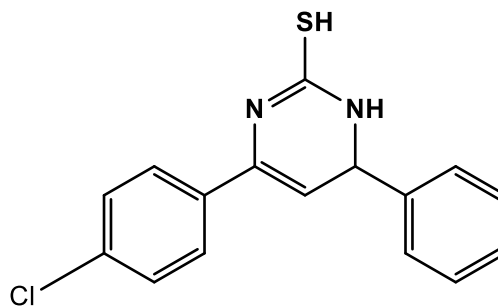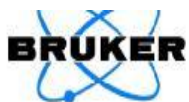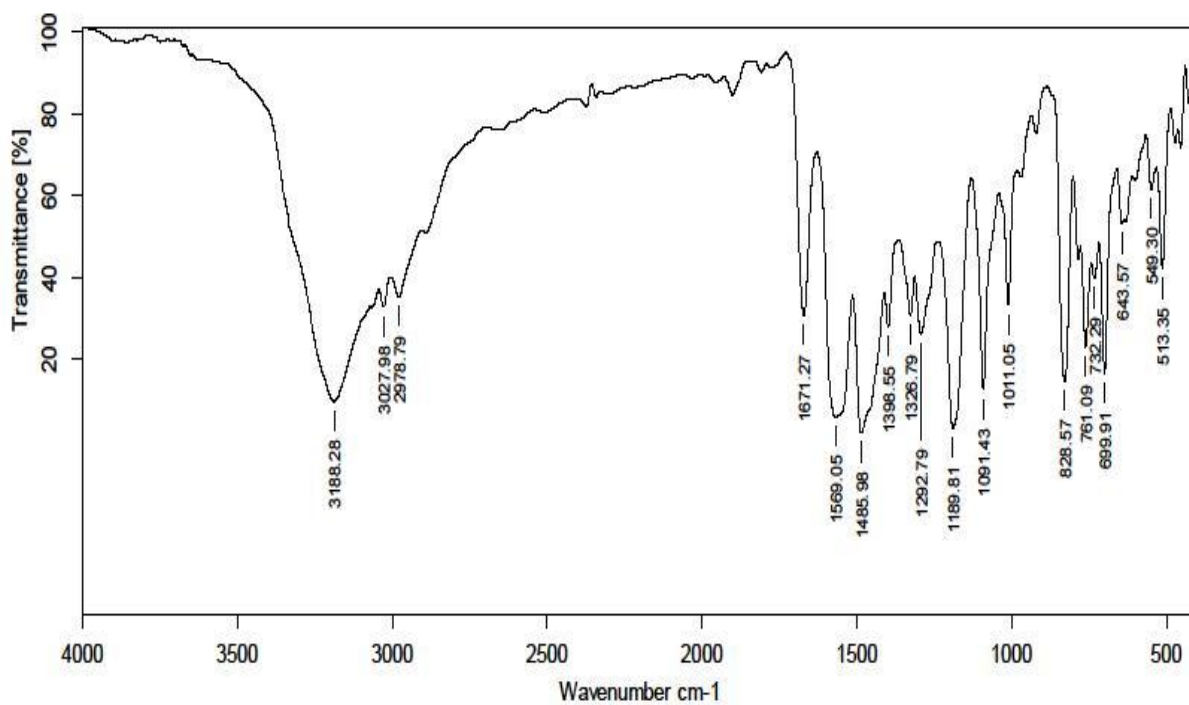

Figure S7: IR Spectroscopy of Compound 5g

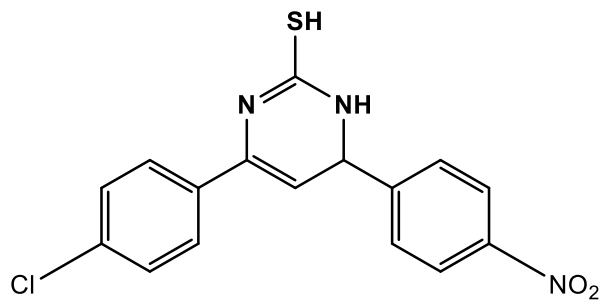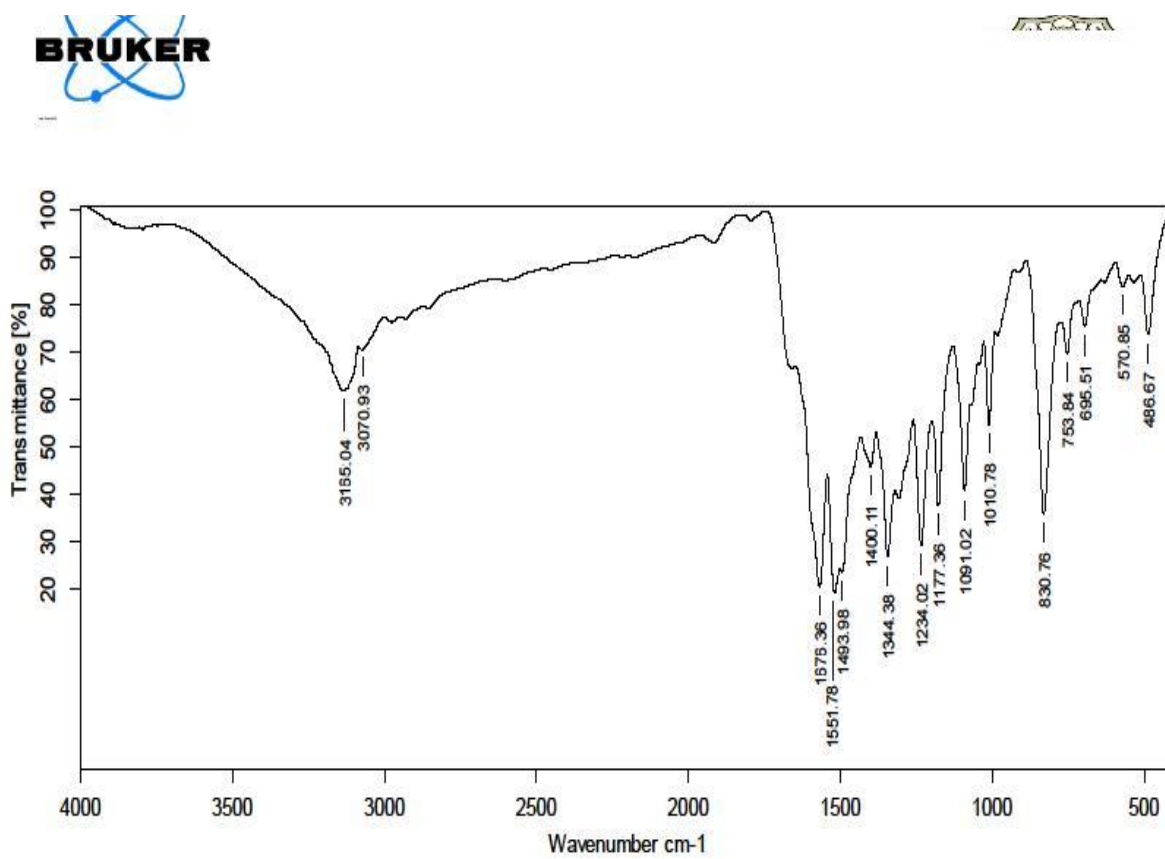

Figure S8: IR Spectroscopy of Compound 5h

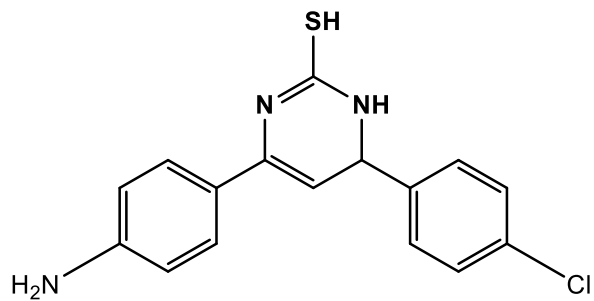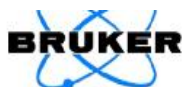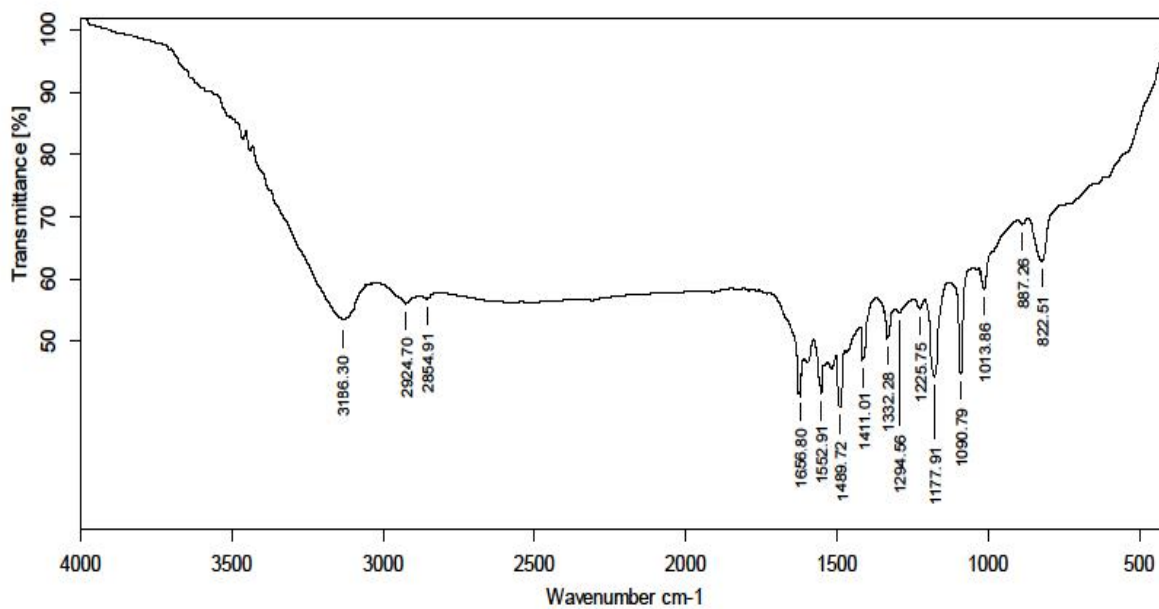



Figure S9: IR Spectroscopy of Compound 5i

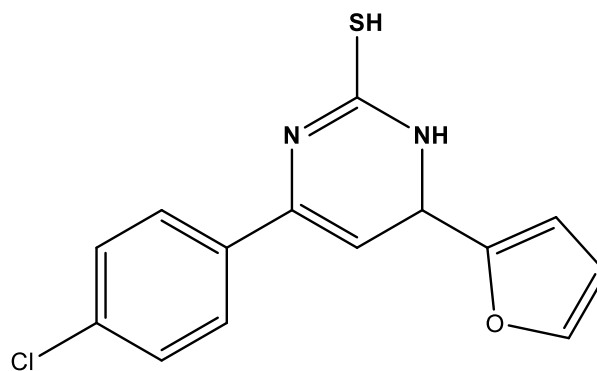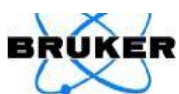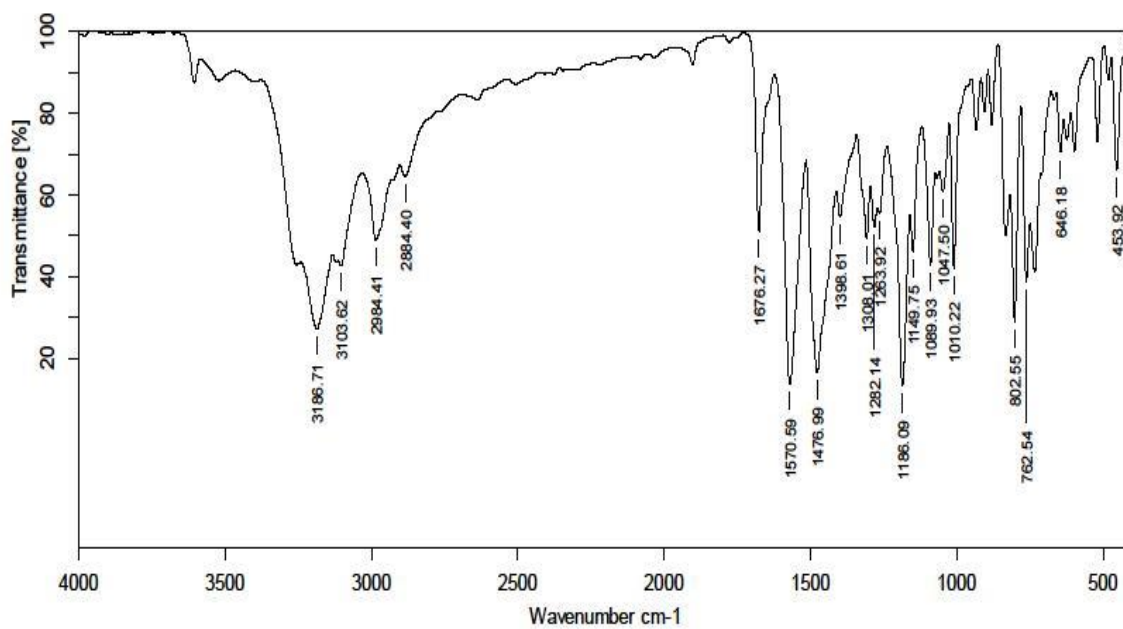

Figure S10: IR Spectroscopy of Compound 5j

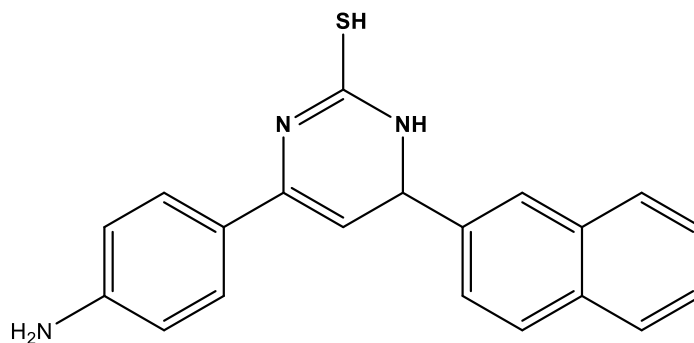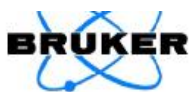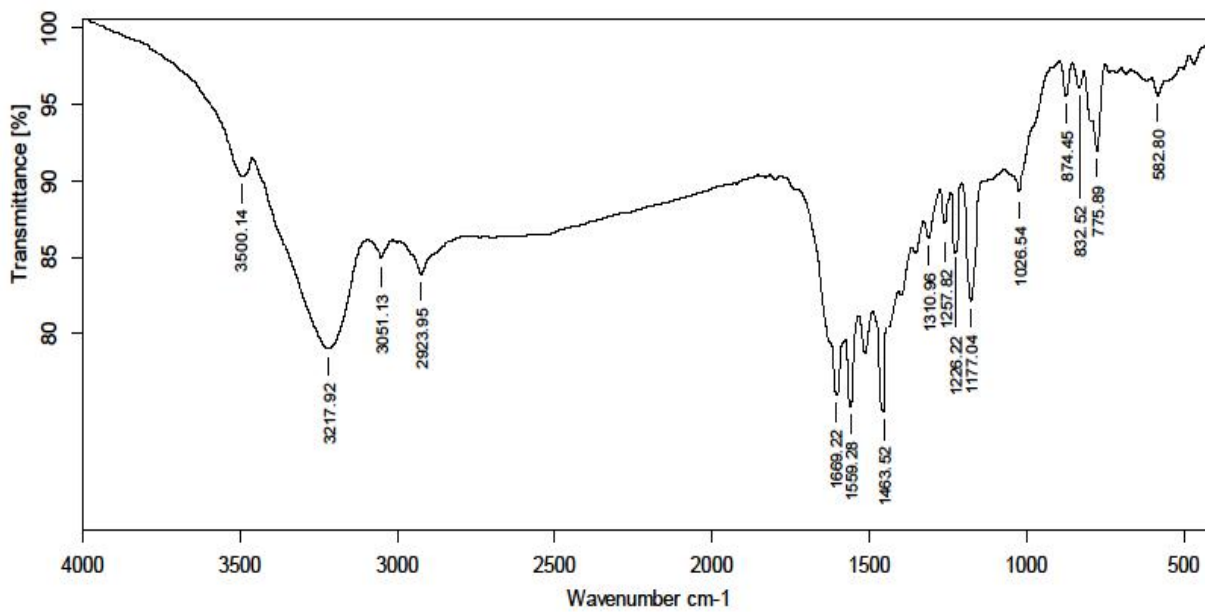

Figure S11: IR Spectroscopy of Compound 10a

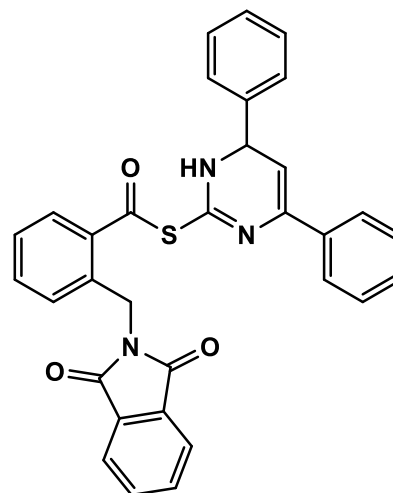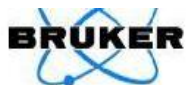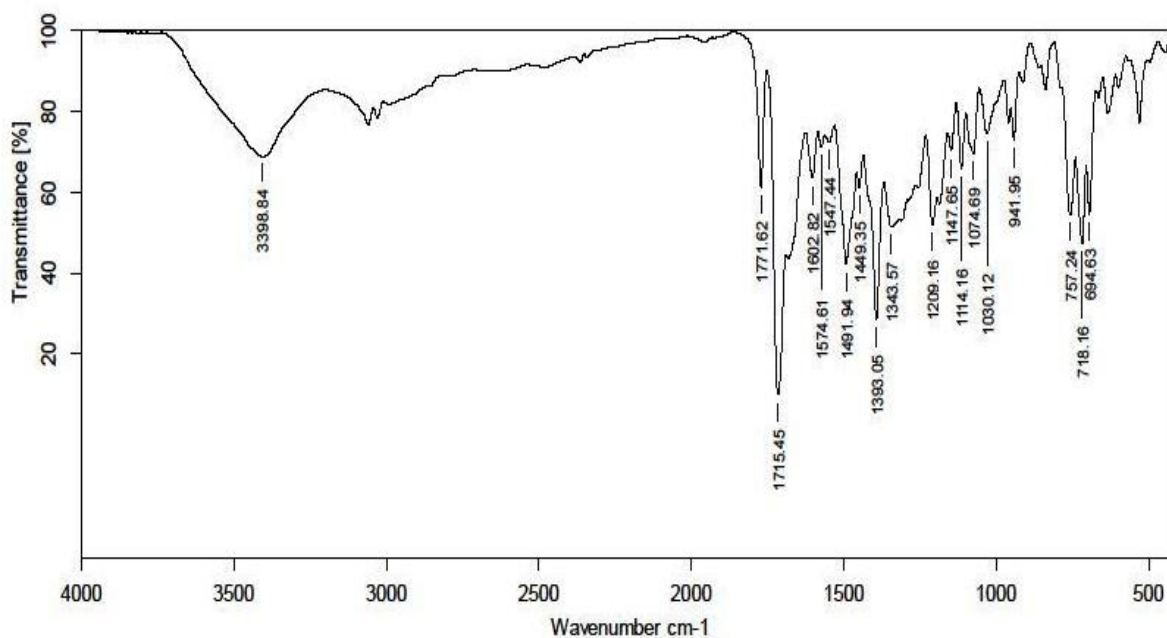

**Figure S12: IR Spectroscopy of Compound 10b**

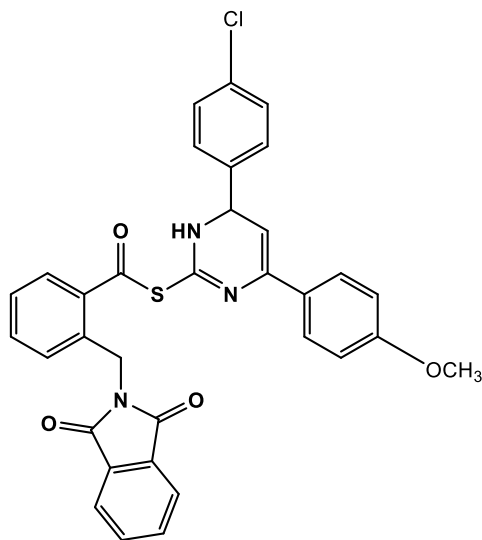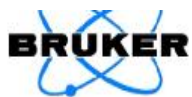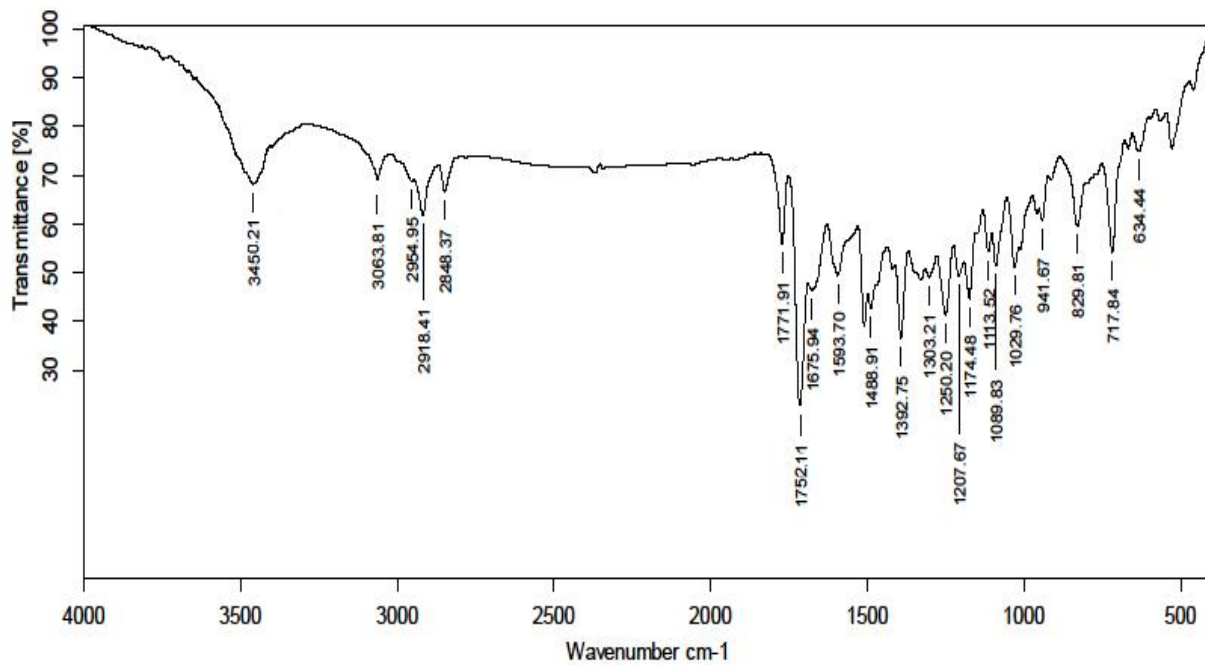

Figure S13: IR Spectroscopy of Compound 10c

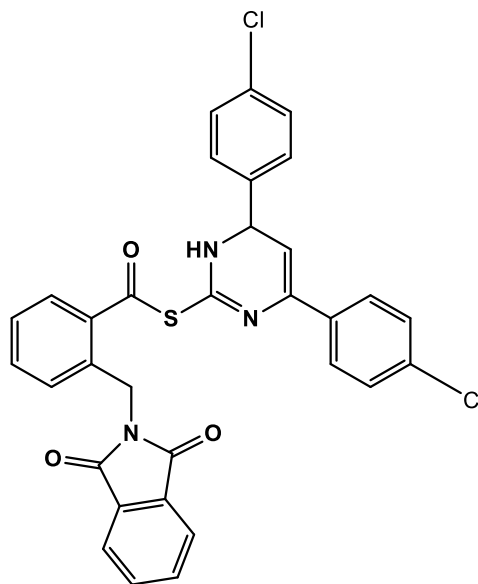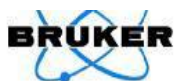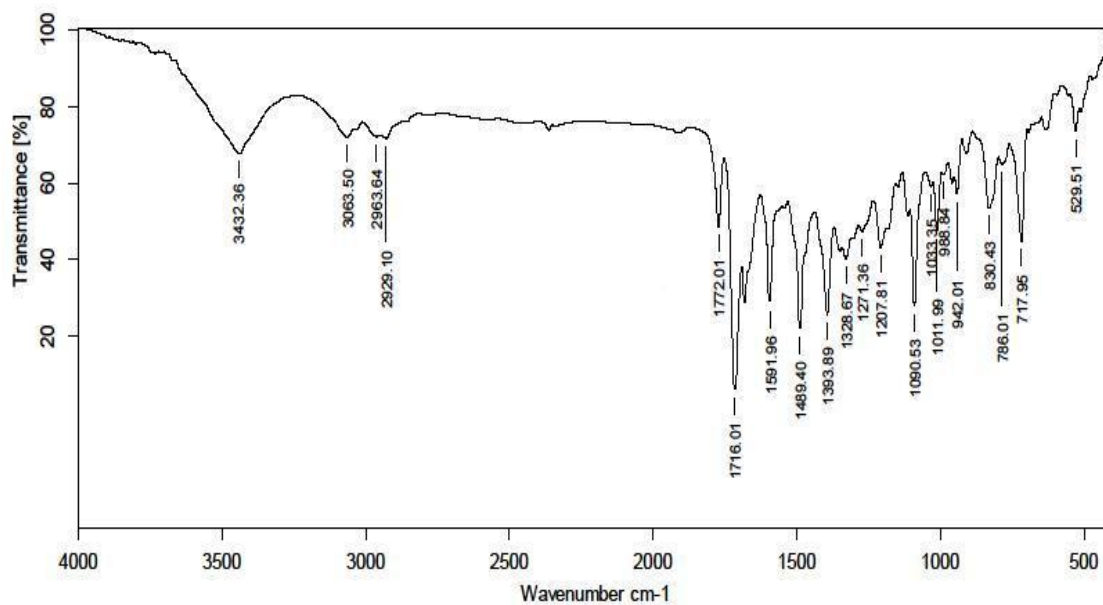

Figure S14: IR Spectroscopy of Compound 10d

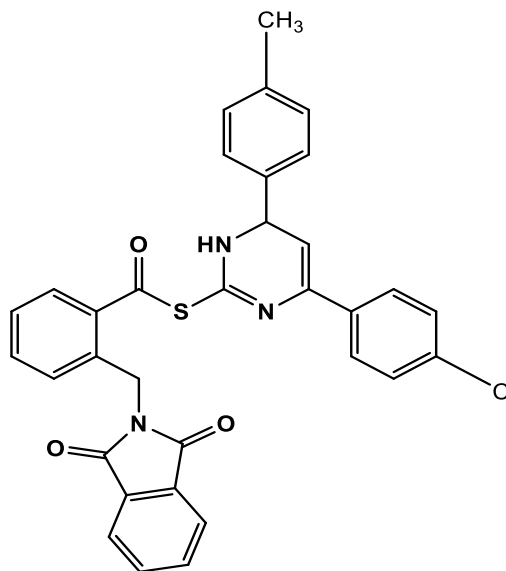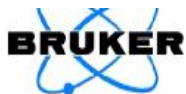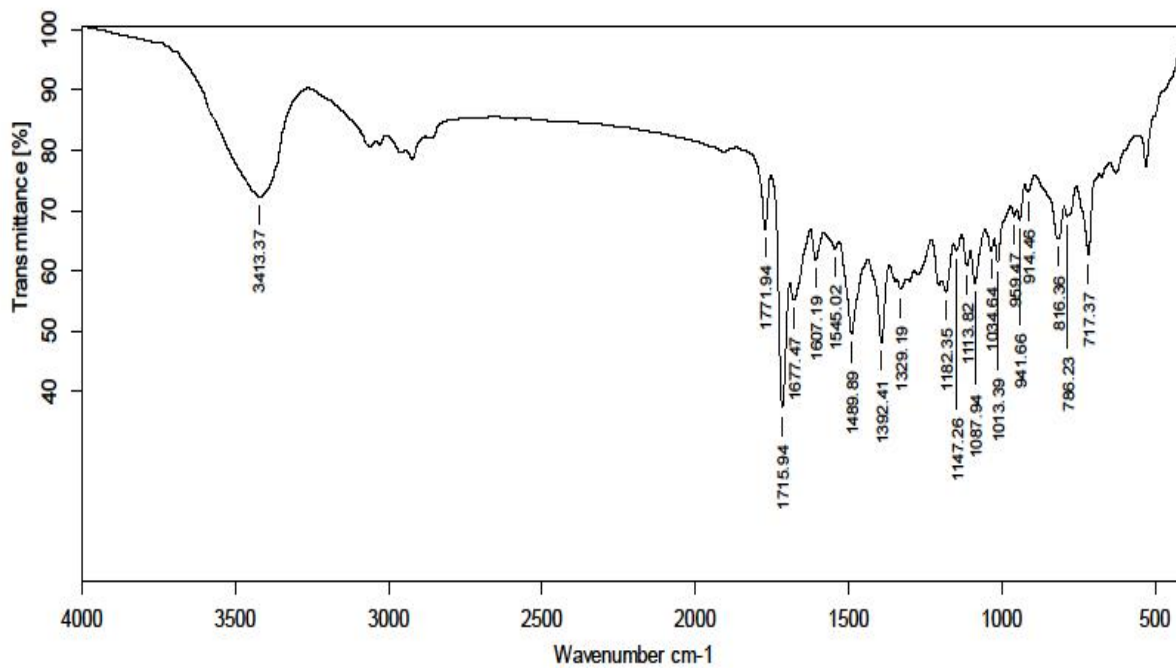

Figure S15: IR Spectroscopy of Compound 10e

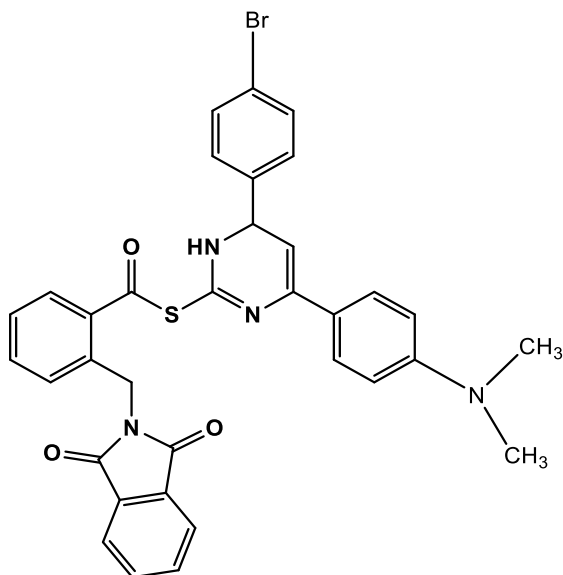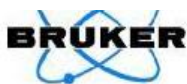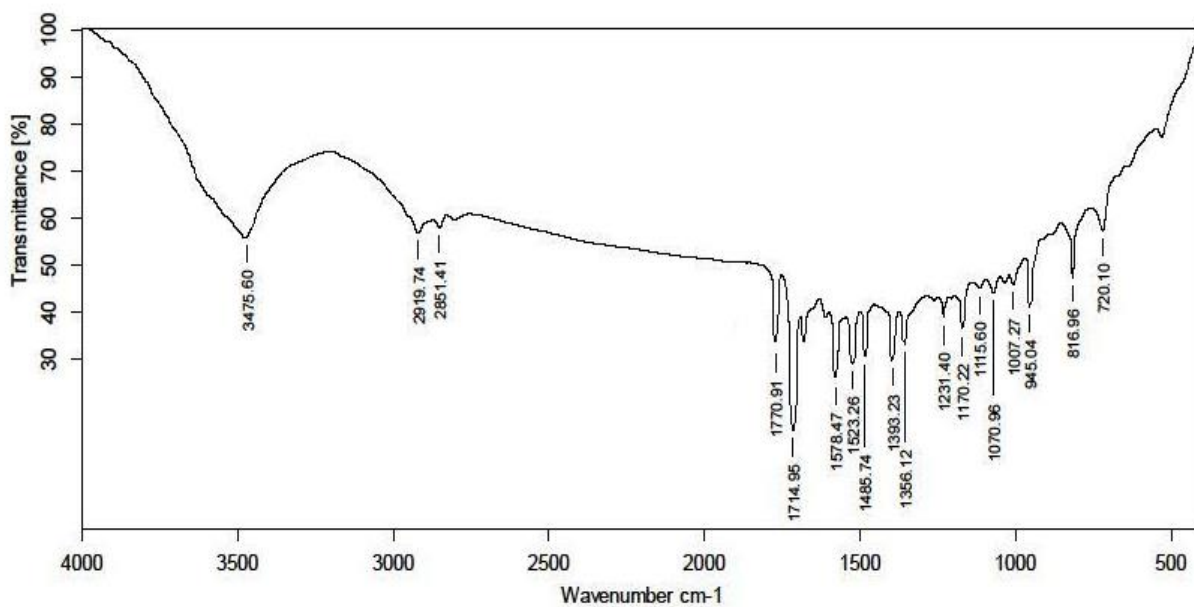

Figure S16: IR Spectroscopy of Compound 10f

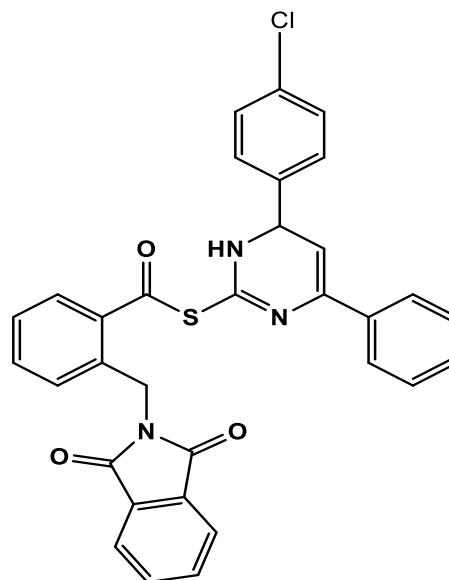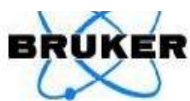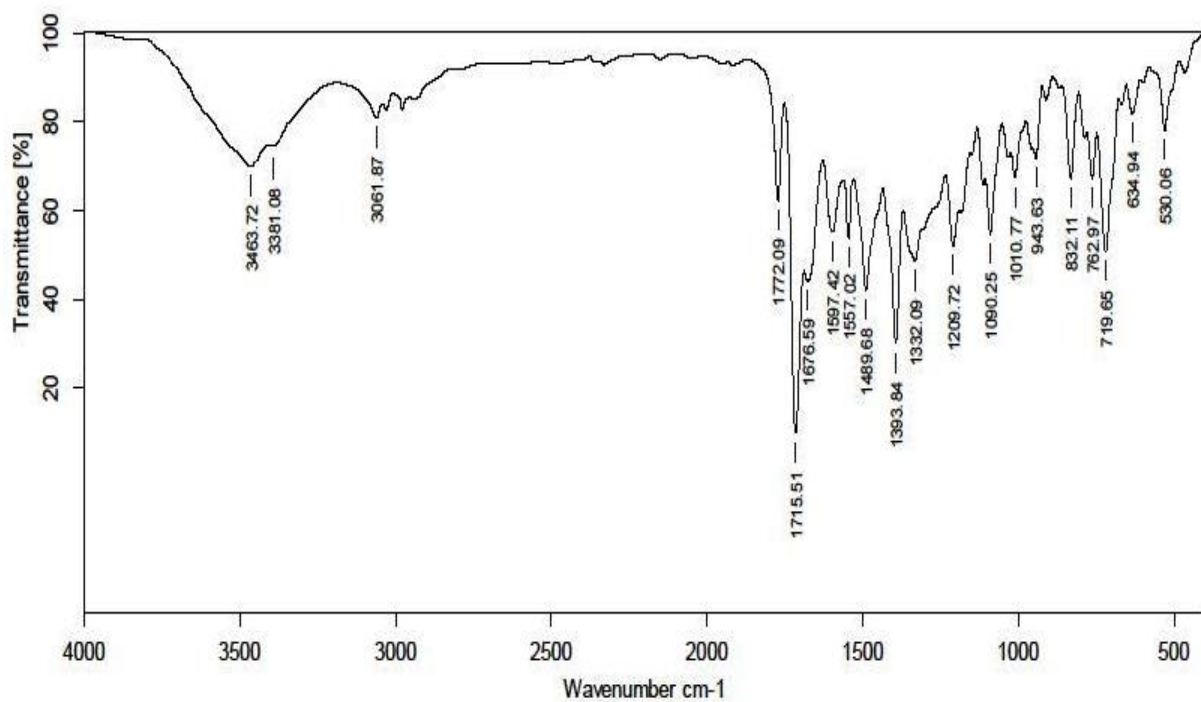



Figure S17: IR Spectroscopy of Compound 10g

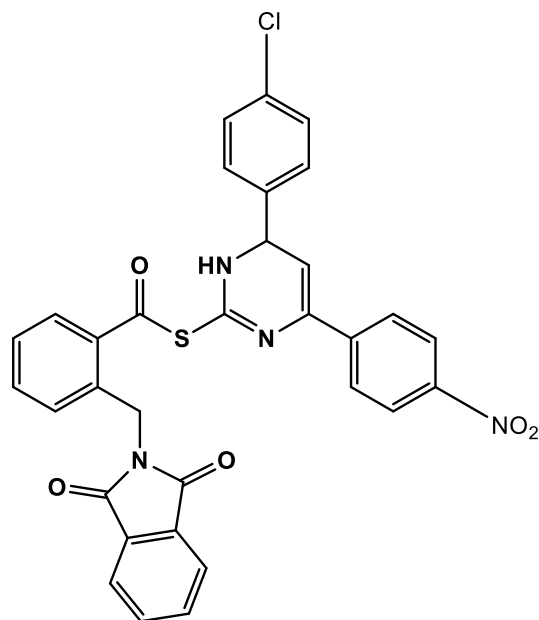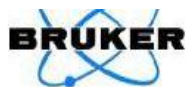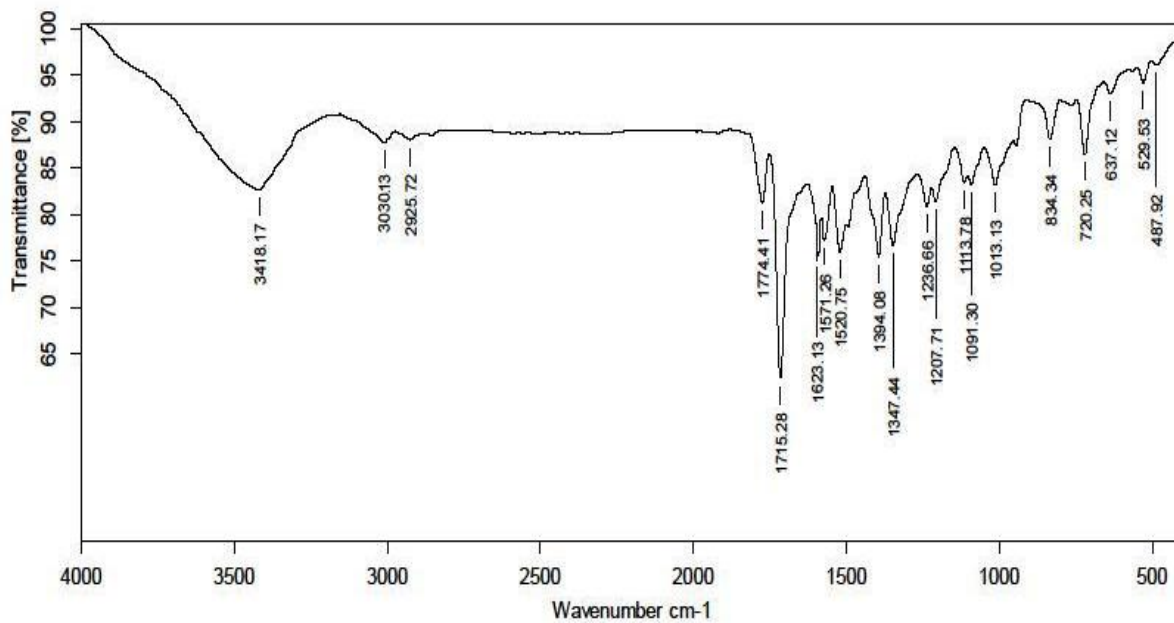

Figure S18: IR Spectroscopy of Compound 10h

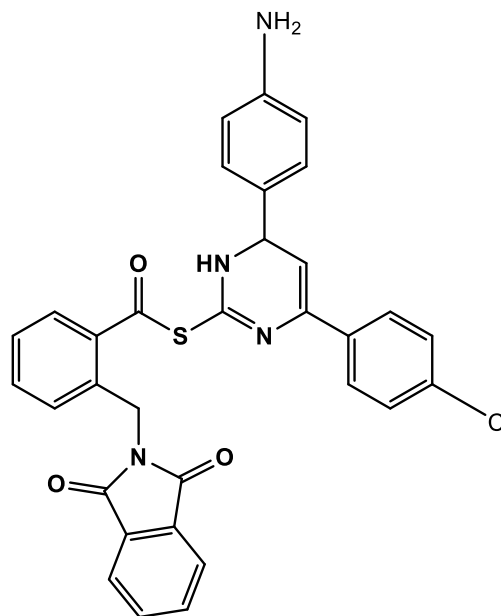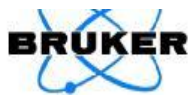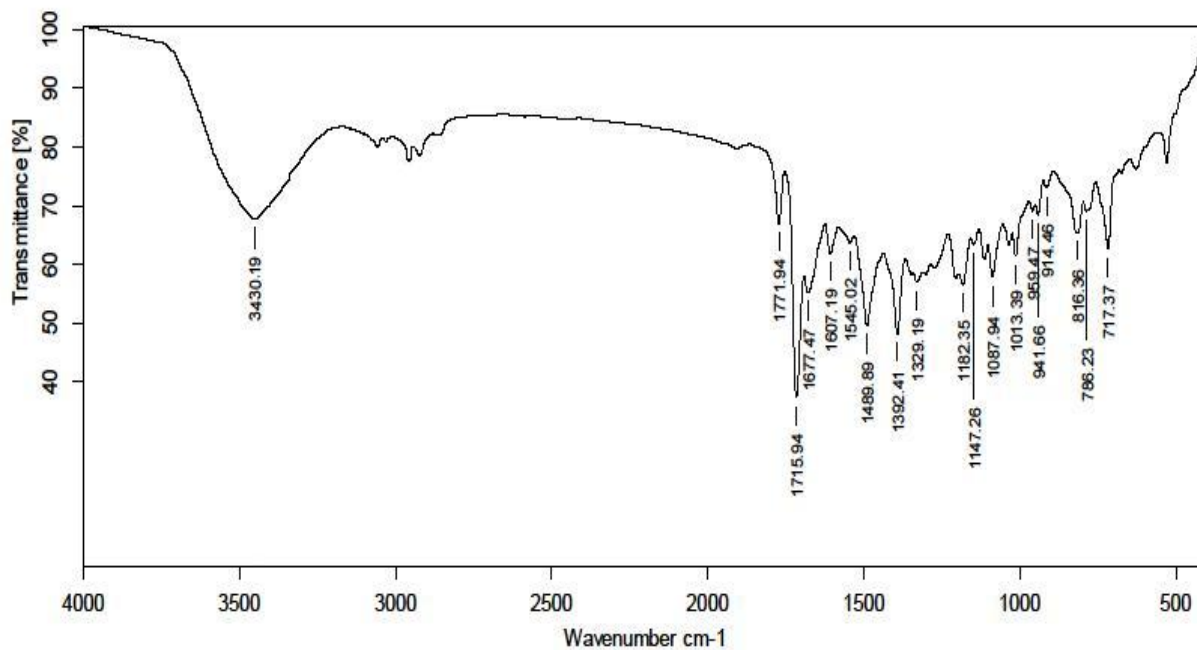

**Figure S19:** IR Spectroscopy of Compound **10i**

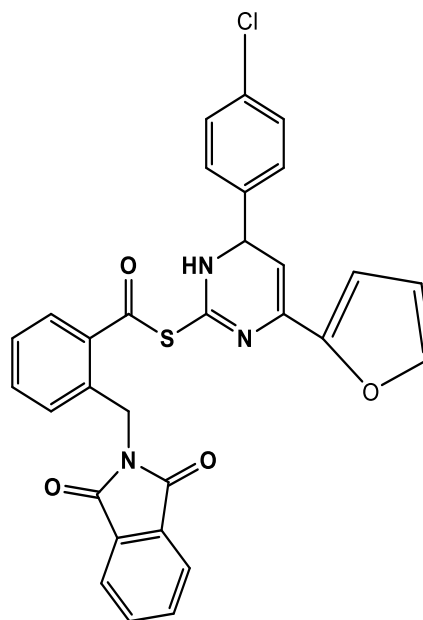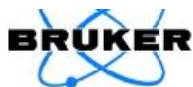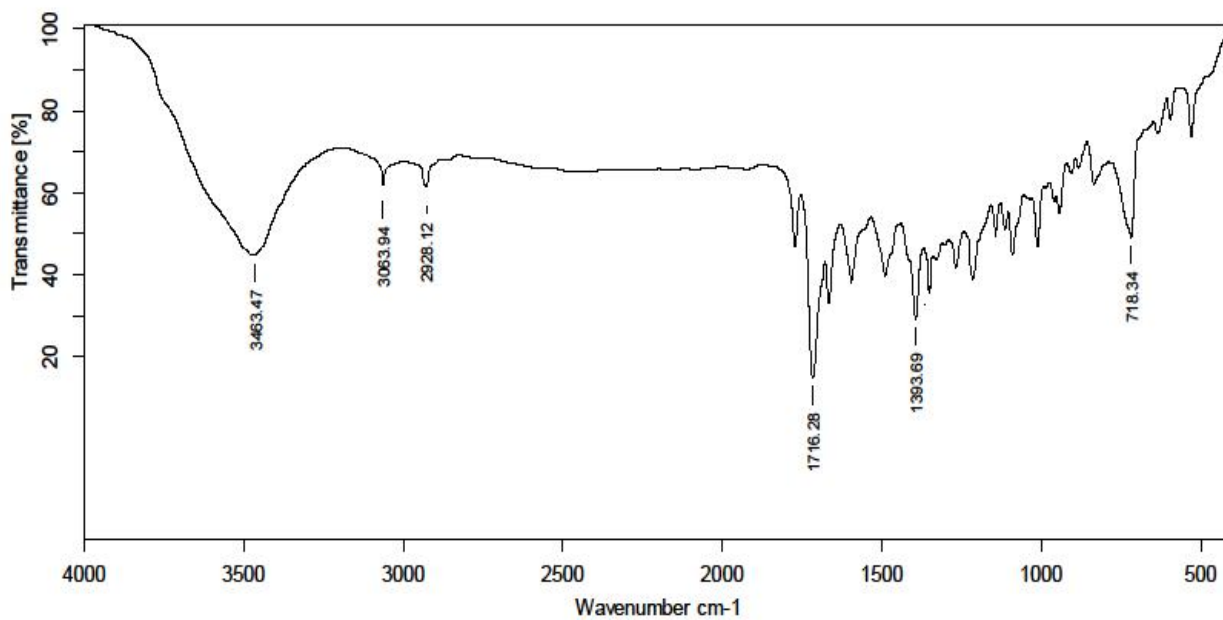

Figure S20: IR Spectroscopy of Compound 10j

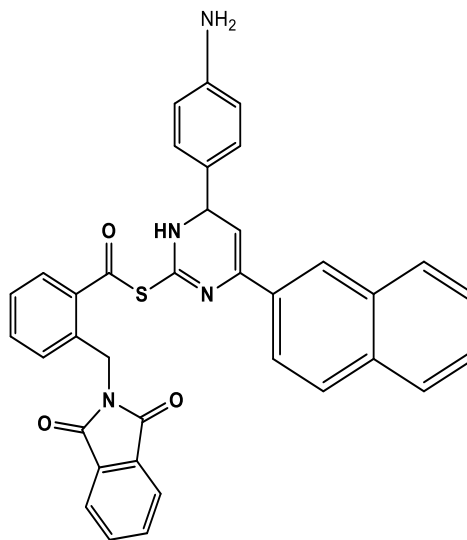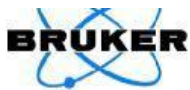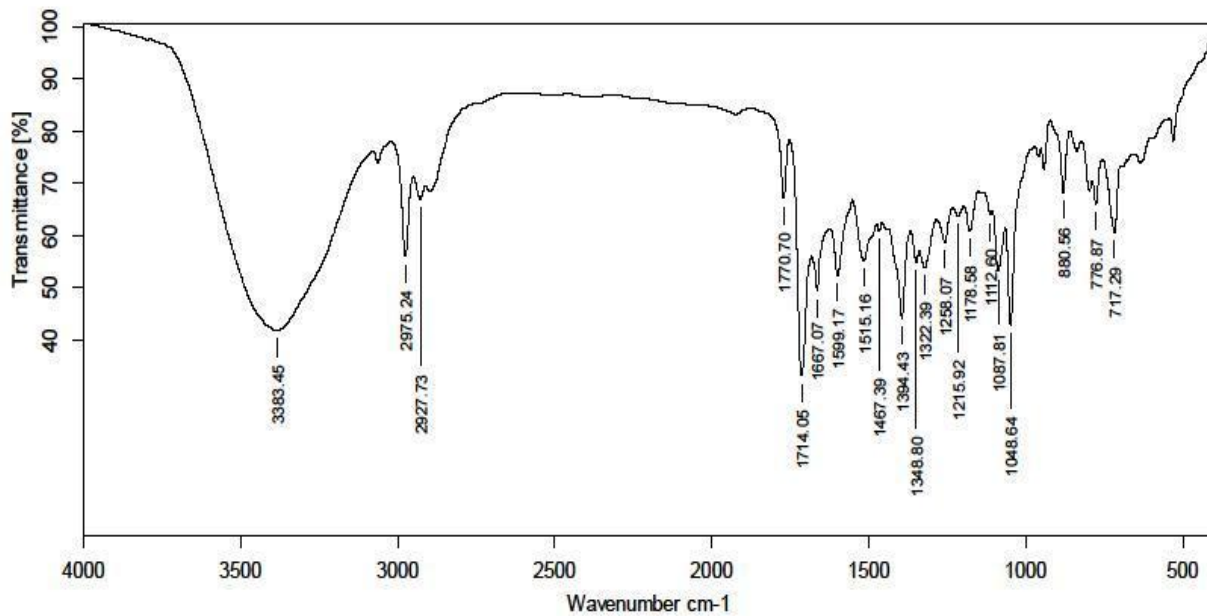

# <sup>1</sup>H NMR Spectroscopy

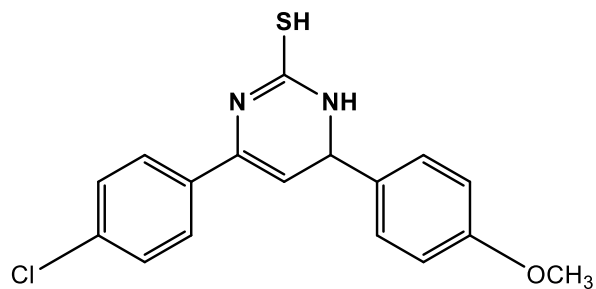

Figure S21: <sup>1</sup>H NMR Spectroscopy of Compound 5b

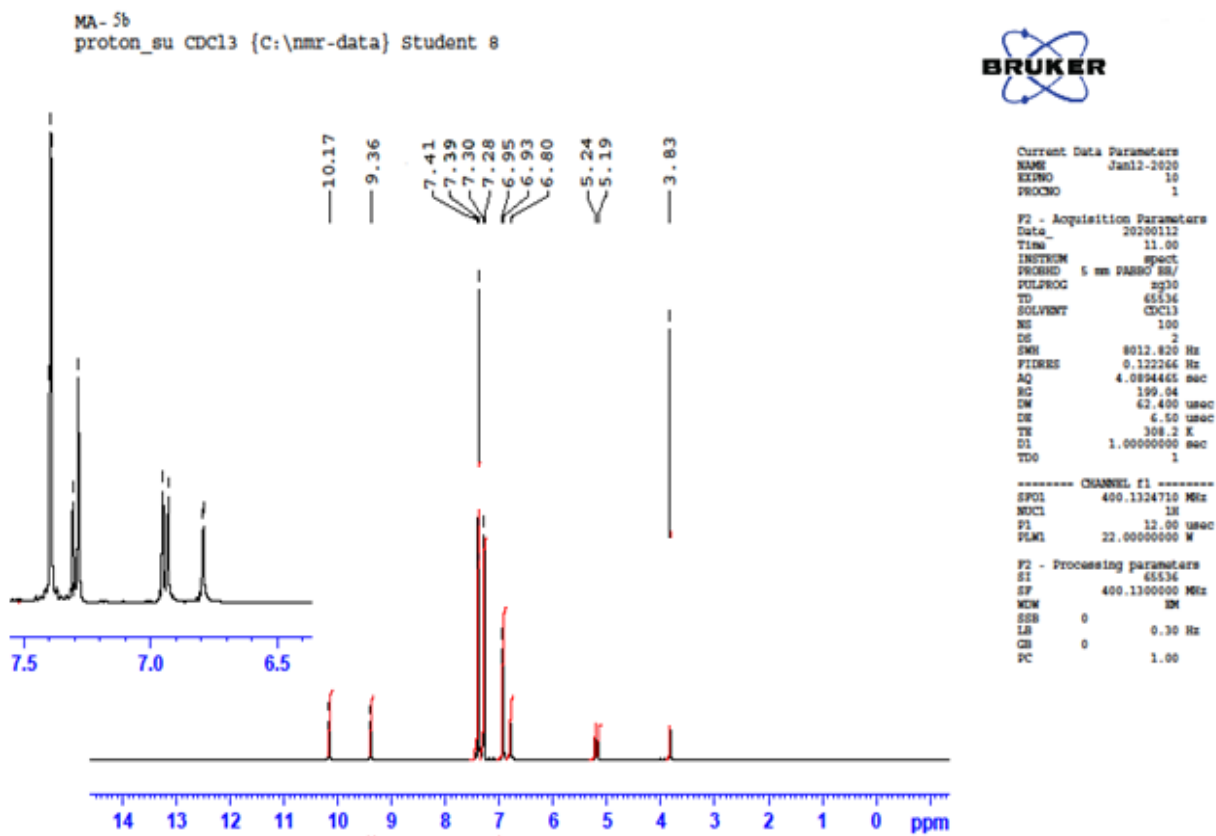

Figure S22: <sup>1</sup>H NMR Spectroscopy of Compound 5c

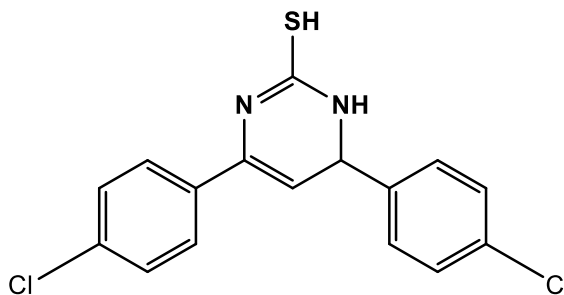

MA-5c  
proton\_su CDCl3 [c:\nmr-data] Student 12

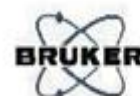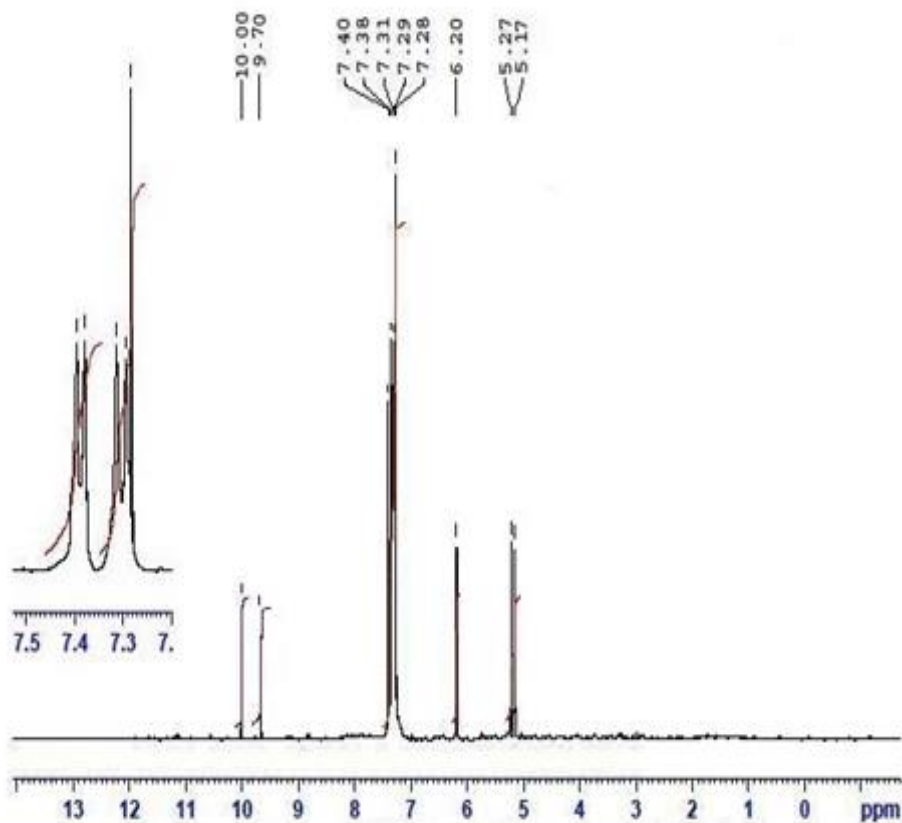

Current Data Parameters  
NAME Jan12-2020  
EXPNO 50  
PROCNO 1

F2 - Acquisition Parameters  
Date\_ 20200112  
Time 11.47  
INSTRUM spect  
PROBHD 5 mm JASCO BR/  
PULPROG zg30  
TD 65536  
SOLVENT CDCl3  
NS 190  
DS 2  
SWH 8012.820 Hz  
FIDRES 0.122266 Hz  
AQ 4.0894465 sec  
RG 199.04  
RM 62.400 usec  
DE 6.50 usec  
TE 308.1 K  
D1 1.00000000 sec  
TD0 1

----- CHANNEL f1 -----  
SFO1 400.1324710 MHz  
NUC1 1H  
P1 12.00 usec  
PLM1 22.00000000 W

F2 - Processing parameters  
SI 65536  
SF 400.1300000 MHz  
WDW EM  
SSB 0  
LB 0.30 Hz  
GB 0  
PC 1.00

**Figure S23:**  $^1\text{H}$  NMR Spectroscopy of Compound **5d**

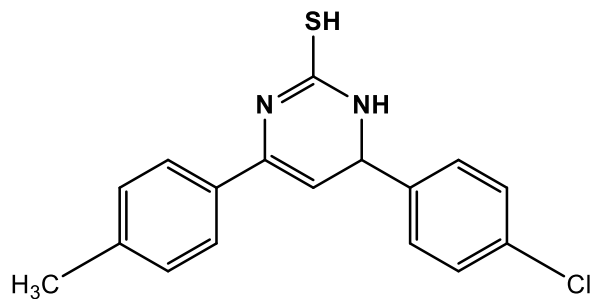

MA-54  
proton\_su CDCl3 [C:\nmr-data] Student 10

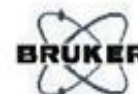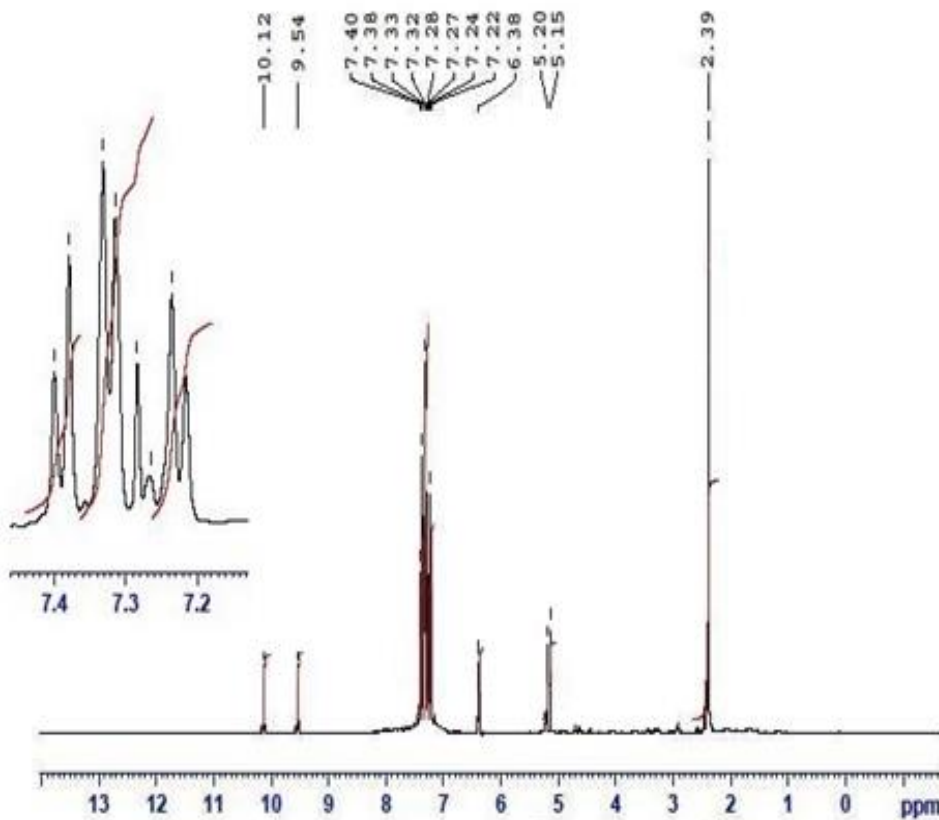

Current Data Parameters  
NAME Jan12-2020  
EXPNO 30  
PROCNO 1

F2 - Acquisition Parameters  
Date\_ 20200112  
Time 11.23  
INSTRUM spect  
PROBHD 5 mm PABBO NH/  
PULPROG zg30  
TD 65536  
SOLVENT CDCl3  
NS 100  
DS 2  
SWH 8012.820 Hz  
FIDRES 0.122264 Hz  
AQ 4.9894465 sec  
RG 199.04  
DW 62.400 usec  
DE 6.50 usec  
TE 308.2 K  
D1 1.00000000 sec  
TD0 1

----- CHANNEL f1 -----  
SFO1 400.1324710 MHz  
NUC1 1H  
P1 12.00 usec  
PLW1 22.00000000 W

F2 - Processing parameters  
SI 65536  
SF 400.1300000 MHz  
WDW EM  
SSB 0  
LB 0.30 Hz  
GB 0  
PC 1.00

Figure S24: <sup>1</sup>H NMR Spectroscopy of Compound 5e

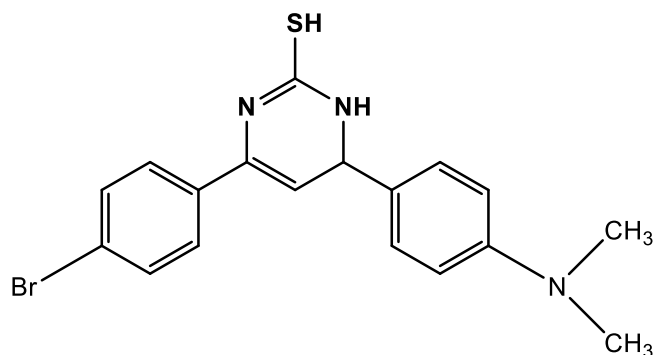

MA-5e  
proton\_bu CDCl3 [C:\nmr-data] Student 14

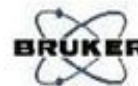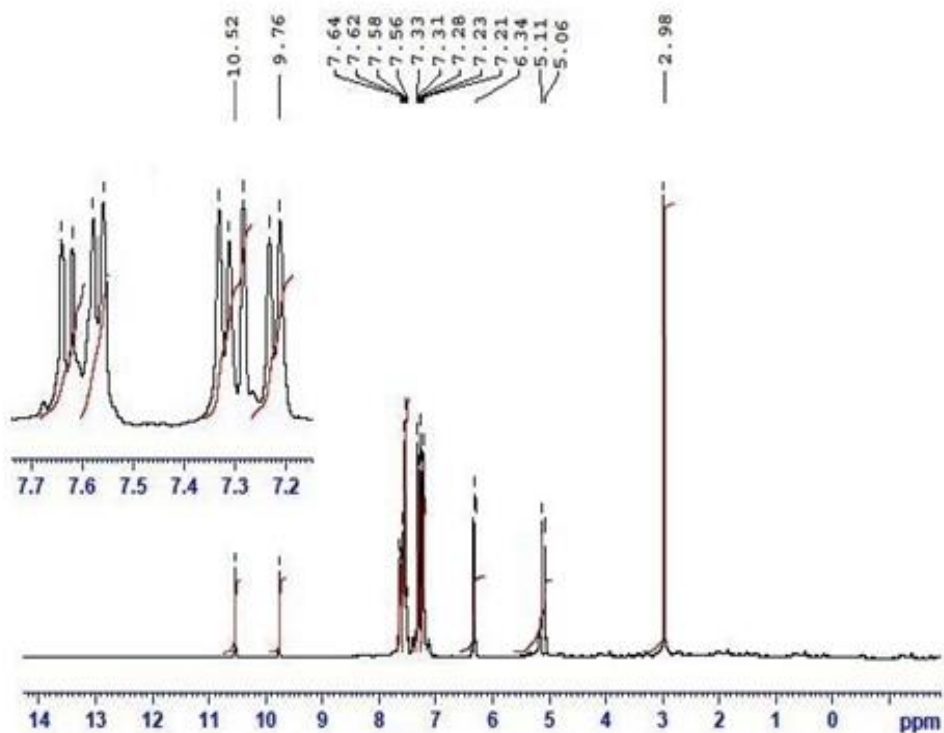

Current Data Parameters  
NAME Jan17-2020  
EXNO 70  
PROCNO 1

F2 - Acquisition Parameters  
Date\_ 20100112  
Time 12.13  
INSTRUM spect  
PROBHD 5 mm PABBO BB  
PULPROG zgpg30  
TD 65536  
SOLVENT CDCl3  
NS 100  
DS 2  
SWH 8012.800 Hz  
FIDRES 0.122266 Hz  
AQ 4.0894465 sec  
RG 199.04  
CW 62.400 usec  
DE 6.50 usec  
TE 308.2 K  
D1 1.00000000 sec  
TDC 1

----- CHANNEL f1 -----  
SPOL 400.1324710 MHz  
NUC1 1H  
P1 12.00 usec  
PLM1 22.00000000 M

F2 - Processing parameters  
SI 65536  
SF 400.1300000 MHz  
WDW EM  
SSB 0  
LB 0.30 Hz  
GB 0  
PC 1.00



Figure S25: <sup>1</sup>H NMR Spectroscopy of Compound 5f

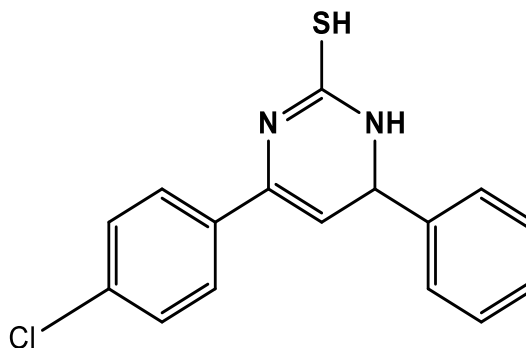

MA-5f  
proton\_su CDCl3 (C:\nmr-data) Student 13

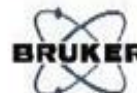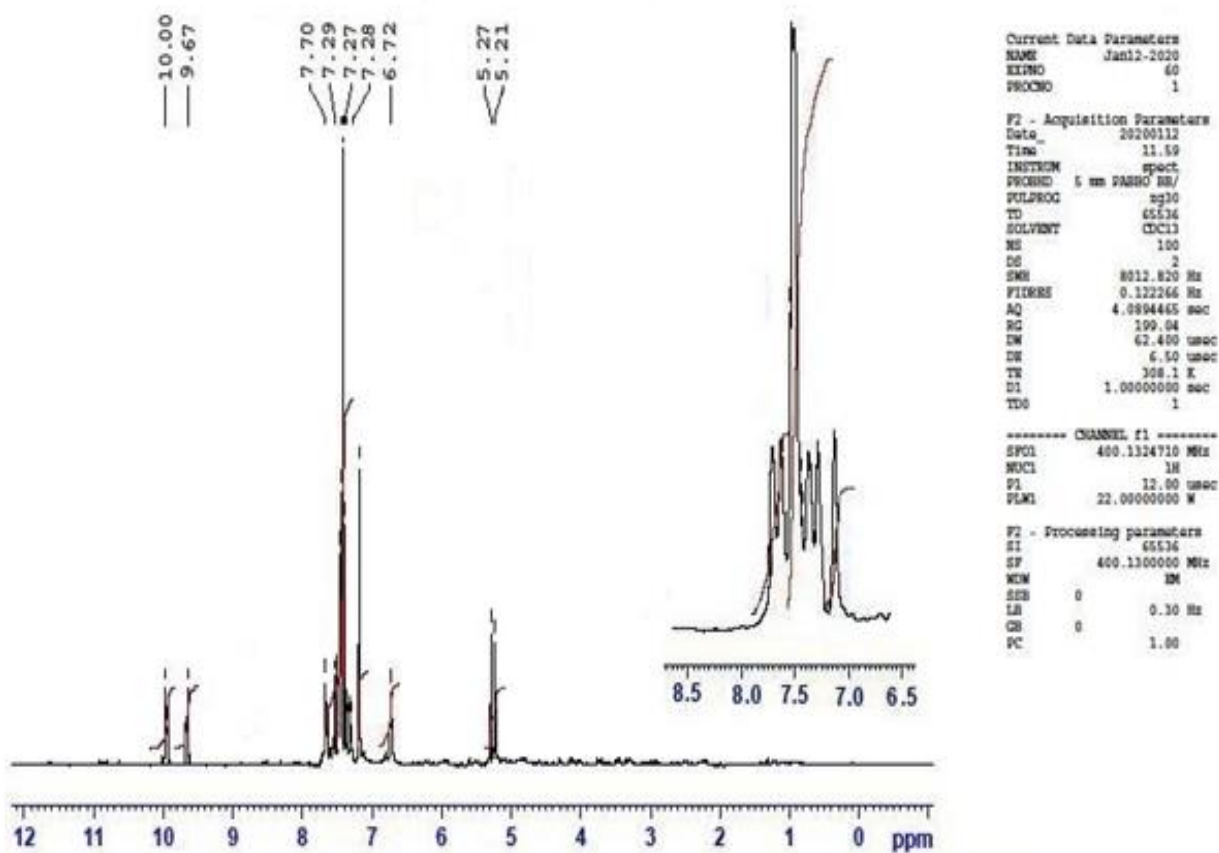

Figure S26: <sup>1</sup>H NMR Spectroscopy of Compound 5g

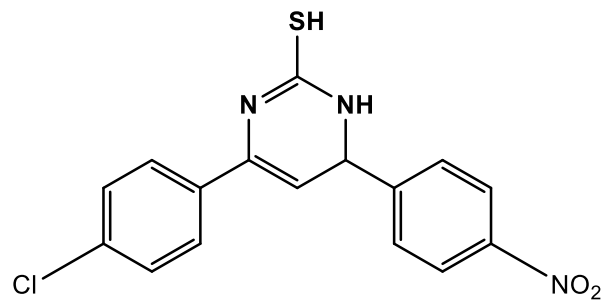

MA-5g  
proton\_su CDCl3 {C:\nmr-data} Student 17

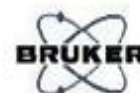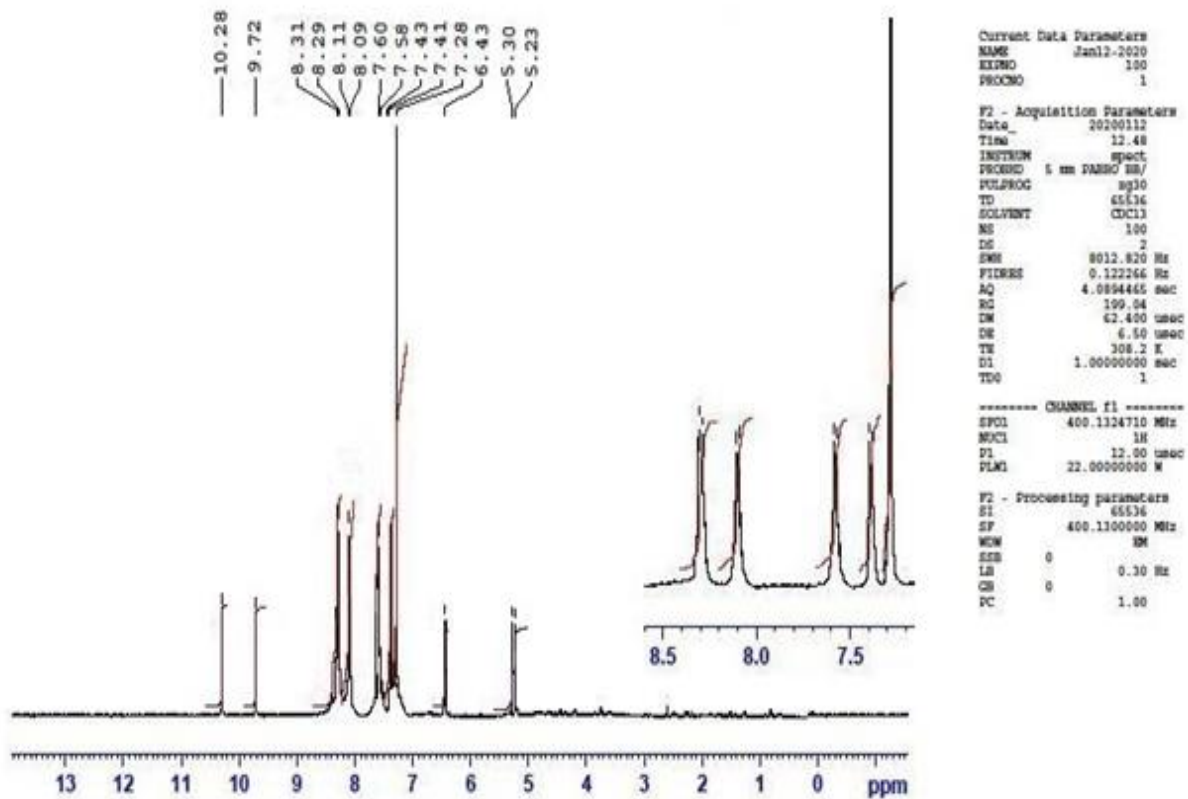

Figure S27: <sup>1</sup>H NMR Spectroscopy of Compound 5h

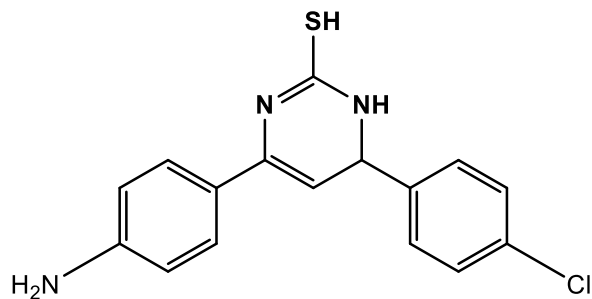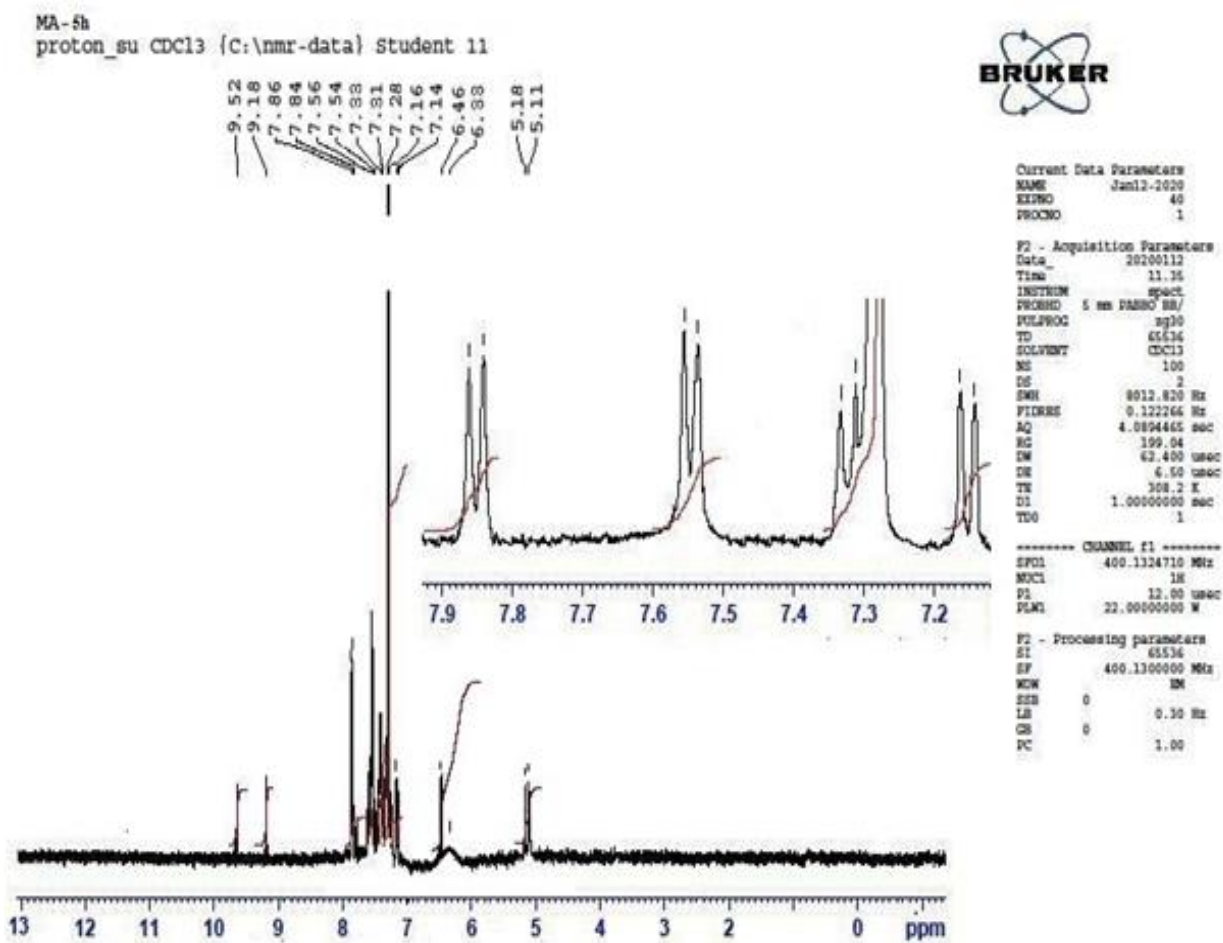

Figure S28: <sup>1</sup>H NMR Spectroscopy of Compound 5i

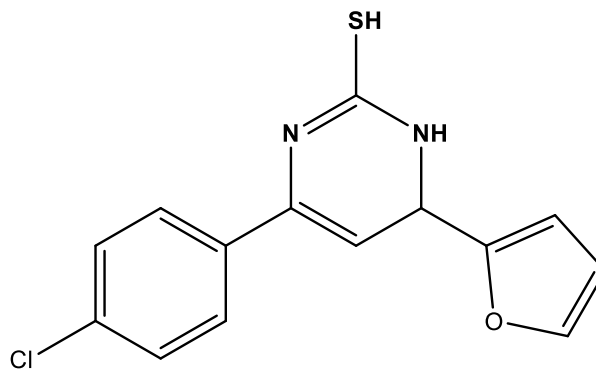

MA-5i  
proton\_su CDCl3 {C:\nmr-data} Student 16

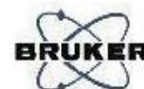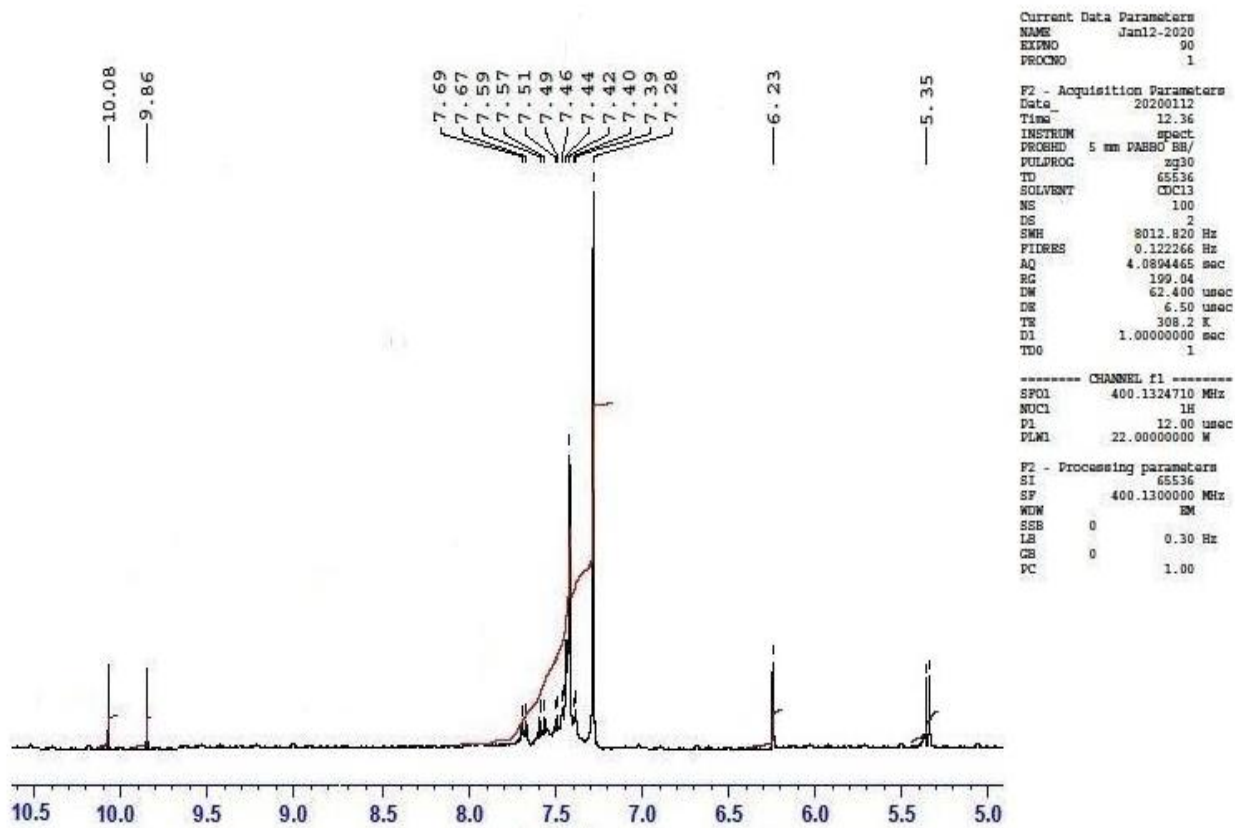

**Figure S29:**  $^1\text{H}$  NMR Spectroscopy of Compound **5j**

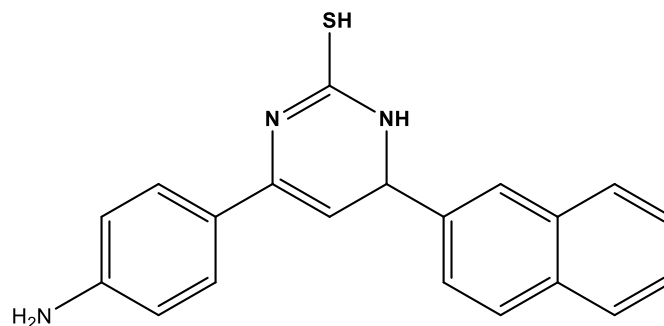

MA- 5j  
proton\_su CDCl3 [C:\nmr-data] Student 9

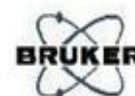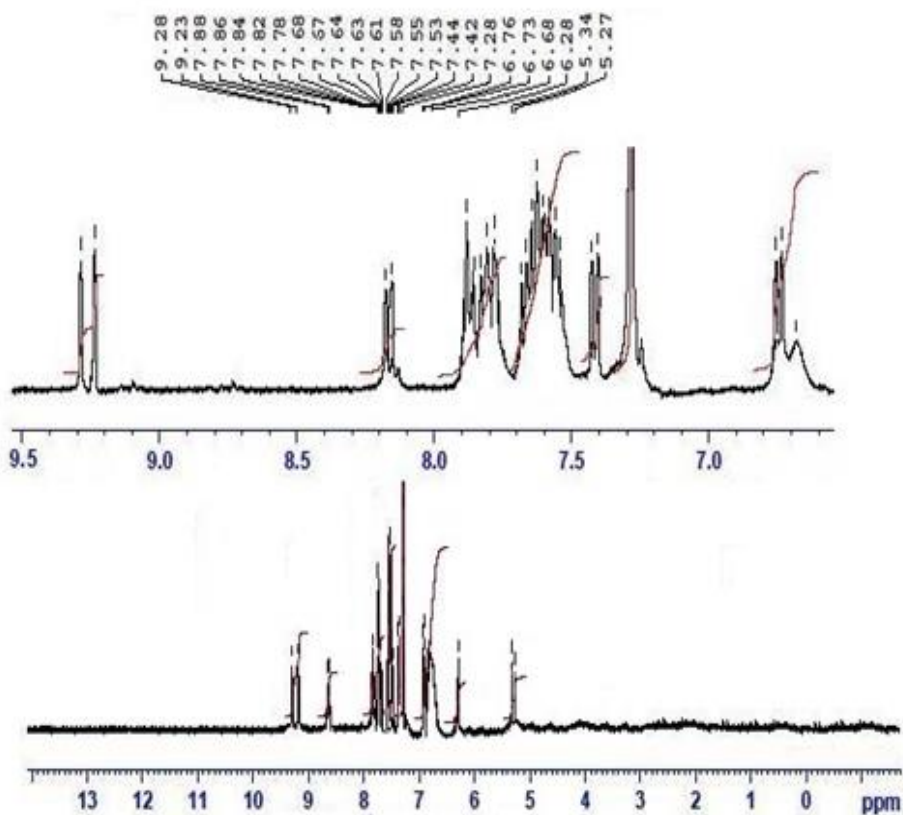

Current Data Parameters  
NAME Jan12-2020  
EXTRNO 20  
PROCNO 1

F2 - Acquisition Parameters  
Date\_ 20200112  
Time 11.11  
INSTRUM spect  
PROBHD 5 mm JNMBO SH/  
PULPROG zg30  
TD 65536  
SOLVENT CDCl3  
NS 100  
DS 2  
SWH 8012.820 Hz  
FIDRES 0.122266 Hz  
AQ 4.0894465 sec  
RG 199.04  
SM 62.400 usec  
SE 6.50 usec  
TE 308.2 K  
SI 1.00000000 sec  
TD0 1

----- CHANNEL f1 -----  
SP01 400.1324710 MHz  
NUC1 1H  
P1 12.00 usec  
PLM1 22.00000000 W

F2 - Processing parameters  
SI 65536  
SF 400.1300000 MHz  
MEM 8M  
SSB 0  
LB 0.30 Hz  
GB 0  
PC 1.00

Figure S30: <sup>1</sup>H NMR Spectroscopy of Compound 10a

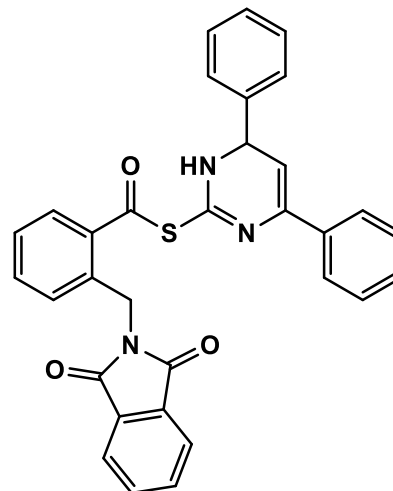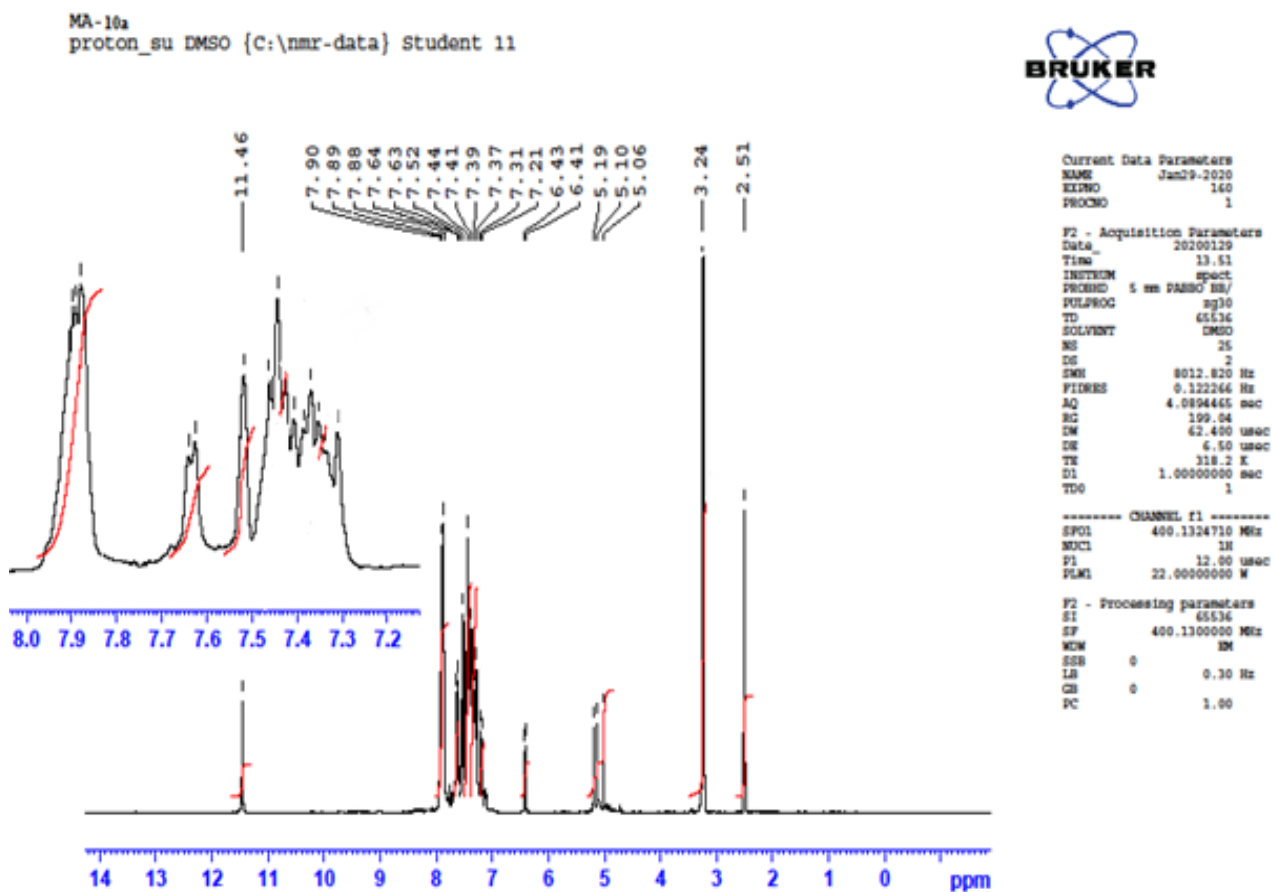

**Figure S31:**  $^1\text{H}$  NMR Spectroscopy of Compound **10b**



MA- 10b  
proton\_su DMSO (C:\nmr-data) Student 12

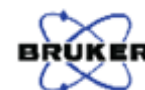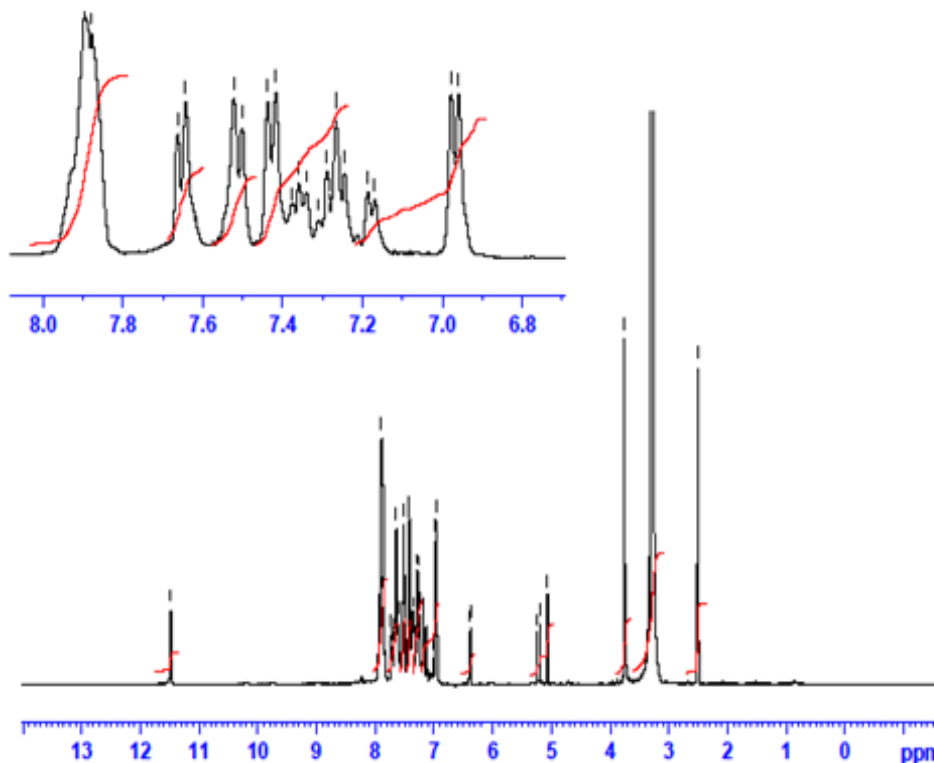

```

Current Data Parameters
NAME          Jan29-2020
EXPNO        170
PROCNO        1

F2 - Acquisition Parameters
Data_         20200129
Time_         13.56
INSTRUM       spect
PROBHD        5 mm PABBO BB/
PULPROG       zg30
TD            65536
SOLVENT       DMSO
NS            25
DS            2
SWH           8012.820 Hz
FIDRES       0.122264 Hz
AQ           4.0894465 sec
RG           120.97
DM           62.400 usec
DE           6.50 usec
TE           318.1 K
D1           1.0000000 sec
TDO          1

----- CHANNEL f1 -----
SFO1         400.1324710 MHz
NUC1          1H
P1           12.00 usec
PL1          22.0000000 W

F2 - Processing parameters
SI           65536
SF           400.1300000 MHz
WDW          RM
SSB          0
LB           0.30 Hz
GB           0
PC           1.00
    
```

**Figure S32:**  $^1\text{H}$  NMR Spectroscopy of Compound **10c**

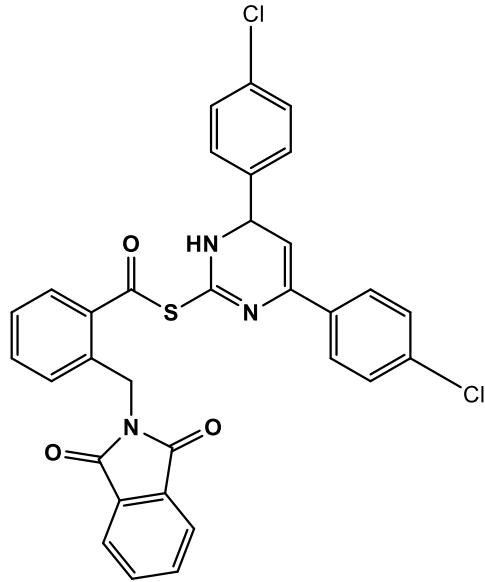

MA- 1k  
proton\_su DMSO (C:\nmr-data) Student 13

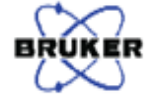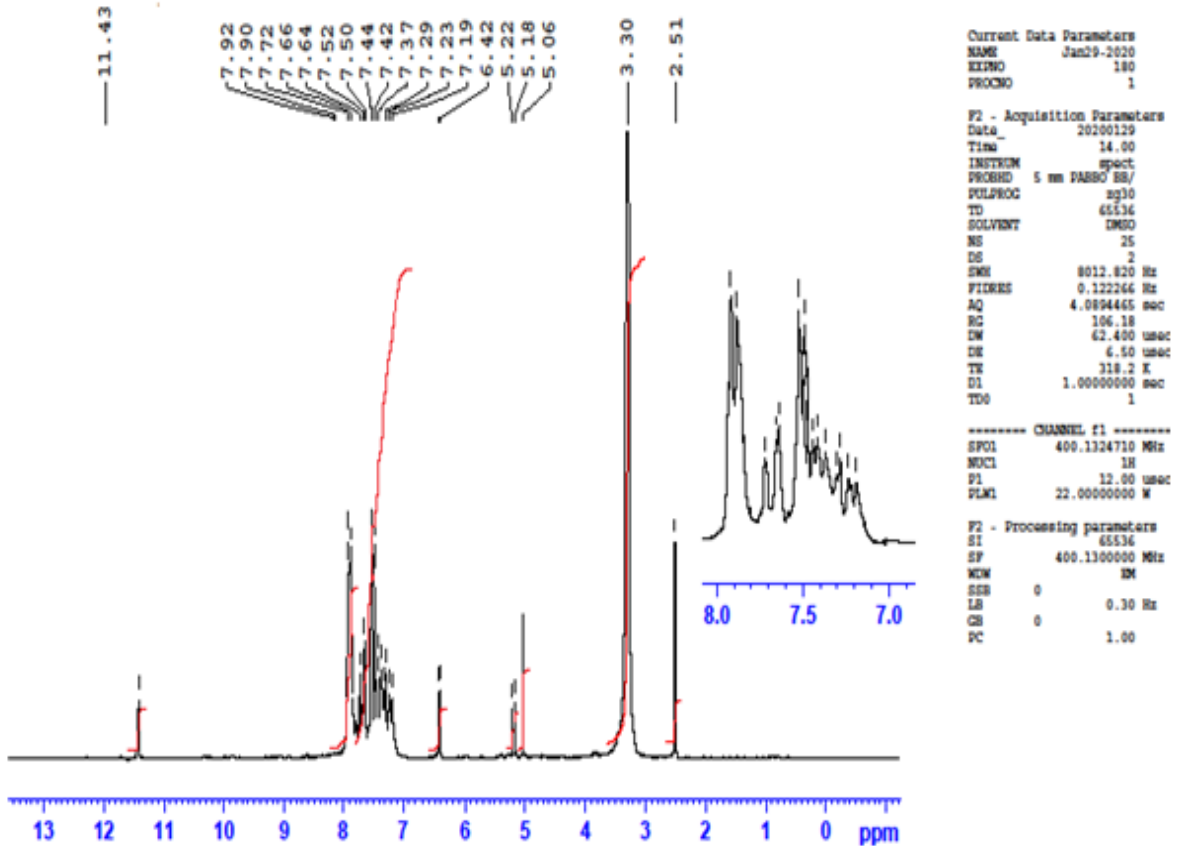



Figure S33: <sup>1</sup>H NMR Spectroscopy of Compound 10d

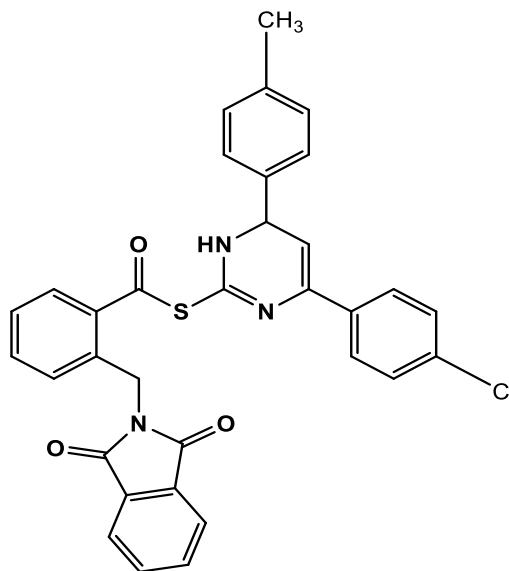

MA- 10d  
proton\_su DMSO {C:\nmr-data} Student 15

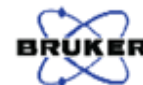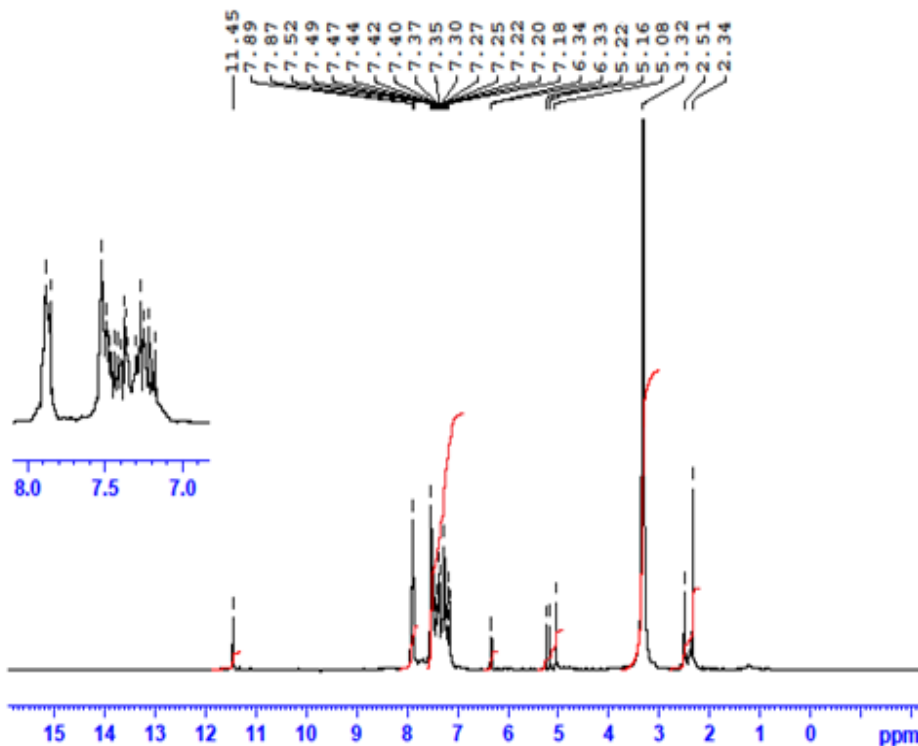

Current Data Parameters  
NAME Jan29-2020  
EXPRM 200  
PROCNO 1

F2 - Acquisition Parameters  
Date\_ 20200129  
Time\_ 14.10  
INSTRM spect  
PROBHD 5 mm PARBO BB/  
PULPROG zg30  
TD 65536  
SOLVENT DMSO  
NS 25  
DS 2  
SWH 8012.820 Hz  
FIDRES 0.122266 Hz  
AQ 4.0894465 sec  
RG 68.22  
EW 62.400 usec  
DE 6.50 usec  
TE 318.1 K  
D1 1.0000000 sec  
TDO 1

----- CHANNEL f1 -----  
SFO1 400.1324710 MHz  
NUC1 1H  
P1 12.00 usec  
PLM1 22.00000000 W

F2 - Processing parameters  
SI 65536  
SF 400.1300000 MHz  
WDW EM  
SSB 0  
LB 0.30 Hz  
GB 0  
PC 1.00

Figure S34: <sup>1</sup>H NMR Spectroscopy of Compound 10e



MA-10e  
proton\_su DMSO (C:\nmr-data) Student 16

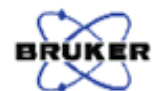

```
Current Data Parameters
NAME      Jan19-2020
EXPNO     210
PROCNO    1

F2 - Acquisition Parameters
Date_     20200129
Time      14.15
INSTRUM   spect
PROBHD    5 mm DMSO-81/
PULPROG   zg30
TD         65536
SOLVENT   DMSO
NS         25
DS         2
SFO1      8012.820 Hz
FIDRES    0.122266 Hz
AQ         4.0894465 sec
RG         199.04
SWH        62.400 usec
DE         6.50 usec
TK         318.2 K
D1         1.00000000 sec
TD0        1

----- CHANNEL f1 -----
SFO1      400.1324710 MHz
NUC1       1H
P1         12.00 usec
PLA1       22.00000000 W

F2 - Processing parameters
SI         65536
SF         400.1300000 MHz
WDW        EM
SSB        0
LB         0.30 Hz
GB         0
PC         1.00
```

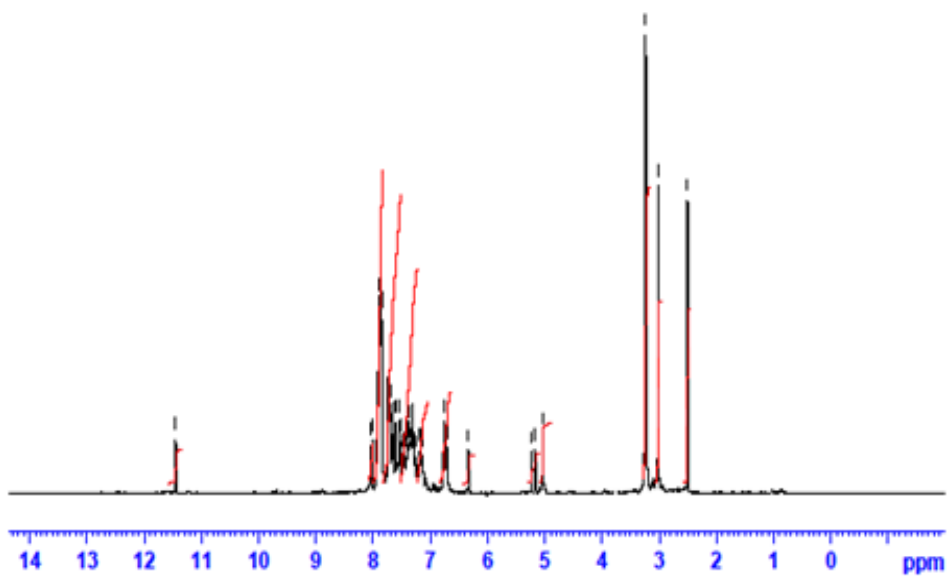

Figure S35: <sup>1</sup>H NMR Spectroscopy of Compound 10f

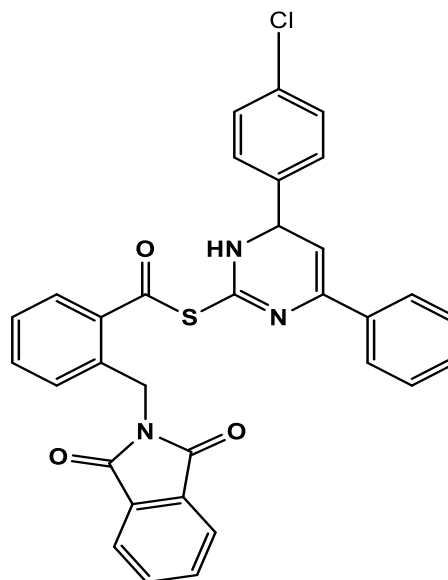

MA-10f  
proton\_su DMSO (C:\nmr-data) Student 17

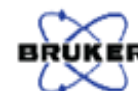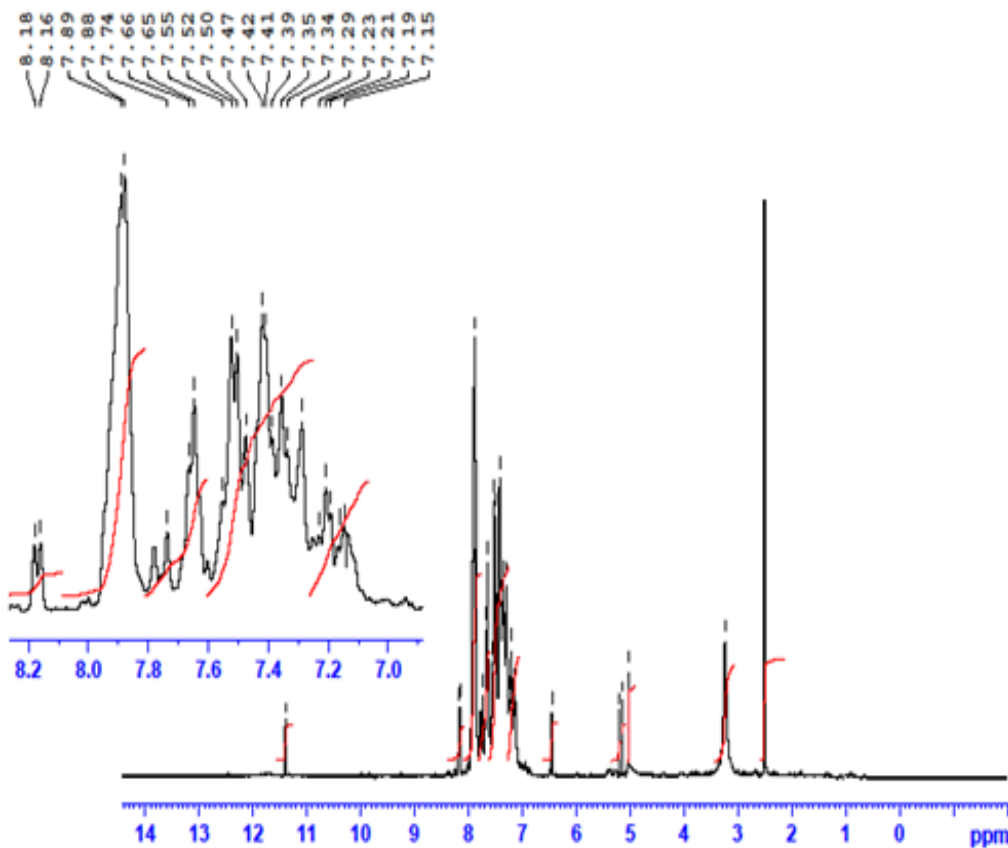

**Figure S36:**  $^1\text{H}$  NMR Spectroscopy of Compound **10g**

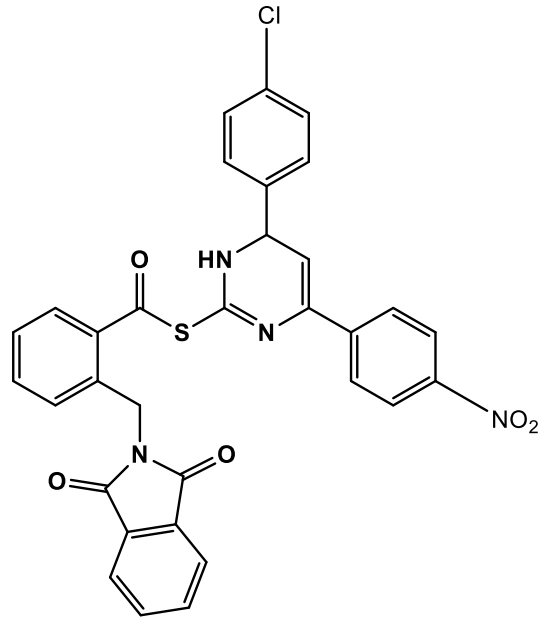

MA-10g  
proton\_su DMSO (C:\nmr-data) Student 18

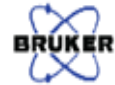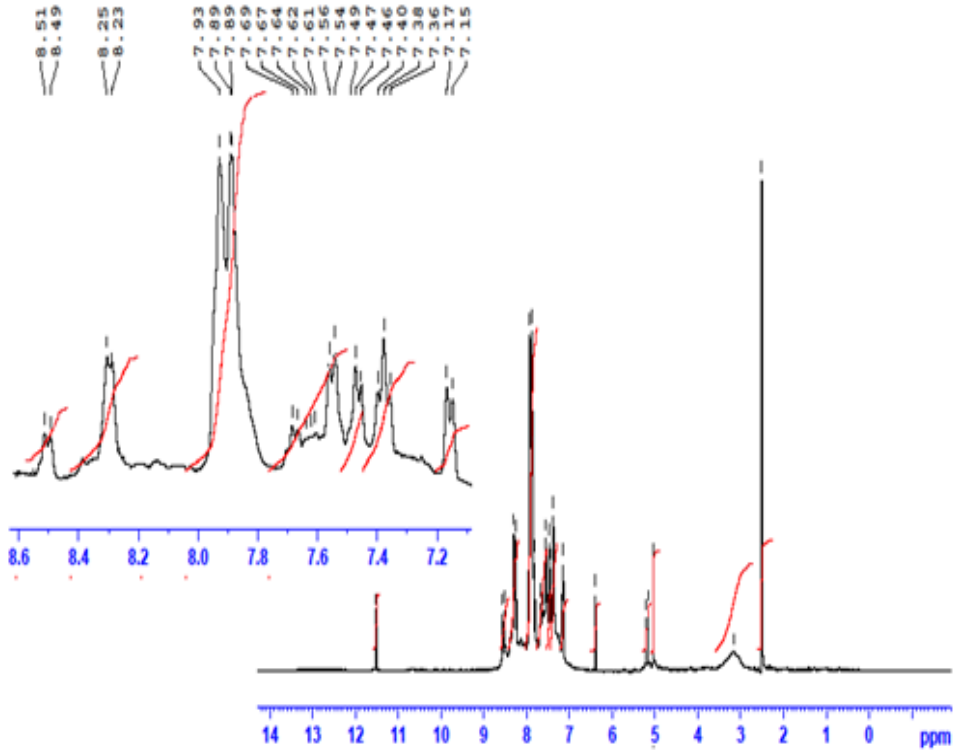

Current Data Parameters  
NAME Jan19-2020  
EXNO 230  
PROCNO 1

F2 - Acquisition Parameters  
Date\_ 20200129  
Time 14.25  
INSTRUM spect  
PROBHD 5 mm F400/ BBO  
PULPROG zgpg30  
TD 65536  
SOLVENT DMSO  
NS 25  
DS 2  
EMV 8612.820 Hz  
FIDRES 0.122264 Hz  
AQ 4.989465 sec  
RG 199.24  
SW 62.400 usec  
DE 6.50 usec  
TE 318.1 K  
D1 1.0000000 sec  
TDO 1

----- CHANNEL f1 -----  
SFO1 400.1324710 MHz  
NUC1 1H  
P1 12.00 usec  
PLM1 22.00000000 W

F2 - Processing parameters  
SI 65536  
SF 400.1300000 MHz  
WDW EM  
SSB 0  
LB 0.30 Hz  
GB 0  
PC 1.00

Figure S37: <sup>1</sup>H NMR Spectroscopy of Compound 10h

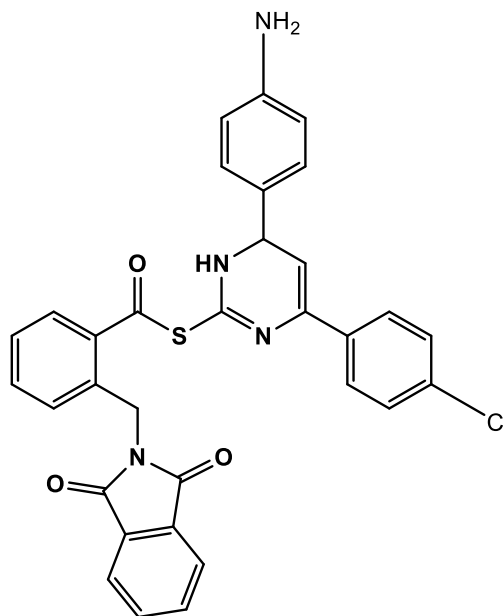

MA-10h  
proton\_su DMSO {C:\nmr-data} student 19

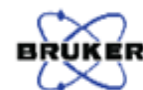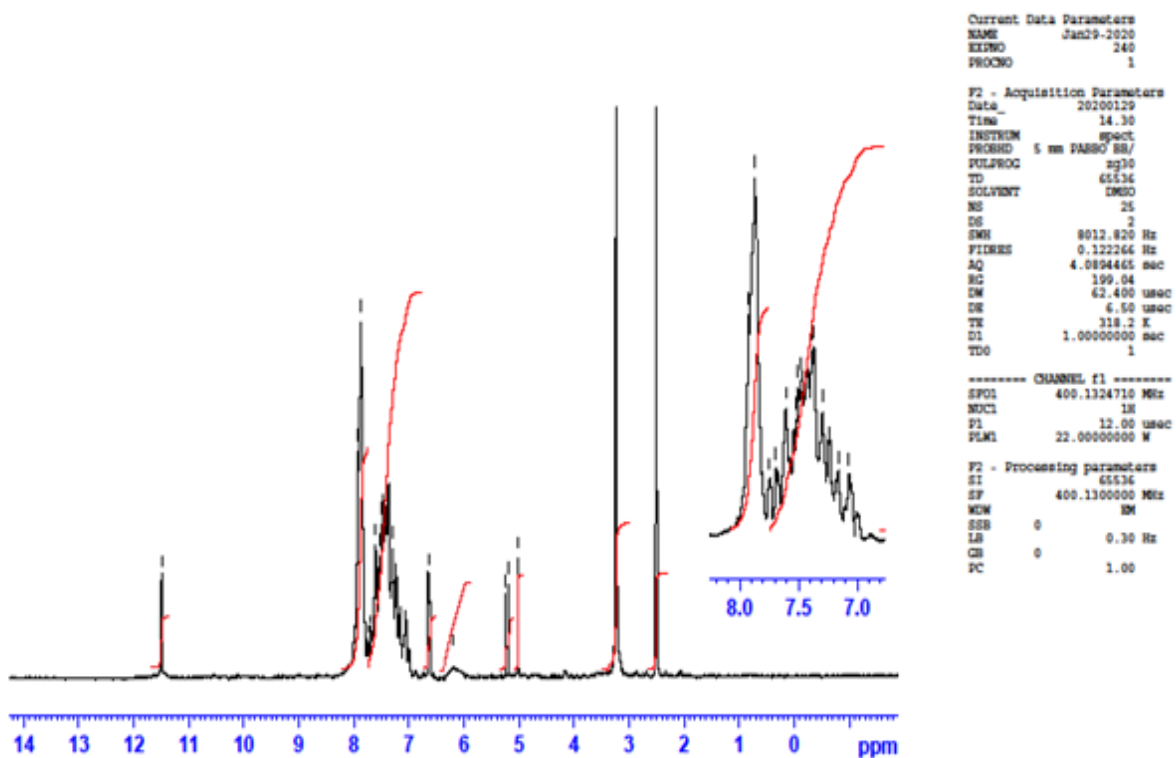

**Figure S38:**  $^1\text{H}$  NMR Spectroscopy of Compound **10i**

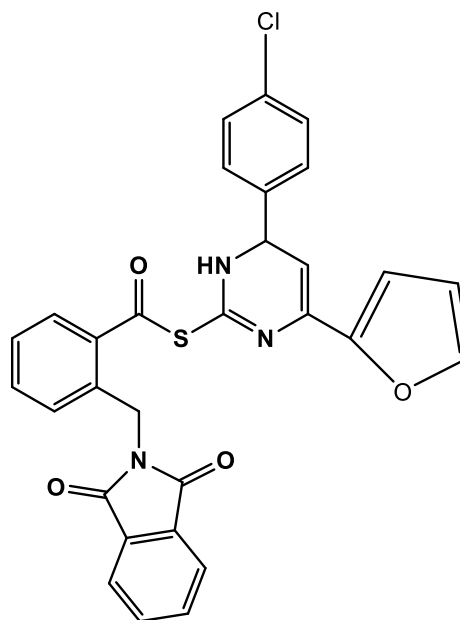

MA-10i  
proton\_su DMSO (C:\nmr-data) Student 14

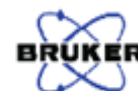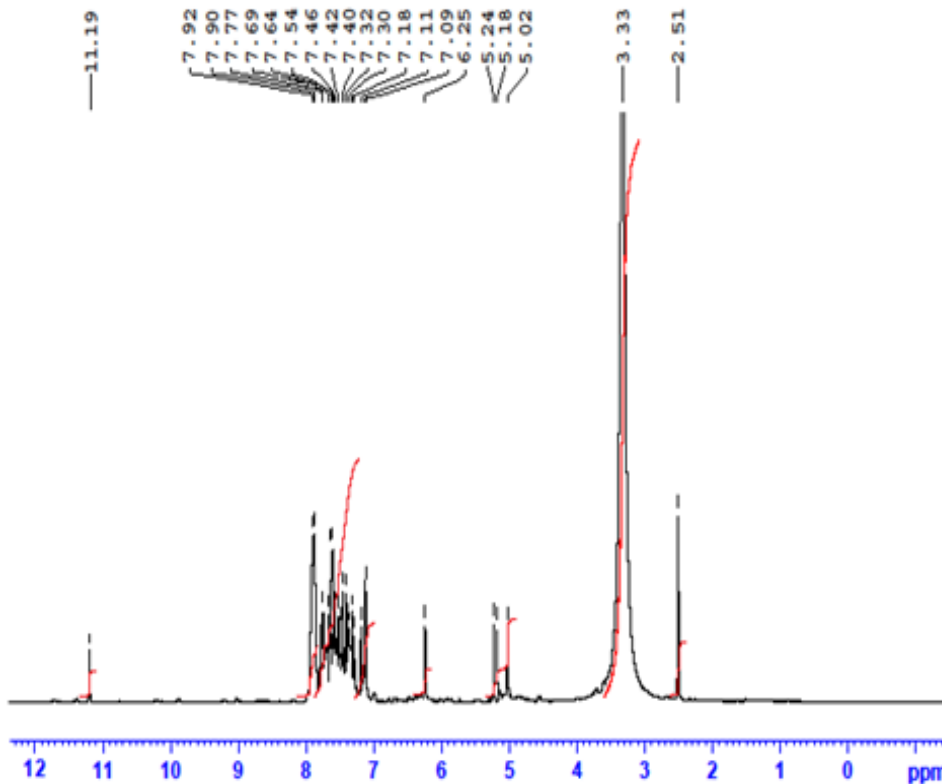

Current Data Parameters  
NAME Jan29-2020  
EXPNO 190  
PROCNO 1

F2 - Acquisition Parameters  
Date\_ 20200129  
Time 14.05  
INSTRUM spect  
PROBHD 5 mm PABBO BB/  
PULPROG zg30  
TD 65536  
SOLVENT DMSO  
NS 25  
DS 2  
SWH 8012.820 Hz  
FIDRES 0.122264 Hz  
AQ 4.9894465 sec  
RG 106.18  
DM 62.400 usec  
DE 6.50 usec  
TE 318.2 K  
D1 1.00000000 sec  
TD0 1

\*\*\*\*\* CHANNEL f1 \*\*\*\*\*  
SFO1 400.1324710 MHz  
NUC1 1H  
P1 12.00 usec  
PLM1 22.00000000 W

F2 - Processing parameters  
SI 65536  
SF 400.1300000 MHz  
WDW HM  
SSB 0  
LB 0.30 Hz  
GB 0  
PC 1.00

Figure S39: <sup>1</sup>H NMR Spectroscopy of Compound 10j

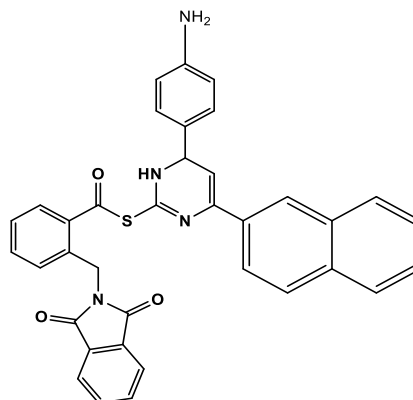

MA-10j  
proton\_su DMSO {C:\nmr-data} Student 20

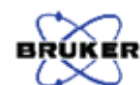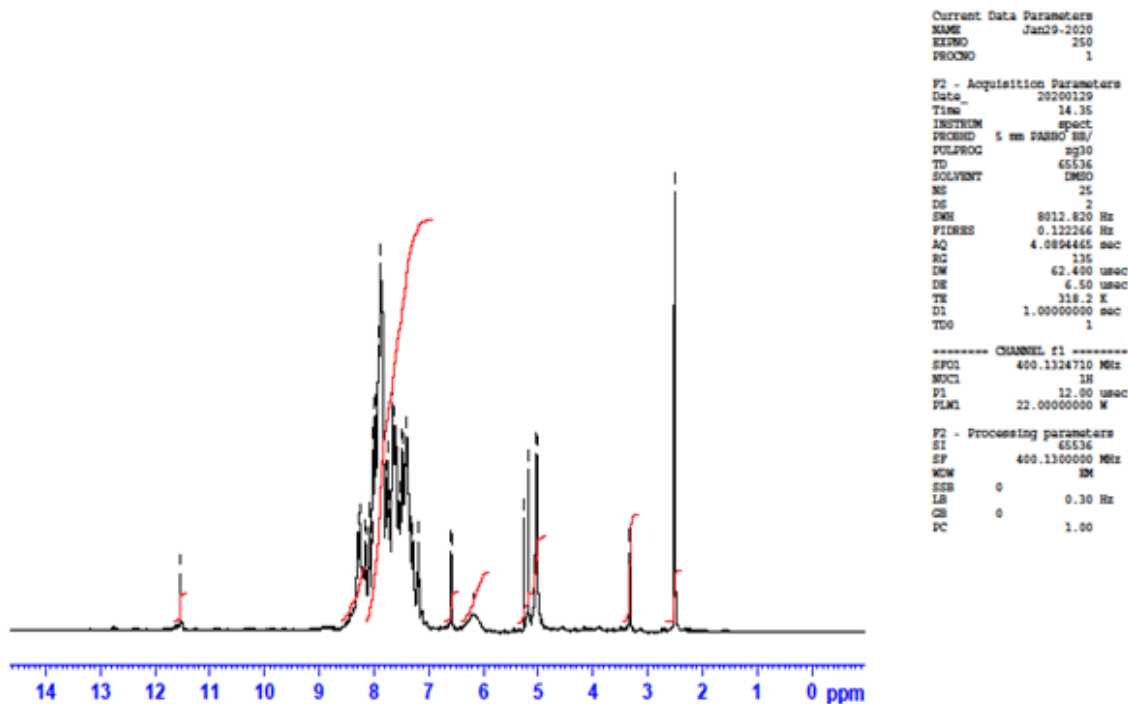

# <sup>13</sup>C NMR Spectroscopy

Figure S40: <sup>13</sup>C NMR Spectroscopy of Compound 5a

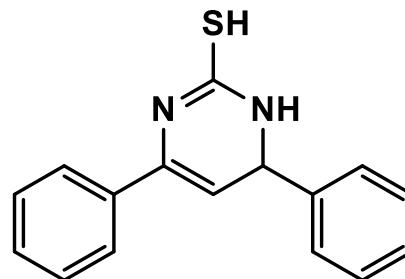

MA- 5a  
c13\_su CDC13 (C:\nmr-data) Student 23

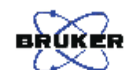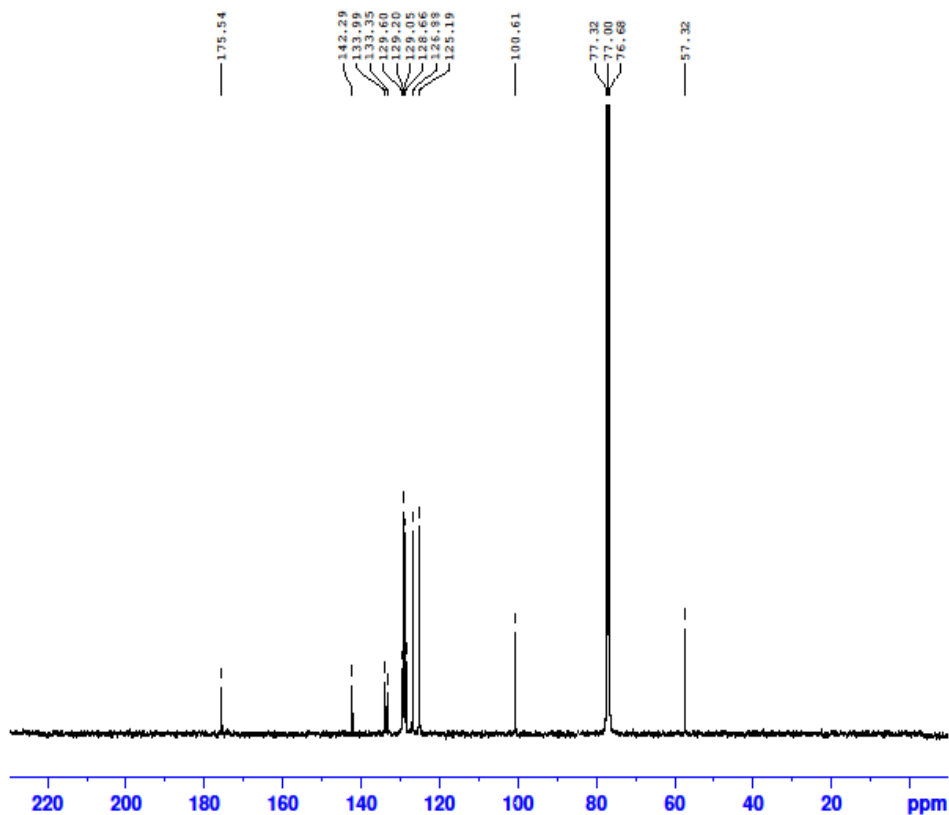

Current Data Parameters  
NAME Jan27-2020  
EXPNO 40  
PROCNO 1

F2 - Acquisition Parameters  
Date\_ 20200128  
Time 4.48  
INSTRUM spect  
PROBHD 5 mm PABBO BB/  
PULPROG zgpg30  
TD 65536  
SOLVENT CDCl3  
NS 3200  
DS 4  
SWH 24038.461 Hz  
FIDRES 0.366798 Hz  
AQ 1.3631488 s  
RG 100.43  
DW 20.800 us  
DE 6.50 us  
TE 308.2 K  
D1 2.00000000 s  
D11 0.03000000 s  
TD0 1

==== CHANNEL f1 ====  
SFO1 100.6238364 MHz  
NUC1 13C  
P1 9.50 us  
PLW1 56.00000000 W

==== CHANNEL f2 ====  
SFO2 400.1316005 MHz  
NUC2 1H  
CPDPRG2 waltz16  
PCPD2 90.00 us  
PLW2 22.00000000 W  
PLW12 0.41091001 W  
PLW13 0.33284000 W

F2 - Processing parameters  
SI 32768  
SF 100.6127690 MHz  
WDW EM  
SSB 0  
LB 6.00 Hz  
GB 0  
PC 1.40



**Figure S41:**  $^{13}\text{C}$  NMR Spectroscopy of Compound **5d**



MA- 5d  
c13\_su CDC13 (C:\nmr-data) Student 20

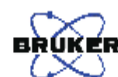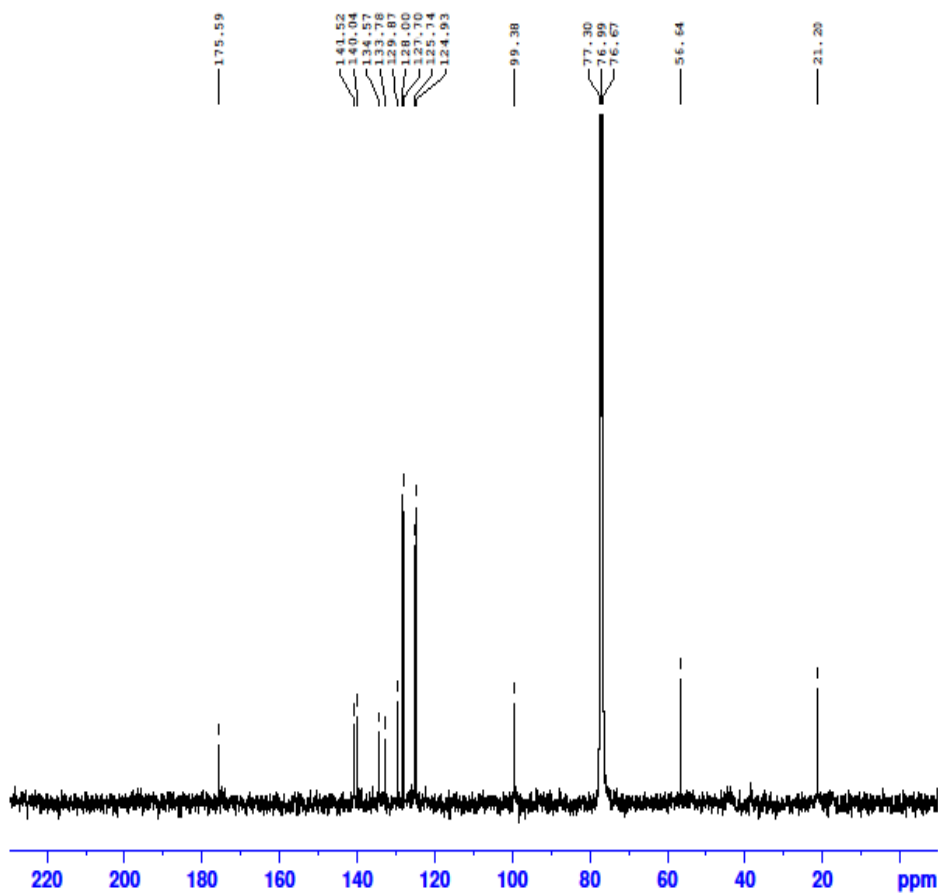

Current Data Parameters  
NAME Jan27-2020  
EXPNO 10  
PROCNO 1

F2 - Acquisition Parameters  
Date\_ 20200127  
Time 19.27  
INSTRUM spect  
PROBHD 5 mm PABBO BB/  
PULPROG zgpg30  
TD 65536  
SOLVENT CDCl3  
NS 3200  
DS 4  
SWH 24038.461 Hz  
FIDRES 0.366798 Hz  
AQ 1.3631488 s  
RG 100.43  
DW 20.800 s  
DE 6.50 s  
TE 308.2 K  
D1 2.00000000 s  
D11 0.03000000 s  
TD0 1

==== CHANNEL f1 ====  
SFO1 100.6238364 MHz  
NUC1 13C  
P1 9.50 s  
PLW1 56.00000000 W

==== CHANNEL f2 ====  
SFO2 400.1316005 MHz  
NUC2 1H  
CPDPRG[2] waltz16  
PCPD2 90.00 s  
PLW2 22.00000000 W  
PLW12 0.41091001 W  
PLW13 0.33284000 W

F2 - Processing parameters  
SI 32768  
SF 100.6127690 MHz  
WDW EM  
SSB 0  
LB 6.00 Hz  
GB 0  
PC 1.40

Figure S42:  $^{13}\text{C}$  NMR Spectroscopy of Compound 5g

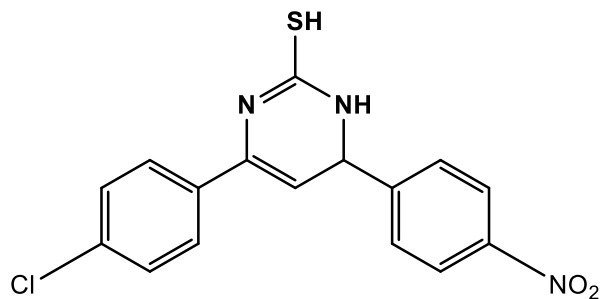

MA- 5g  
c13\_su CDC13 (C:\nmr-data) Student 21

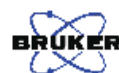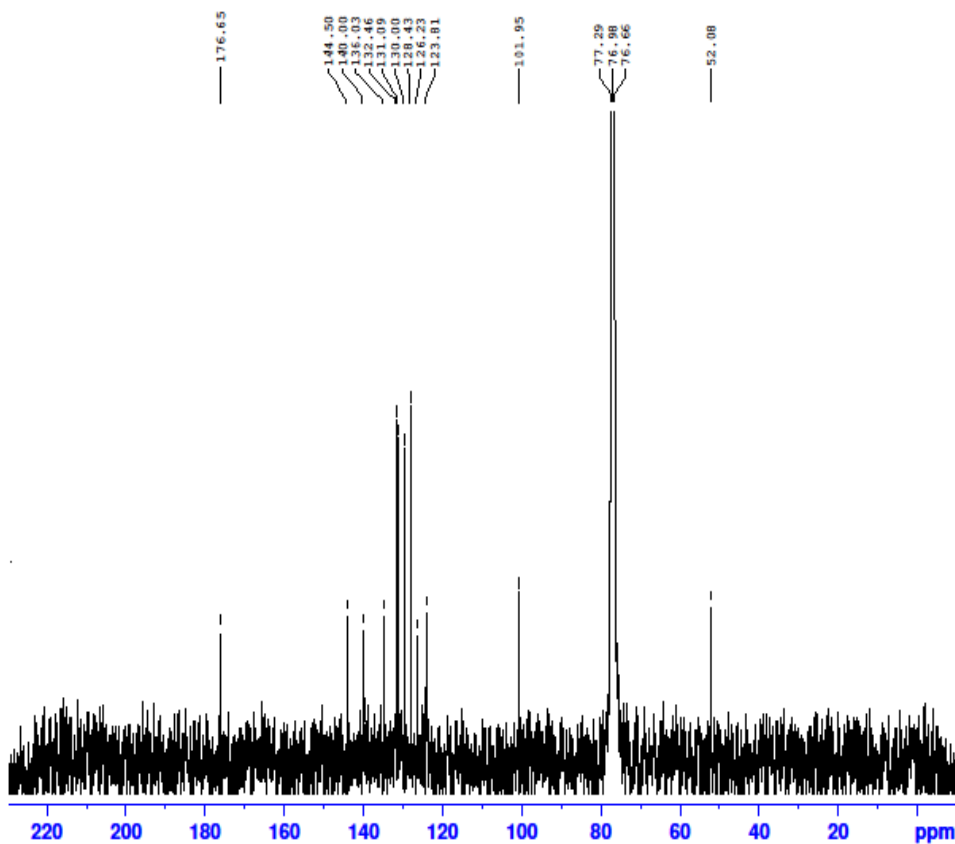

Current Data Parameters  
NAME Jan27-2020  
EXPNO 20  
PROCNO 1

F2 - Acquisition Parameters  
Date\_ 20200127  
Time 22.35  
INSTRUM spect  
PROBHD 5 mm PABBO BB/  
PULPROG zgpg30  
TD 65536  
SOLVENT CDC13  
NS 3200  
DS 4  
SWH 24038.461 Hz  
FIDRES 0.366798 Hz  
AQ 1.3631488 s  
RG 100.43  
DW 20.800 us  
DE 6.50 us  
TE 308.1 K  
D1 2.00000000 s  
D11 0.03000000 s  
TD0 1

==== CHANNEL f1 ====  
SFO1 100.6238364 MHz  
NUC1 13C  
P1 9.50 us  
PLW1 56.00000000 W

==== CHANNEL f2 ====  
SFO2 400.1316005 MHz  
NUC2 1H  
CPDPRG2 waltz16  
PCPD2 90.00 us  
PLW2 22.00000000 W  
PLW12 0.41091001 W  
PLW13 0.33284000 W

F2 - Processing parameters  
SI 32768  
SF 100.6127690 MHz  
WDW EM  
SSB 0  
LB 6.00 Hz  
GB 0  
PC 1.40

**Figure S43:**  $^{13}\text{C}$  NMR Spectroscopy of Compound **5h**

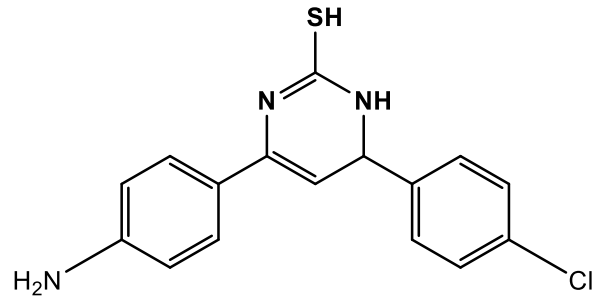

MA-5h  
c13\_su CDCl3 (C:\nmr-data) Student 22

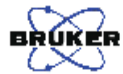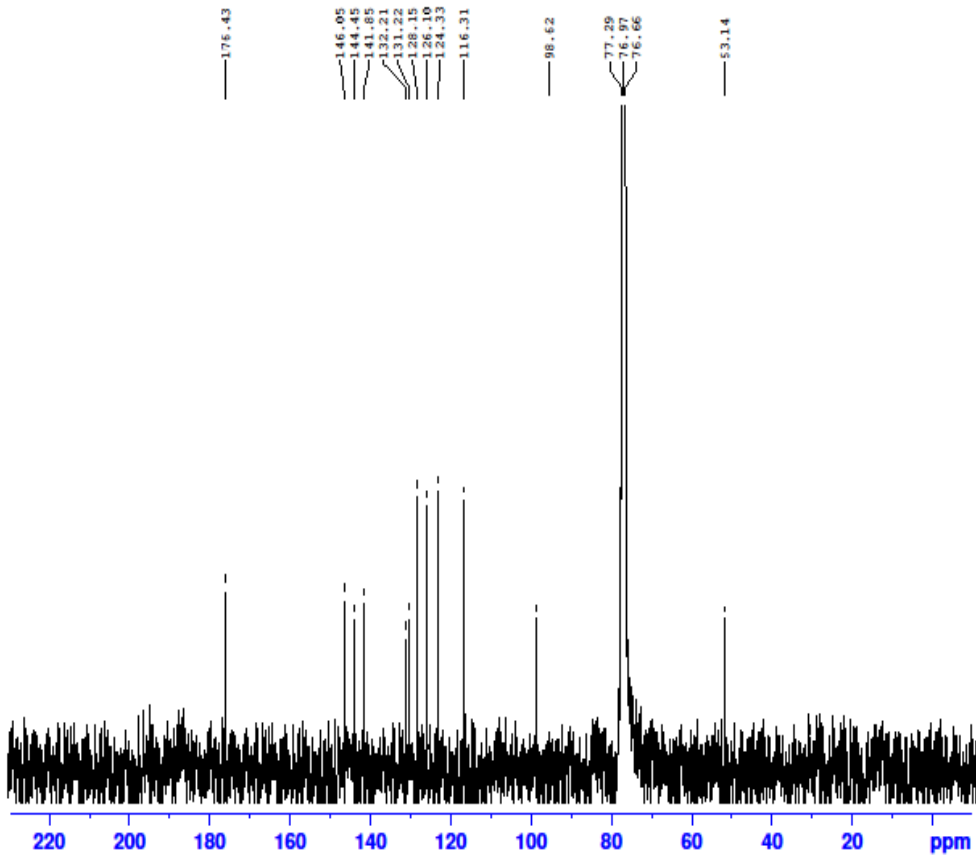

Current Data Parameters  
NAME Jan27-2020  
EXPNO 30  
PROCNO 1

F2 - Acquisition Parameters  
Date\_ 20200128  
Time 1.42  
INSTRUM spect  
PROBHD 5 mm PABBO BB/  
PULPROG zgpg30  
TD 65536  
SOLVENT CDCl3  
NS 3200  
DS 4  
SWH 24038.461 Hz  
FIDRES 0.366798 Hz  
AQ 1.3631488 s  
RG 100.43  
DW 20.800 s  
DE 6.50 s  
TE 308.1 K  
D1 2.00000000 s  
D11 0.03000000 s  
TD0 1

==== CHANNEL f1 ====  
SFO1 100.6238364 MHz  
NUC1 13C  
P1 9.50 s  
PLW1 56.00000000 W

==== CHANNEL f2 ====  
SFO2 400.1316005 MHz  
NUC2 1H  
CPDPRG2 waltz16  
PCPD2 90.00 s  
PLW2 22.00000000 W  
PLW12 0.41091001 W  
PLW13 0.33284000 W

F2 - Processing parameters  
SI 32768  
SF 100.6127690 MHz  
WDW EM  
SSB 0  
LB 6.00 Hz  
GB 0  
PC 1.40

**Figure S44:**  $^{13}\text{C}$  NMR Spectroscopy of Compound **10a**



MA-10a  
c13\_su DMSO (C:\nmr-data) Student 14

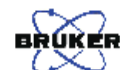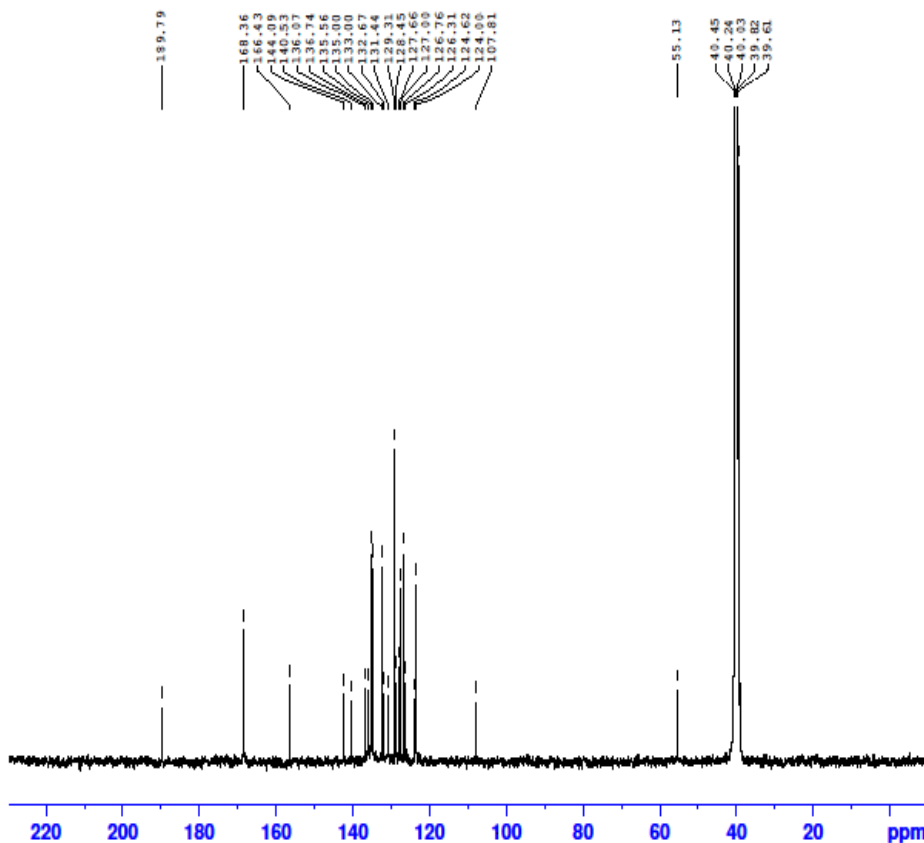

Current Data Parameters  
NAME Feb13-2020  
EXPNO 190  
PROCNO 1

F2 - Acquisition Parameters  
Date\_ 20200216  
Time 3.14  
INSTRUM spect  
PROBHD 5 mm FAPBO BB/  
PULPROG zgpg30  
TD 65536  
SOLVENT DMSO  
NS 3200  
DS 4  
SWH 24038.461 Hz  
FIDRES 0.366798 Hz  
AQ 1.3631488 s  
RG 100.43  
DW 20.800 s  
DE 6.50 s  
TE 308.2 K  
D1 2.00000000 s  
D11 0.03000000 s  
TD0 1

==== CHANNEL F1 ====  
SFO1 100.6238364 MHz  
NUC1 13C  
P1 9.50 s  
PLW1 56.00000000 W

==== CHANNEL F2 ====  
SFO2 400.1316005 MHz  
NUC2 1H  
CPCPRG2 waltz16  
PCPD2 90.00 s  
PLW2 22.00000000 W  
PLW12 0.41091001 W  
PLW13 0.33284000 W

F2 - Processing parameters  
SI 32768  
SF 100.6127690 MHz  
WEW EM  
SSB 0  
LB 6.00 Hz  
GB 0  
PC 1.40

Figure S45: <sup>13</sup>C NMR Spectroscopy of Compound 10b

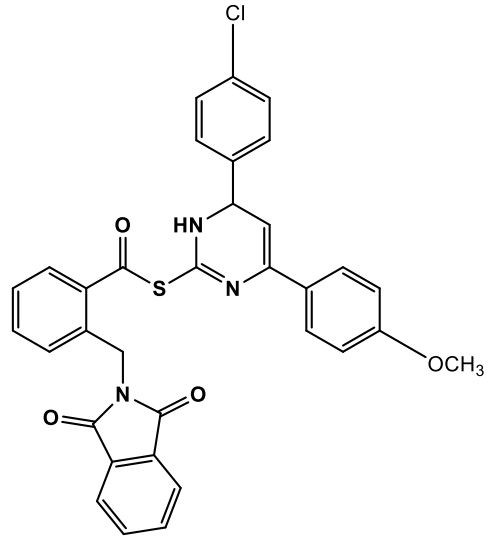

MA-10b  
c13\_su DMSO (C:\nmr-data) Student 13

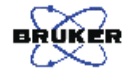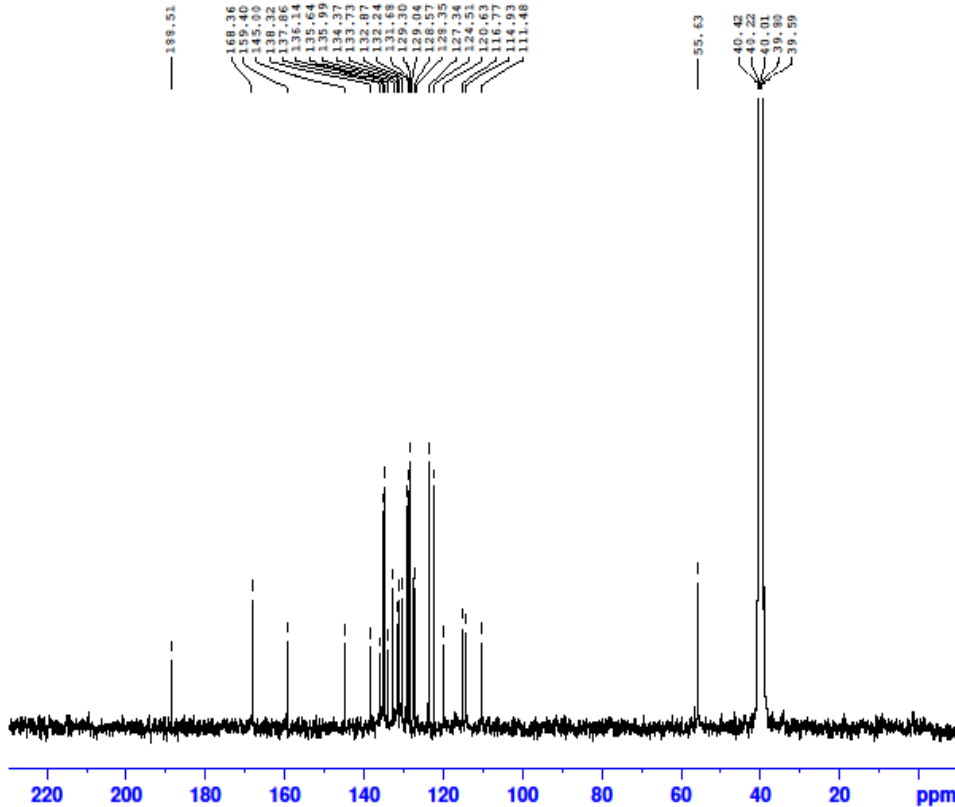

Current Data Parameters  
NAME Feb13-2020  
EXPNO 180  
PROCNO 1

F2 - Acquisition Parameters  
Date\_ 20200216  
Time 0.08  
INSTRUM spect  
PROBHD 5 mm FAPBO BB/  
PULPROG zgpg30  
TD 65536  
SOLVENT DMSO  
NS 3200  
DS 4  
SWH 24038.461 :  
FIDRES 0.366798 :  
AQ 1.3631488 :  
RG 100.43  
DW 20.800 :  
DE 6.50 :  
TE 308.2 :  
D1 2.00000000 :  
D11 0.03000000 :  
TD0 1

==== CHANNEL f1 ====  
SFO1 100.6238364 :  
NUC1 13C  
P1 9.50 :  
PLW1 56.00000000 :  
  
==== CHANNEL f2 ====  
SFO2 400.1316005 :  
NUC2 1H  
CPDPRG[2] waltz16  
PCPD2 90.00 :  
PLW2 22.00000000 :  
PLW12 0.41091001 :  
PLW13 0.33284000 :  
PLW13

F2 - Processing parameters  
SI 32768  
SF 100.6127690 :  
WVW EM  
SFB 0  
LB 6.00 :  
GB 0  
PC 1.40

Figure S46:  $^{13}\text{C}$  NMR Spectroscopy of Compound 10d

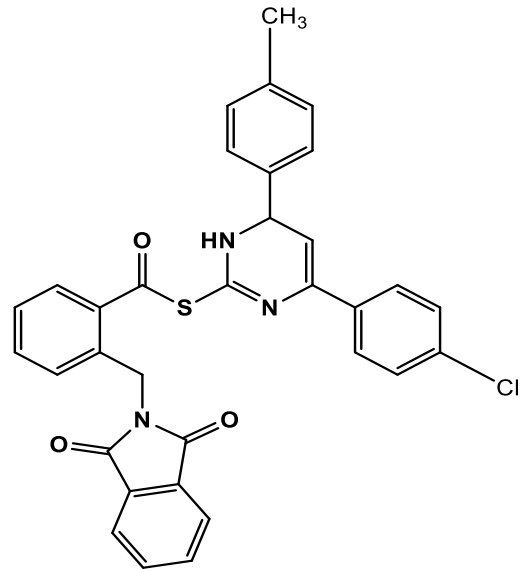

MA- 10d  
c13\_su DMSO (C:\nmr-data) Student 12

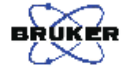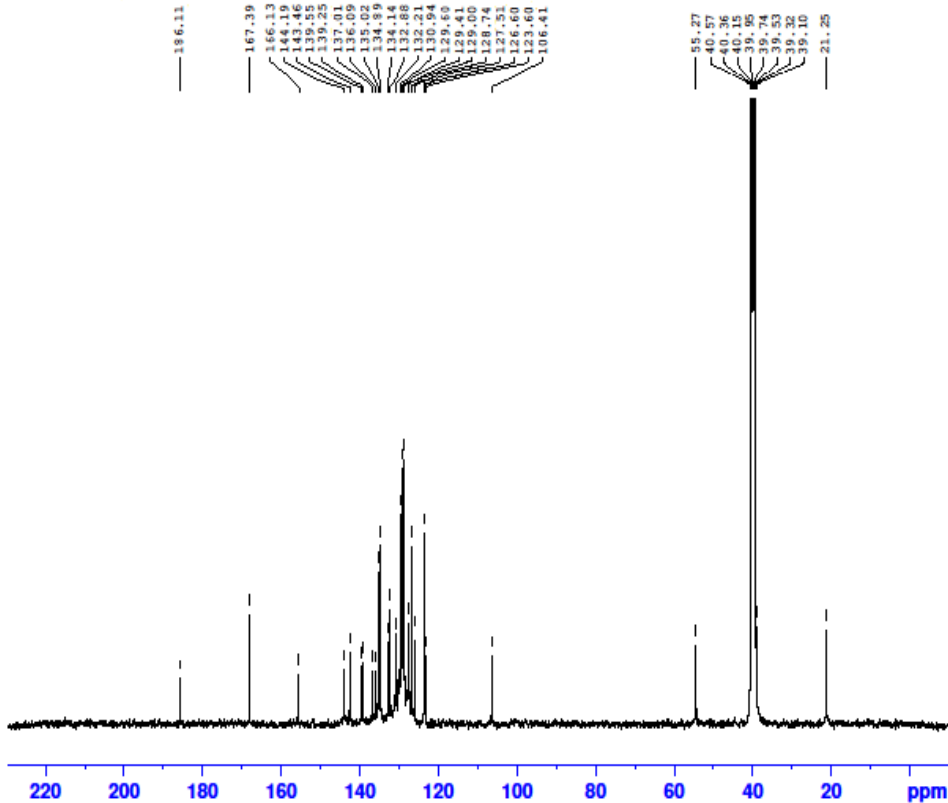

Current Data Parameters  
NAME Feb13-2020  
EXPNO 170  
PROCNO 1

F2 - Acquisition Parameters  
Date\_ 20200215  
Time 21.03  
INSTRUM spect  
PROBHD 5 mm PABBO BB/  
PULPROG zgpg30  
TD 65536  
SOLVENT DMSO  
NS 3200  
DS 4  
SWH 24038.461  
FIDRES 0.366798  
AQ 1.3631488  
RG 100.43  
DW 20.800  
DE 6.50  
TE 308.1  
D1 2.0000000  
D11 0.0300000  
TD0 1

==== CHANNEL f1 ====  
SFO1 100.6238364  
NUC1  $^{13}\text{C}$   
P1 9.50  
PLW1 56.0000000

==== CHANNEL f2 ====  
SFO2 400.1316005  
NUC2  $^1\text{H}$   
CPDPRG2 waltz16  
PCPD2 90.00  
PLW2 22.0000000  
PLW12 0.41091001  
PLW13 0.33284000

F2 - Processing parameters  
SI 32768  
SF 100.6127690  
WDW EM  
SSB 0  
LB 6.00  
GB 0  
PC 1.40

Figure S47: <sup>13</sup>C NMR Spectroscopy of Compound 10g



MA- 10g  
c13\_su DMSO (C:\nmr-data) Student 15

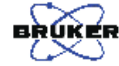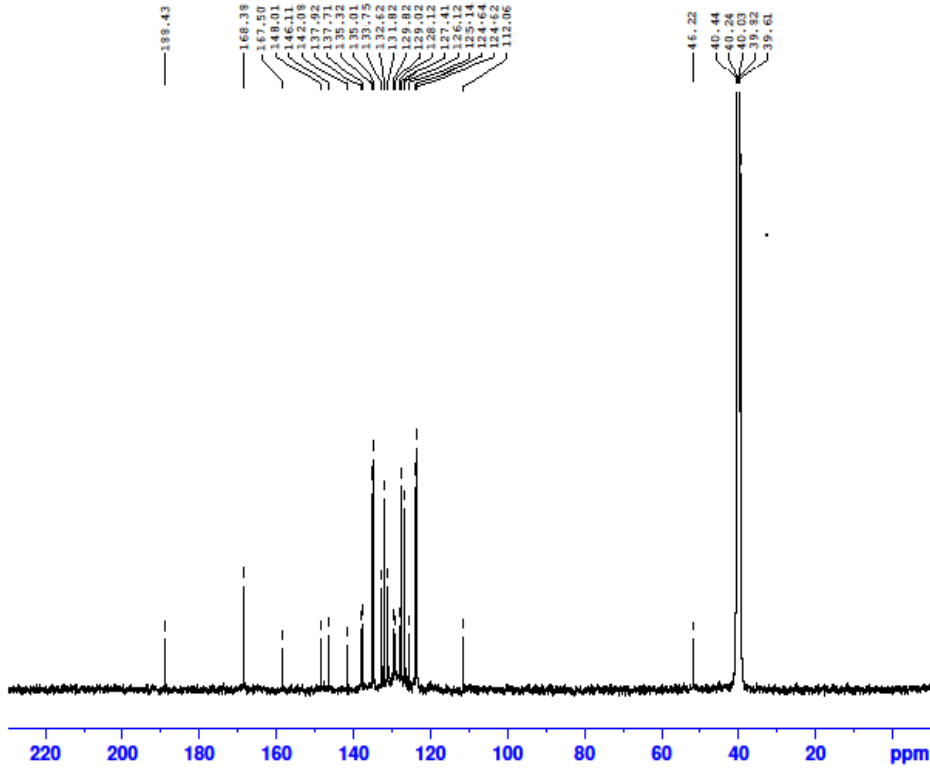

Current Data Parameters  
NAME Feb13-2020  
EXPNO 200  
PROCNO 1

F2 - Acquisition Parameters  
Date\_ 20200216  
Time 6.20  
INSTRUM spect  
PROBHD 5 mm PABBO BB/  
PULPROG zgpg30  
TD 65536  
SOLVENT DMSO  
NS 3200  
DS 4  
SWH 24038.461 Hz  
FIDRES 0.366798 Hz  
AQ 1.3631488 sec  
RG 100.43  
DW 20.800 usec  
DE 6.50 usec  
TE 308.1 K  
D1 2.00000000 sec  
D11 0.03000000 sec  
TD0 1

==== CHANNEL f1 ====  
SFO1 100.6238364 MHz  
NUC1 13C  
P1 9.50 usec  
PLW1 56.00000000 usec

==== CHANNEL f2 ====  
SFO2 400.1316005 MHz  
NUC2 1H  
CPDPRG2 waltz16  
PCPD2 90.00 usec  
PLW2 22.00000000 usec  
PLW12 0.41091001 usec  
PLW13 0.33284000 usec

F2 - Processing parameters  
SI 32768  
SF 100.6127690 MHz  
WDW EM  
SSB 0  
LB 6.00 Hz  
GB 0  
PC 1.40

**Figure S48:**  $^{13}\text{C}$  NMR Spectroscopy of Compound **10j**

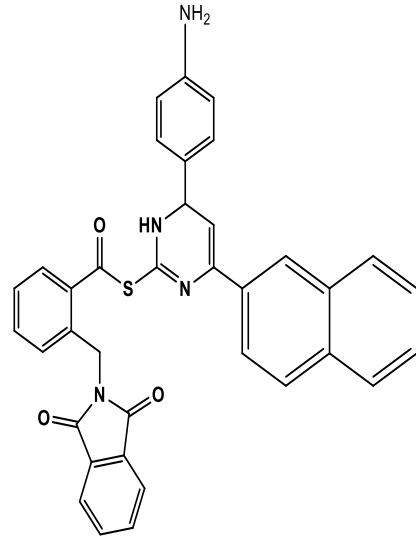

MA-10j  
c13\_su DMSO (C:\nmr-data) Student 16

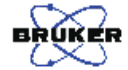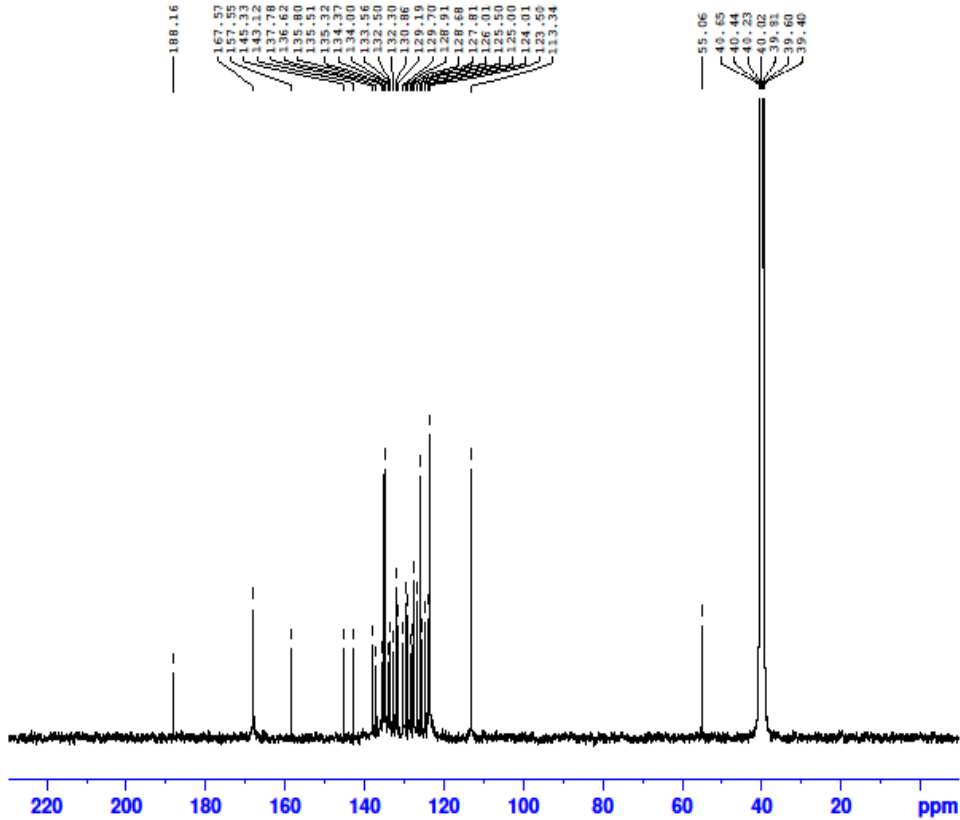

Current Data Parameters  
NAME Feb13-2020  
EXPNO 210  
PROCNO 1

F2 - Acquisition Parameters  
Date\_ 20200216  
Time 9.26  
INSTRUM spect  
PROBHD 5 mm PABBO BB/  
PULPROG zgpg30  
TD 65536  
SOLVENT DMSO  
NS 3200  
DS 4  
SWH 24038.461  
FIDRES 0.366798  
AQ 1.3631488  
RG 100.43  
DW 20.800  
DE 6.50  
TE 308.1  
D1 2.00000000  
D11 0.03000000  
TD0 1

==== CHANNEL f1 ====  
SFO1 100.6238364  
NUC1 13C  
P1 9.50  
PLW1 56.00000000

==== CHANNEL f2 ====  
SFO2 400.1316005  
NUC2 1H  
CPDPRG[2] waltz16  
PCPD2 90.00  
PLW2 22.00000000  
PLW12 0.41091001  
PLW13 0.33284000

F2 - Processing parameters  
SI 32768  
SF 100.6127690  
WDW EM  
SSB 0  
LB 6.00  
GB 0  
PC 1.40



# Mass Spectroscopy

Figure S49: Mass Spectroscopy of Compound 5b

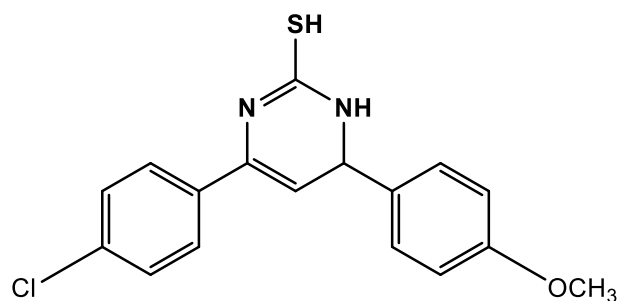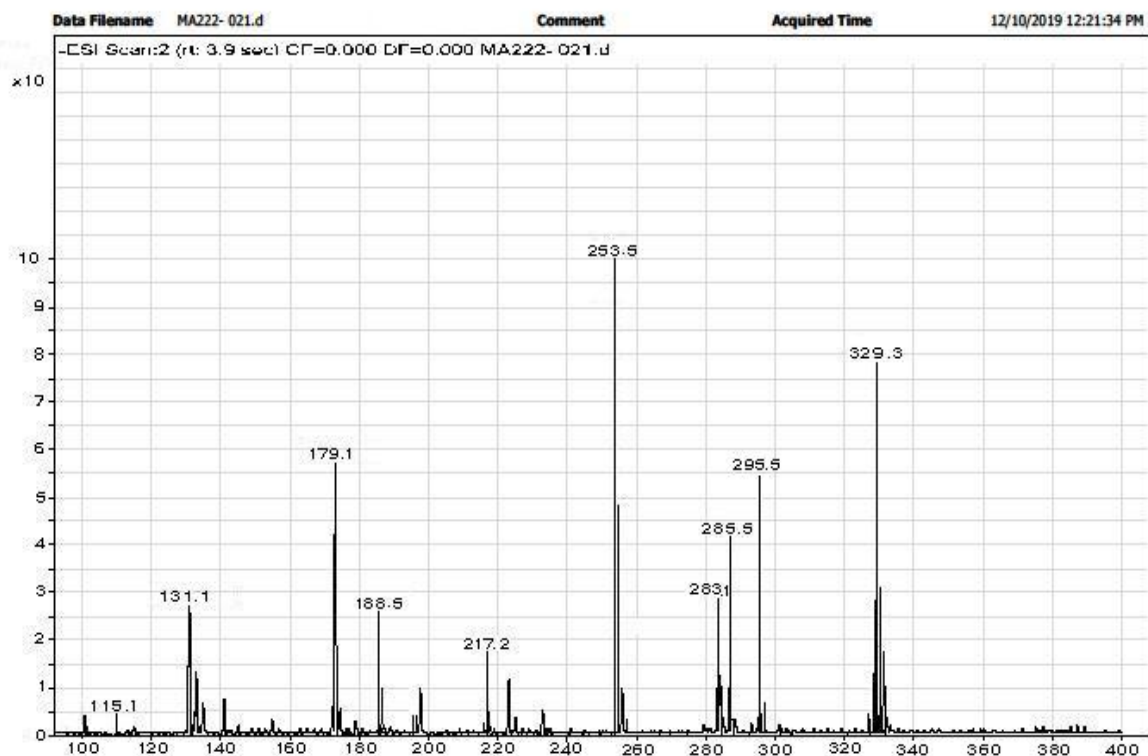

**Figure S50: Mass Spectroscopy of Compound 5c**

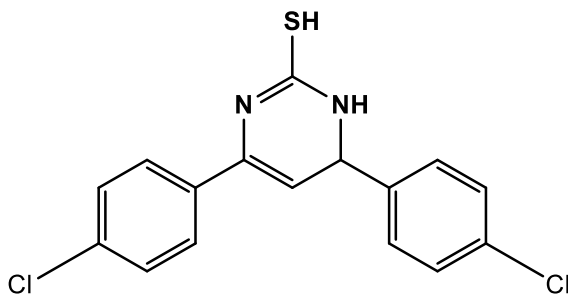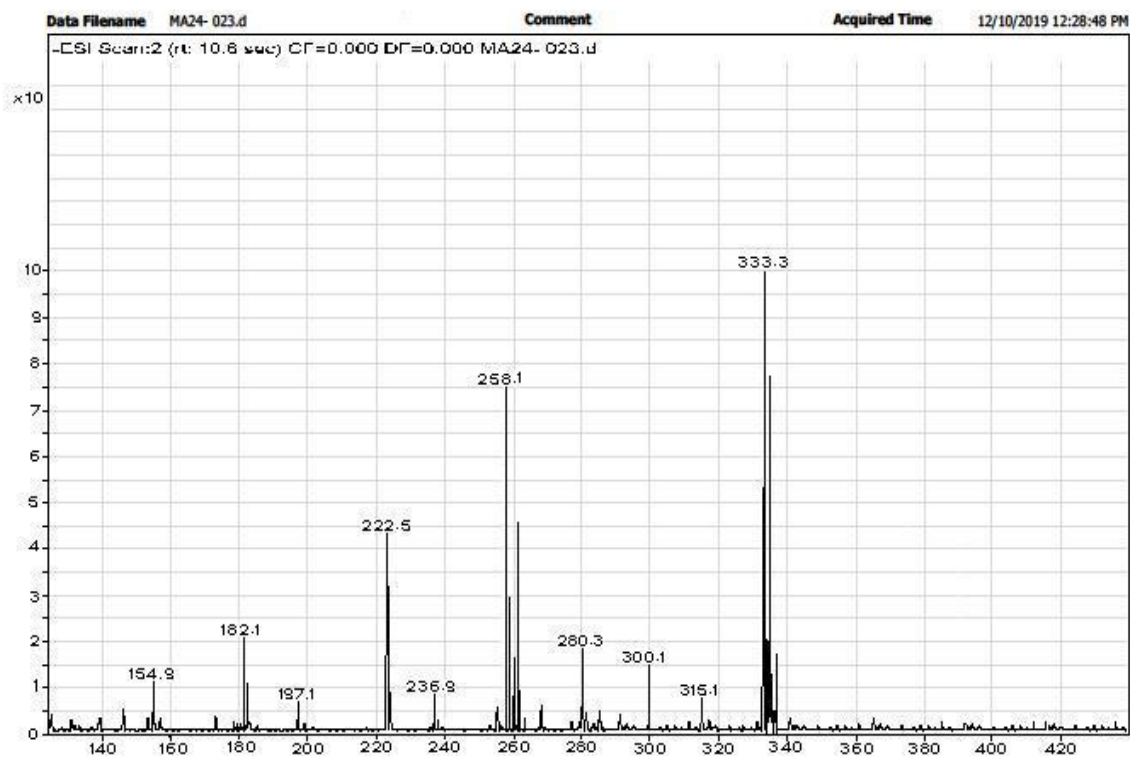

**Figure S51: Mass Spectroscopy of Compound 5d**

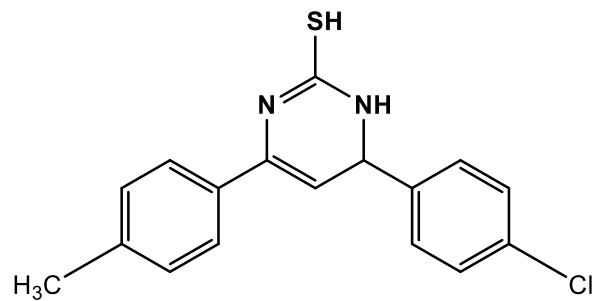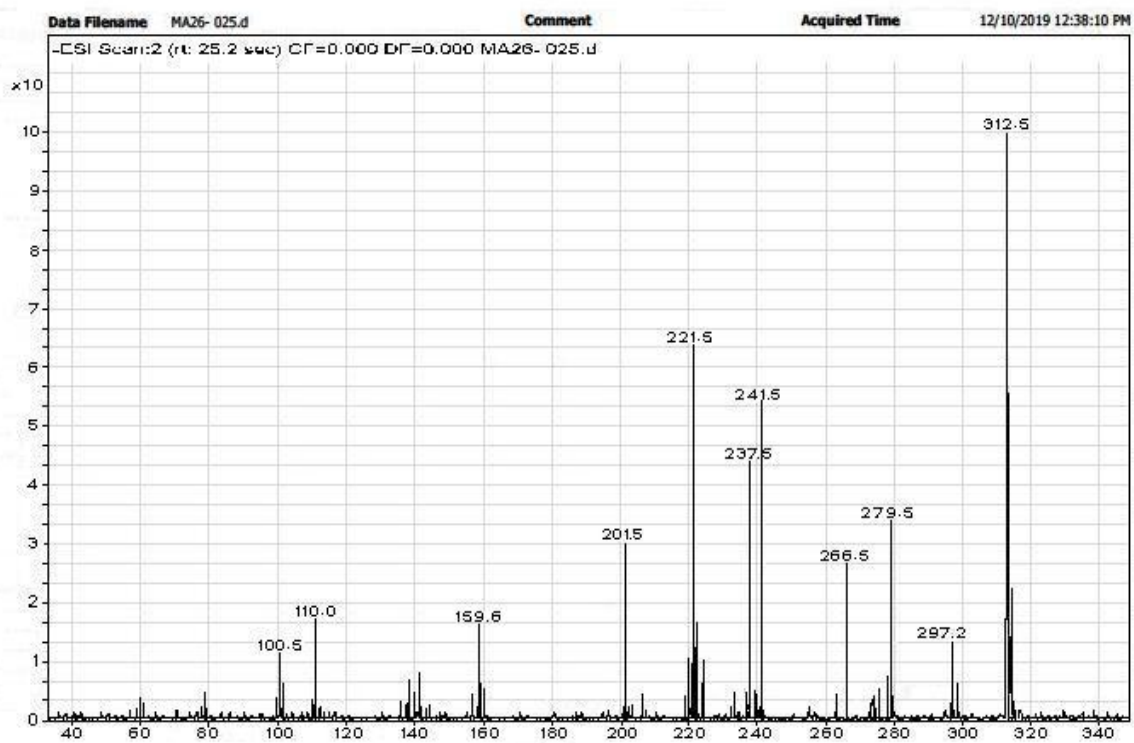

**Figure S52: Mass Spectroscopy of Compound 5e**

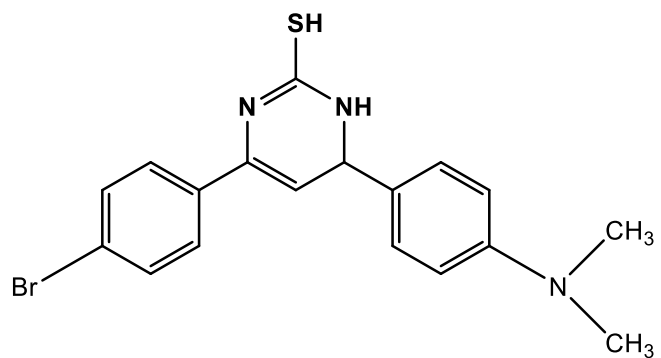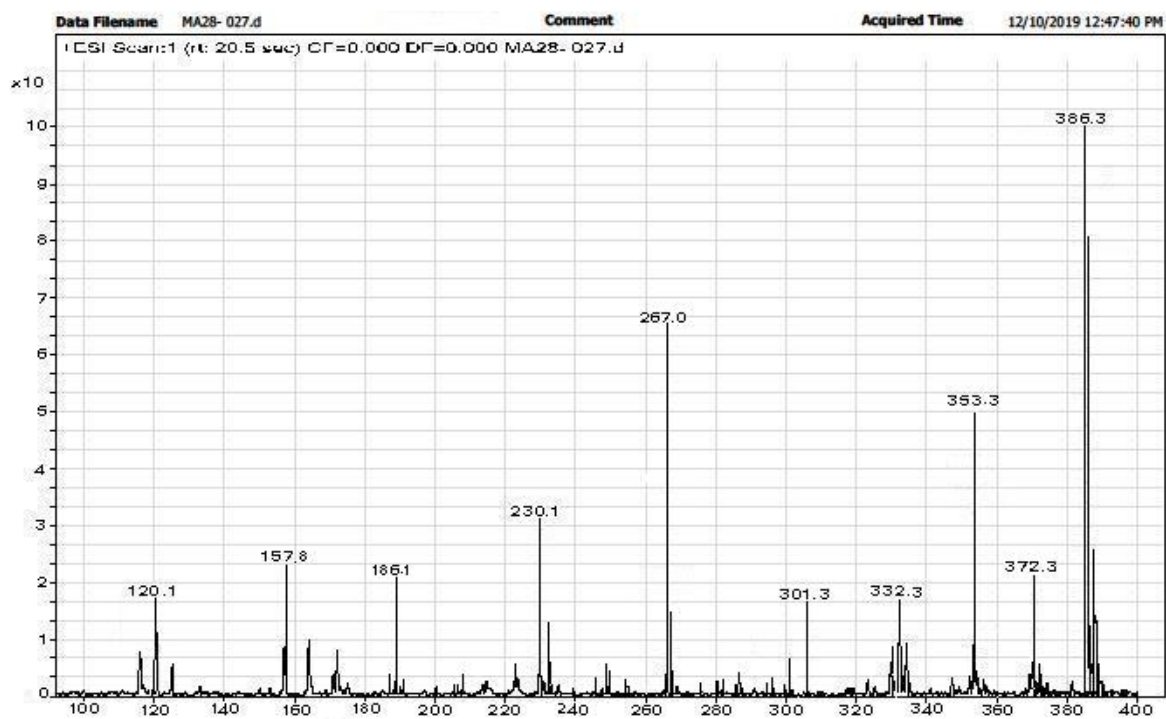

**Figure S53: Mass Spectroscopy of Compound 5f**

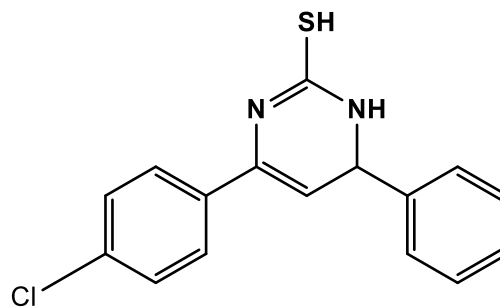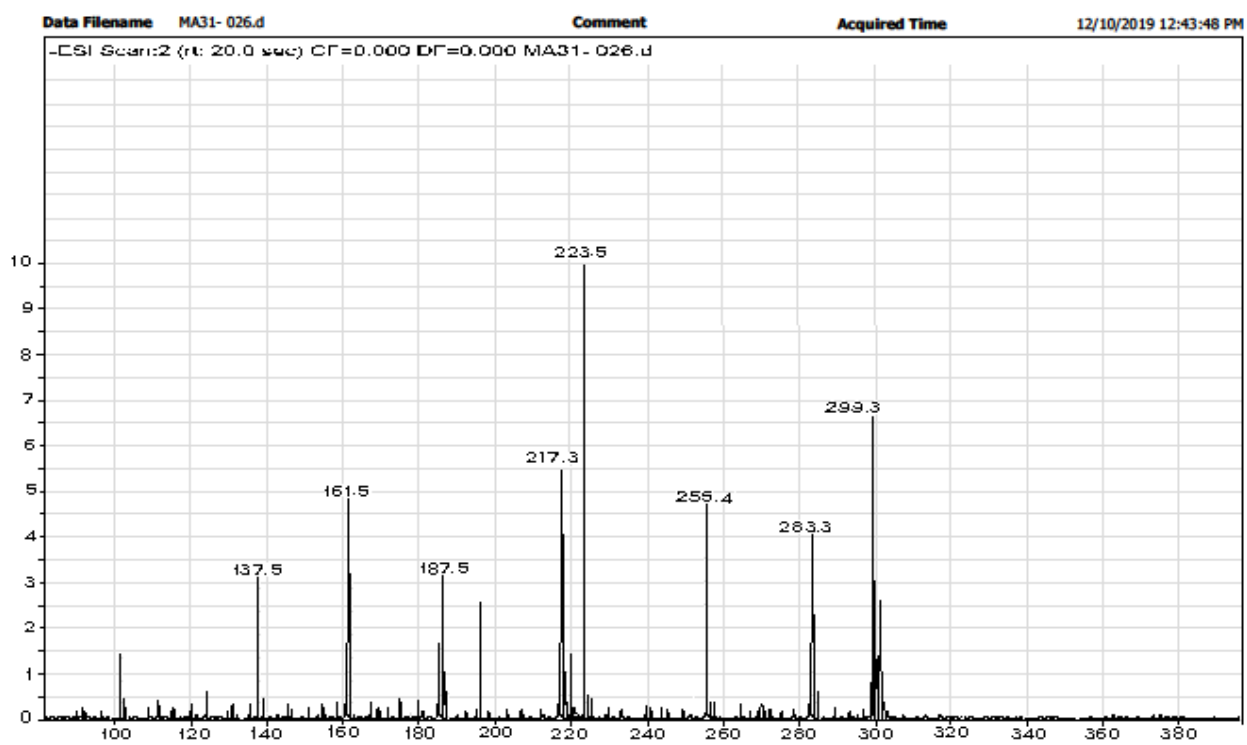

**Figure S54: Mass Spectroscopy of Compound 5g**

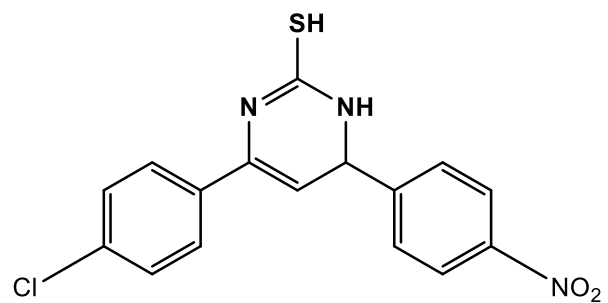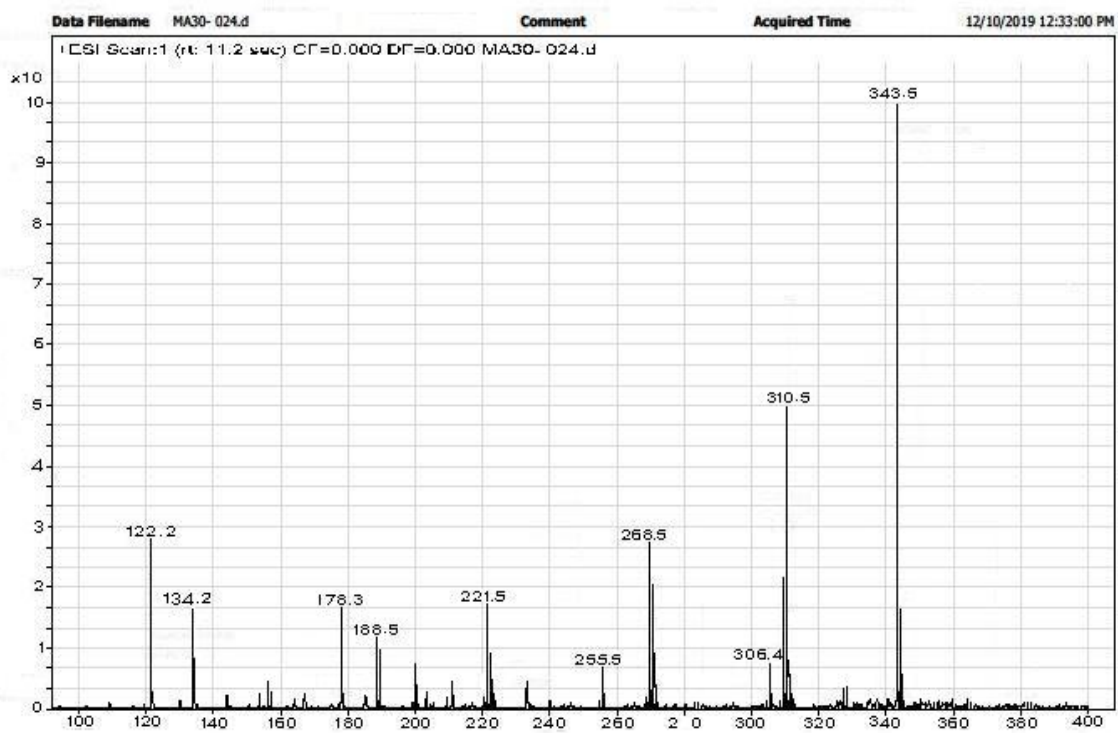

**Figure S55: Mass Spectroscopy of Compound 5h**

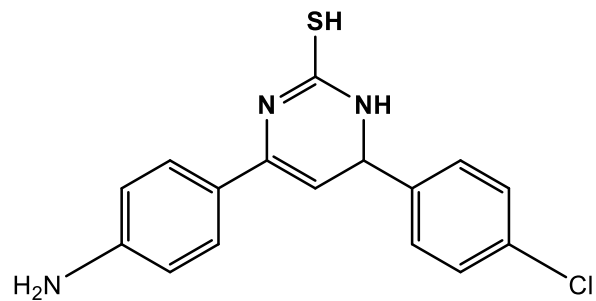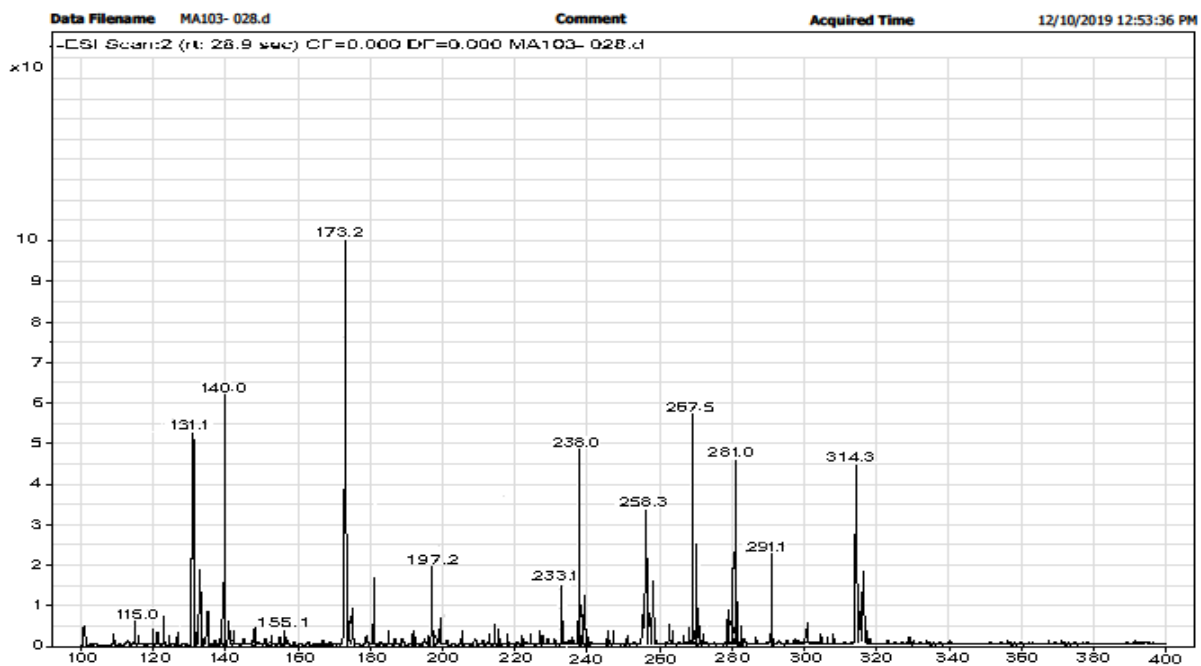

**Figure S56: Mass Spectroscopy of Compound 5i**

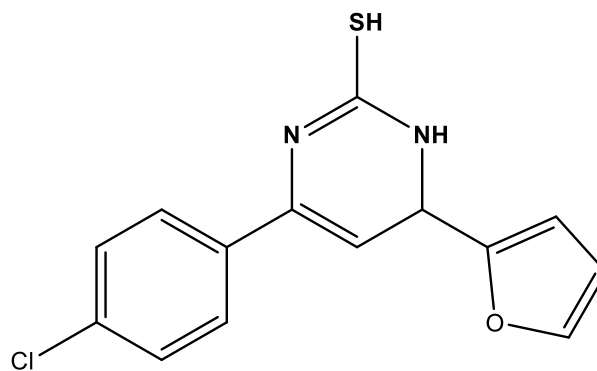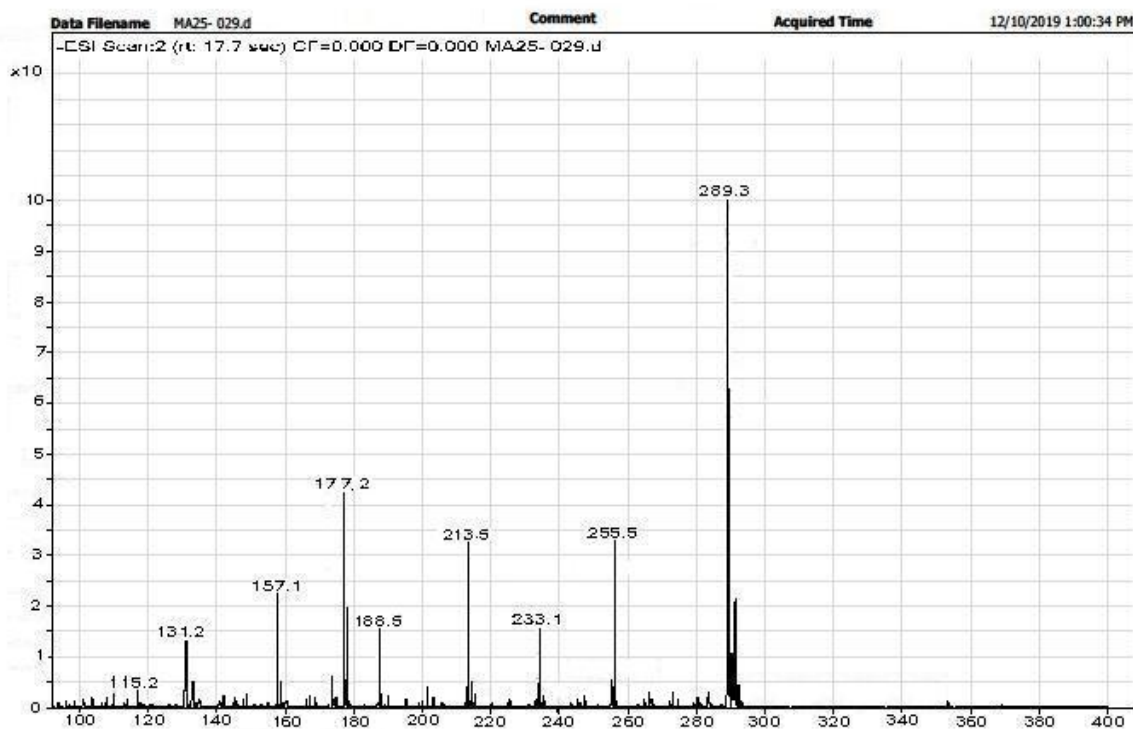



**Figure S57: Mass Spectroscopy of Compound 5j**

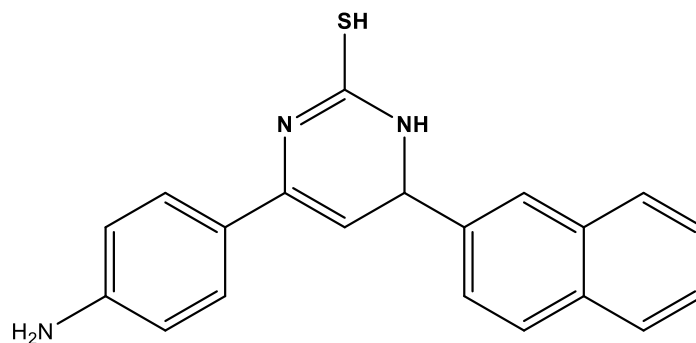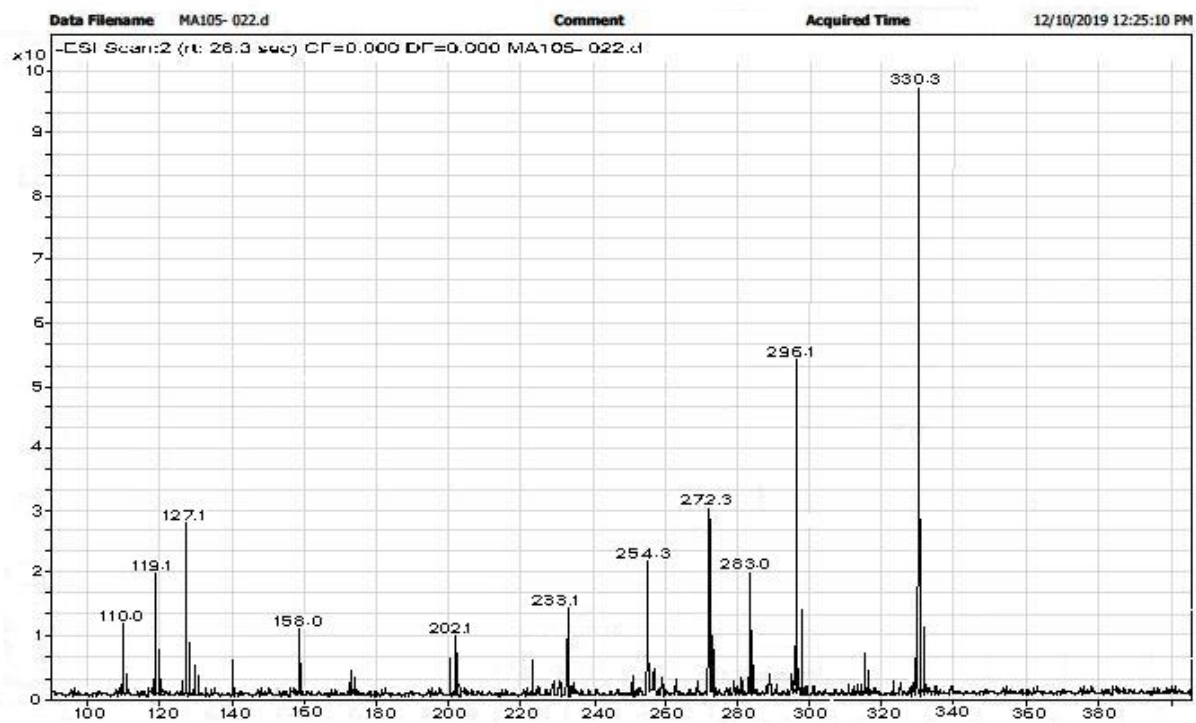

**Figure S58: Mass Spectroscopy of Compound 10a**

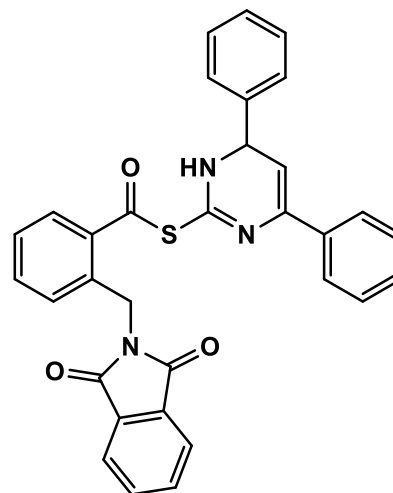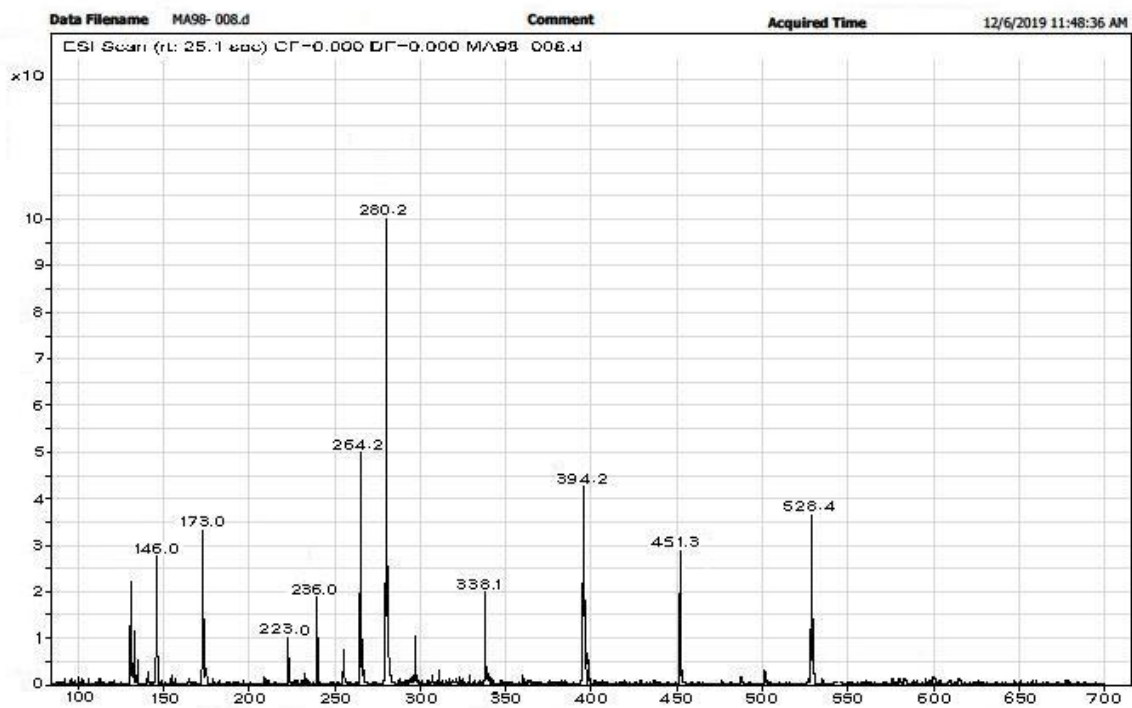

**Figure S59: Mass Spectroscopy of Compound 10b**

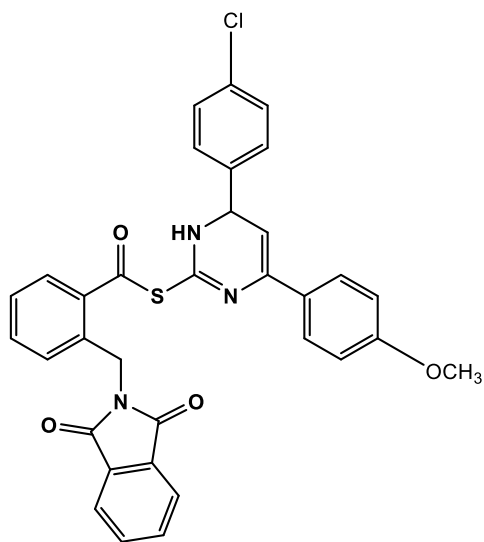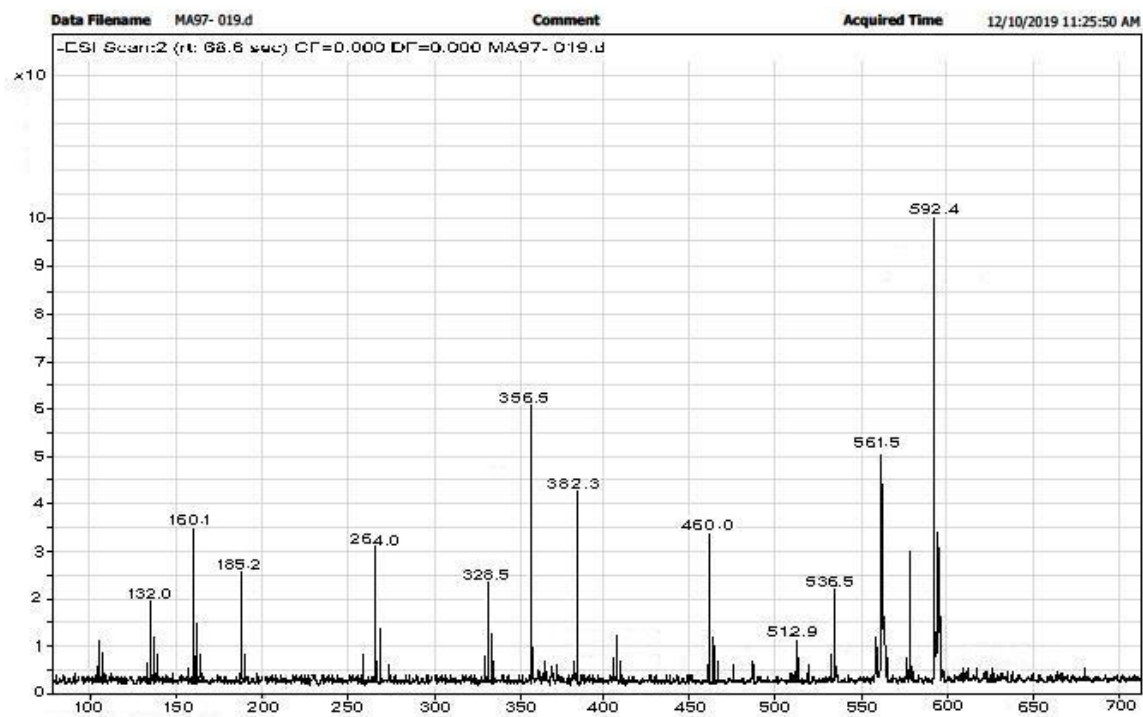

**Figure S60: Mass Spectroscopy of Compound 10c**

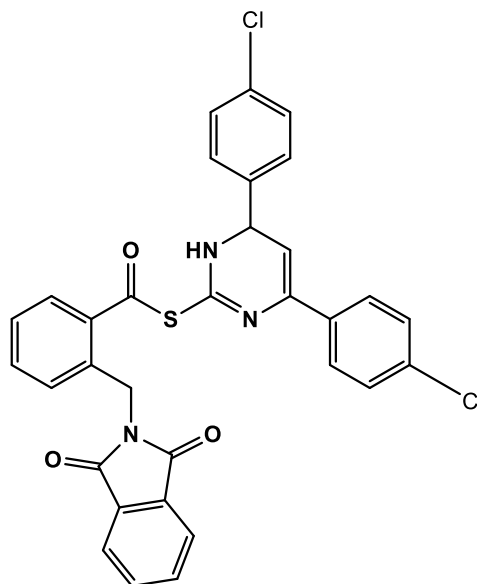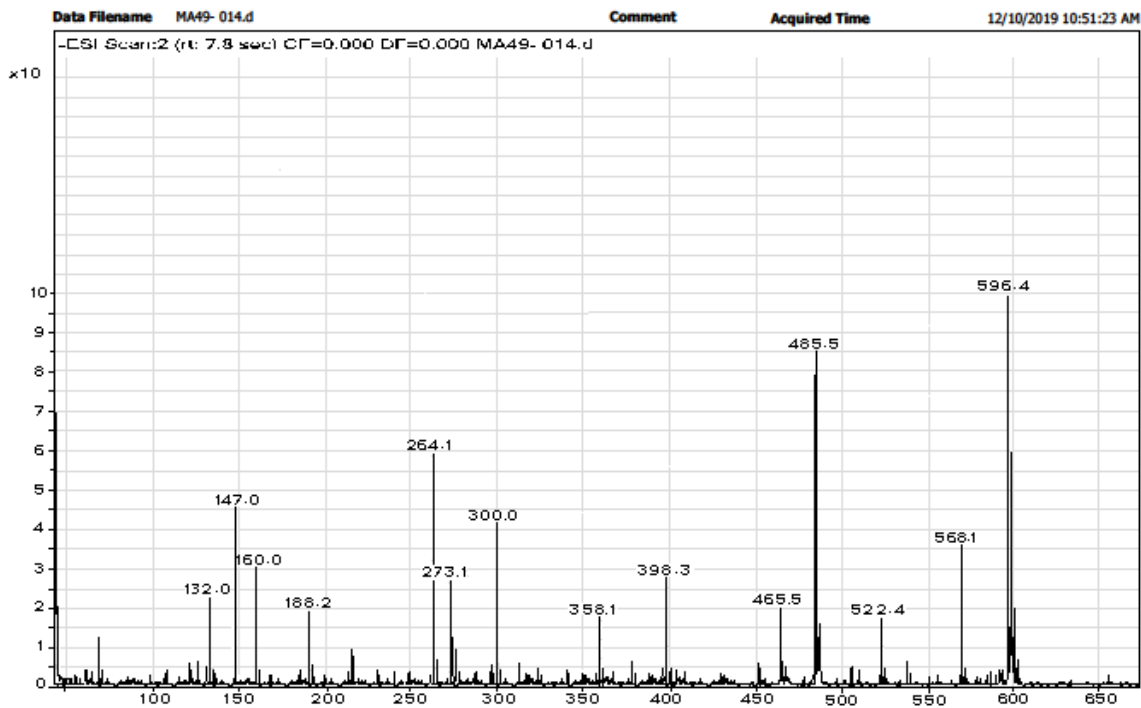

**Figure S61: Mass Spectroscopy of Compound 10d**

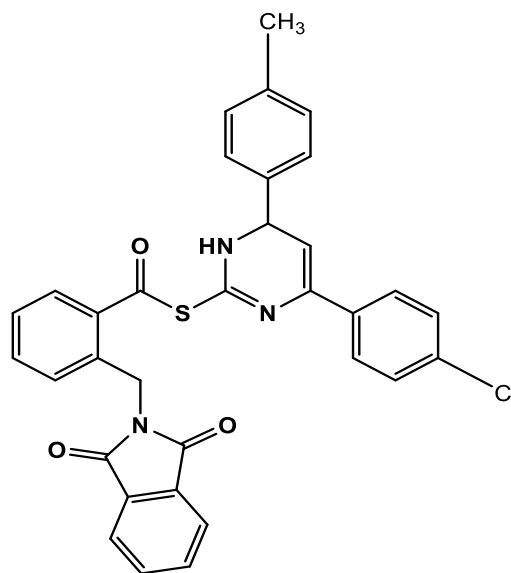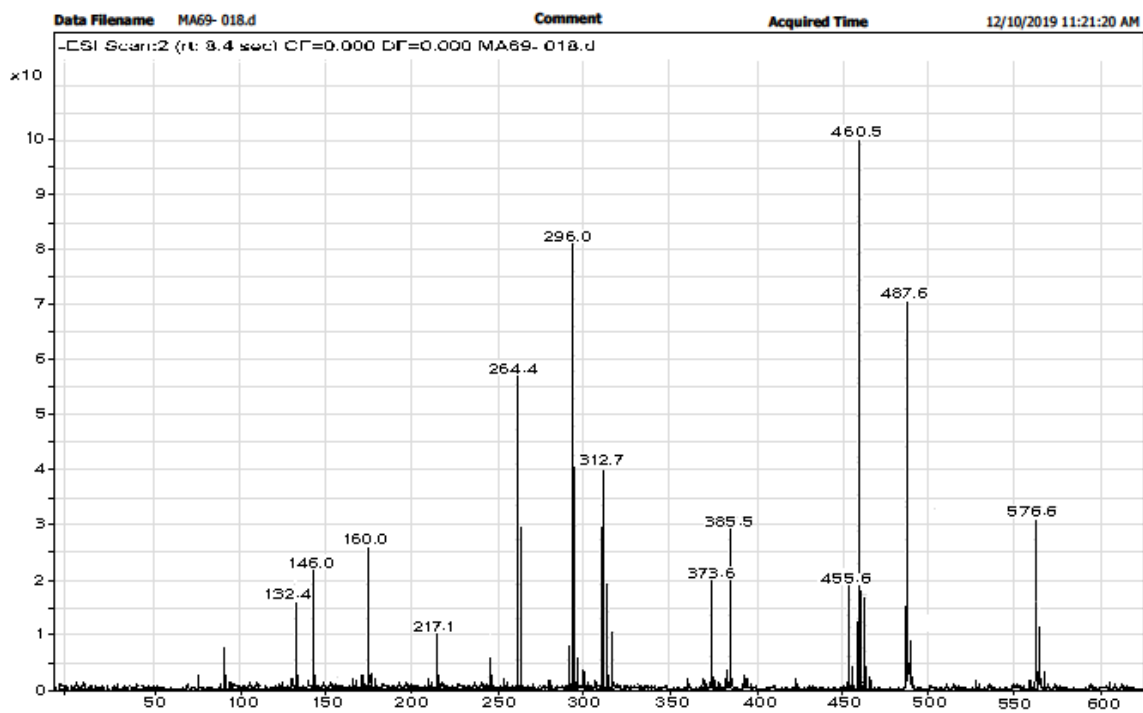

**Figure S62: Mass Spectroscopy of Compound 10e**

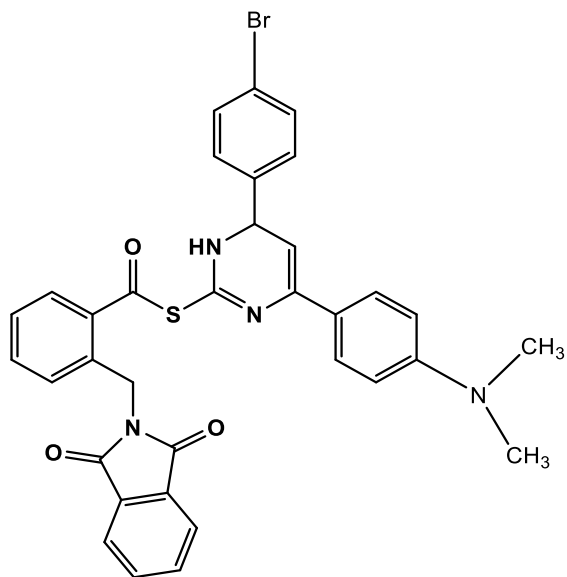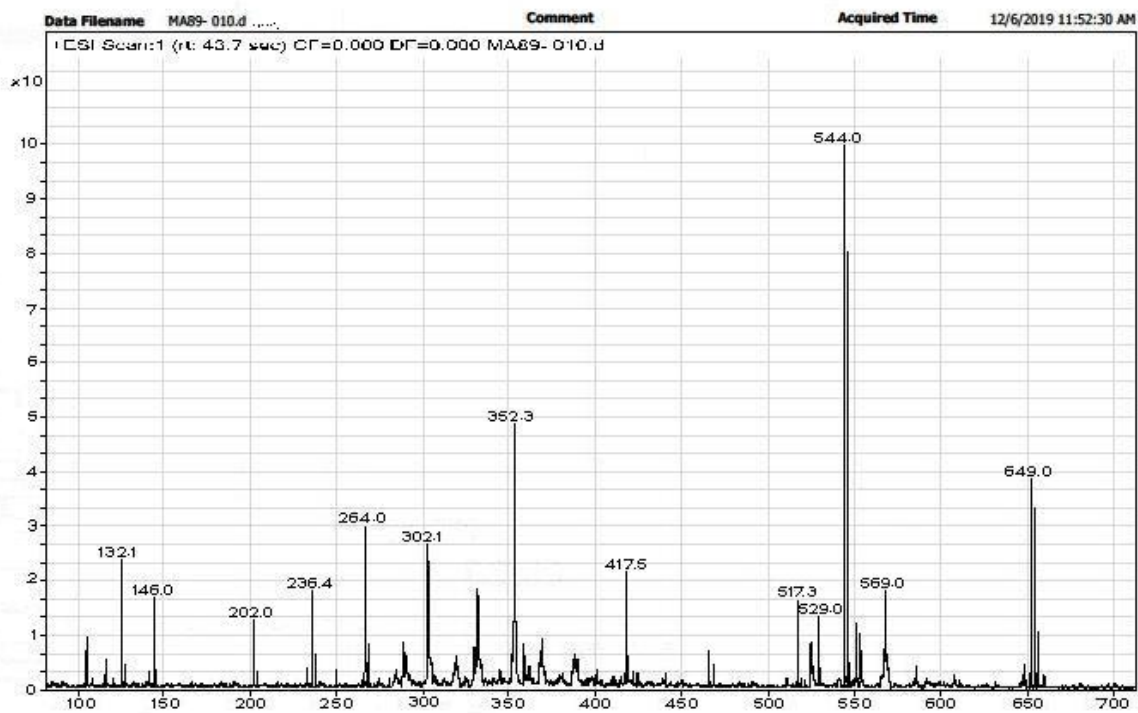

**Figure S63: Mass Spectroscopy of Compound 10f**

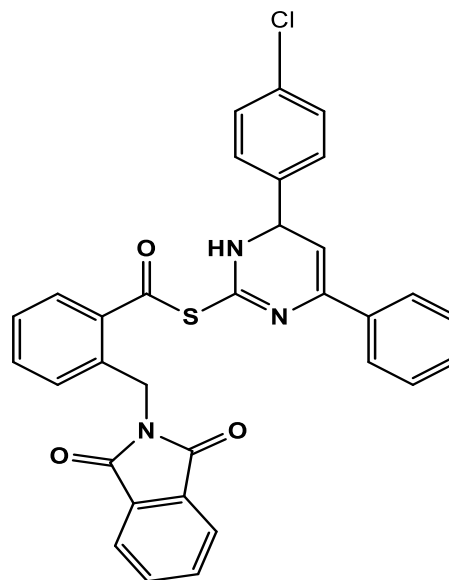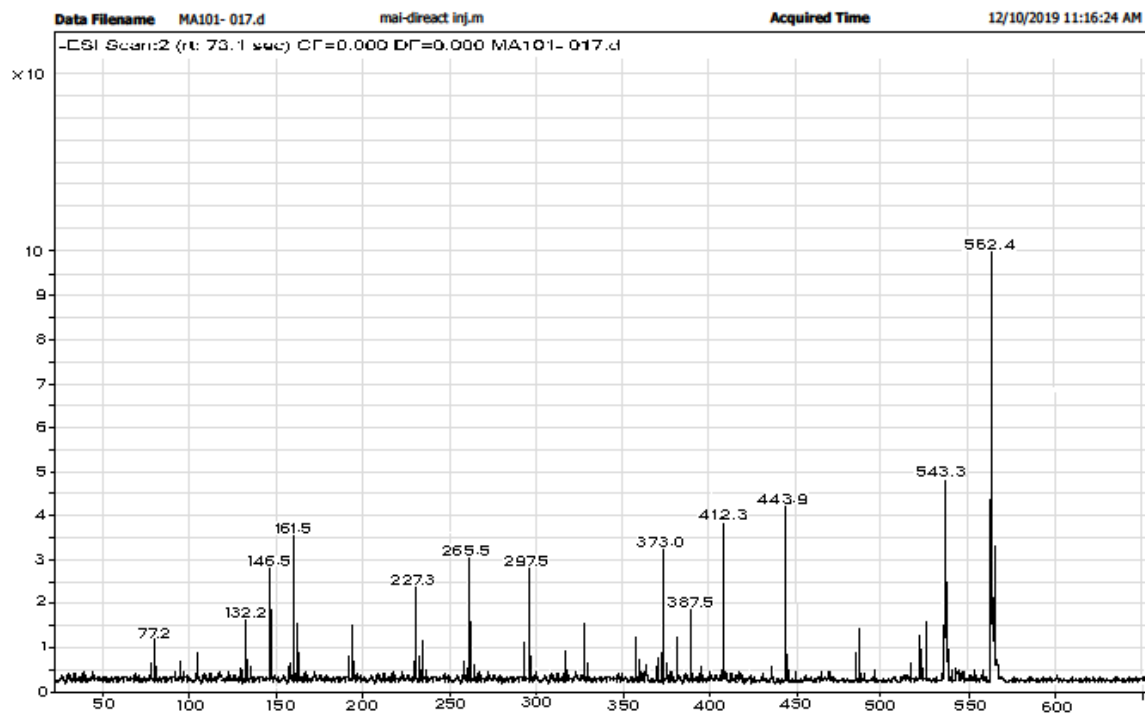

**Figure S64: Mass Spectroscopy of Compound 10g**

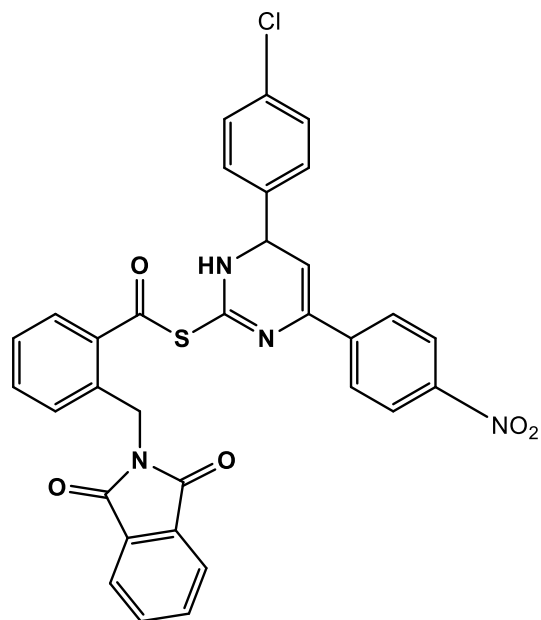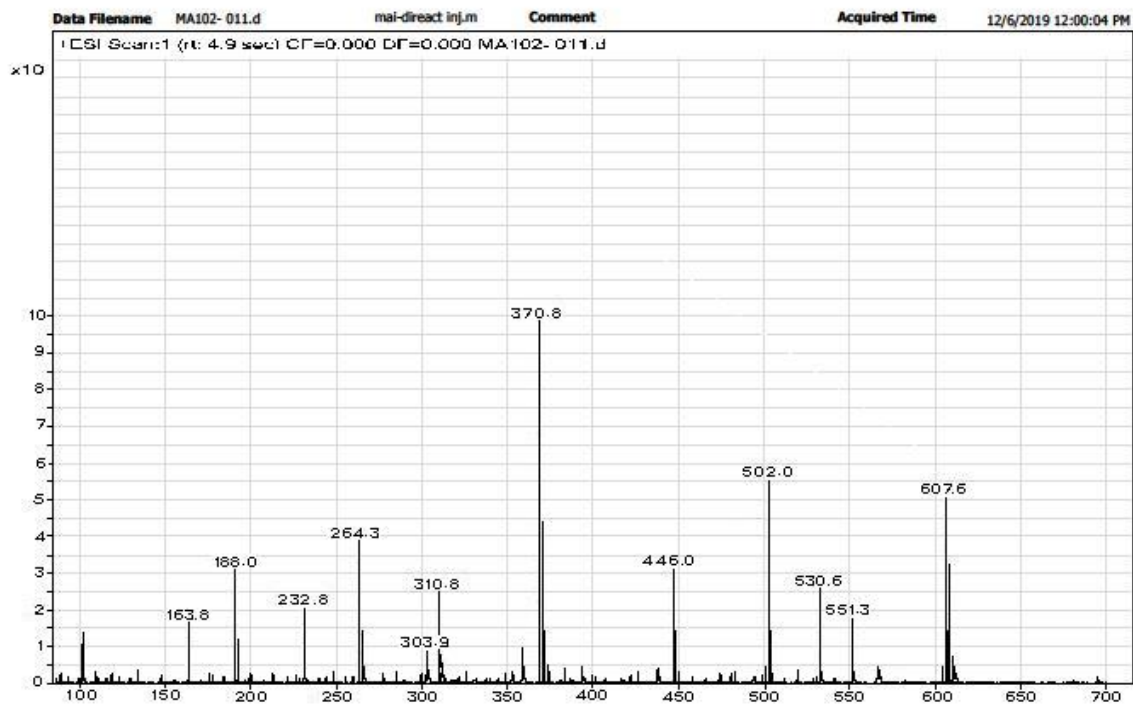



**Figure S65: Mass Spectroscopy of Compound 10h**

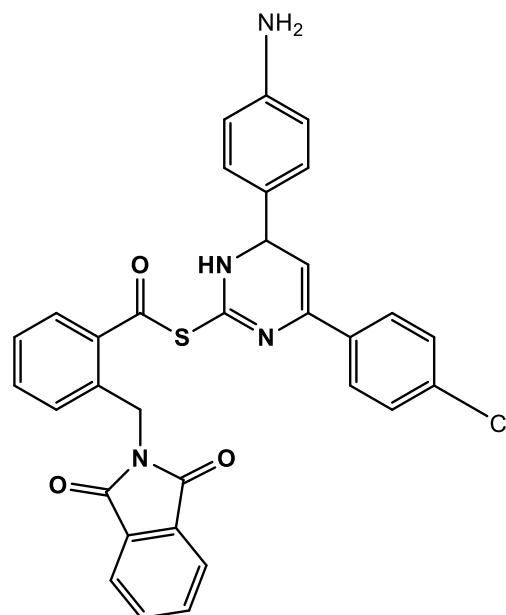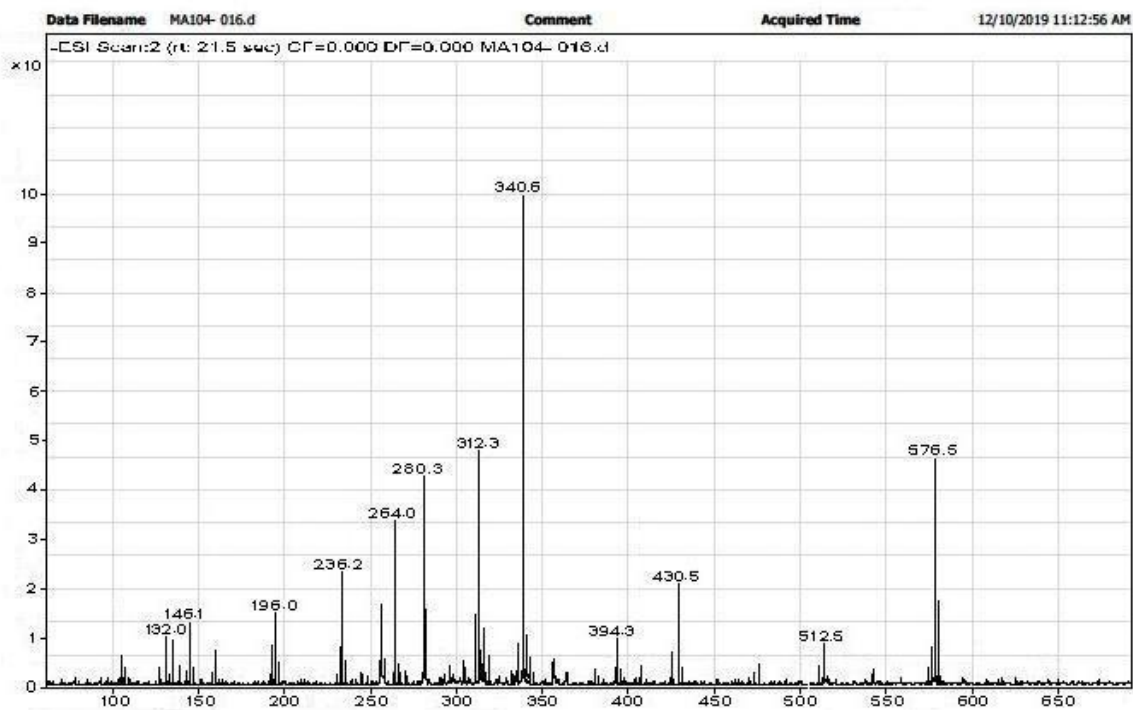

**Figure S66: Mass Spectroscopy of Compound 10i**

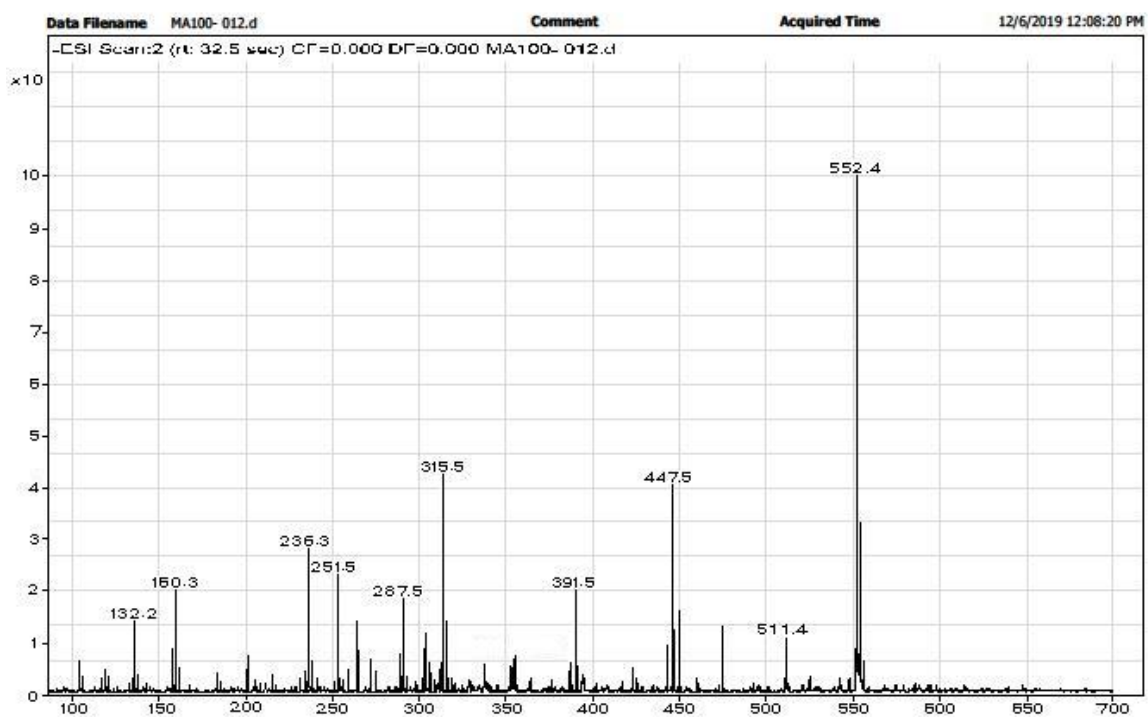

**Figure S67: Mass Spectroscopy of Compound 10j**

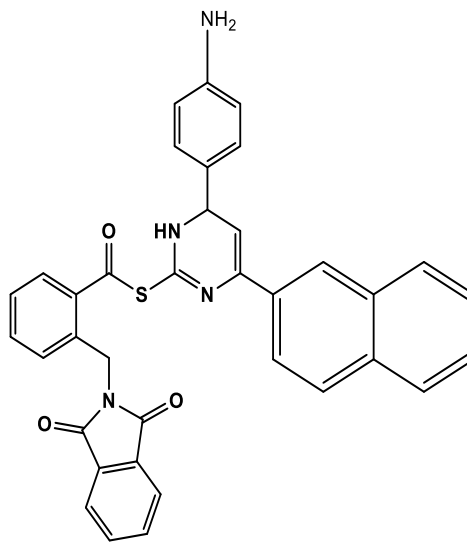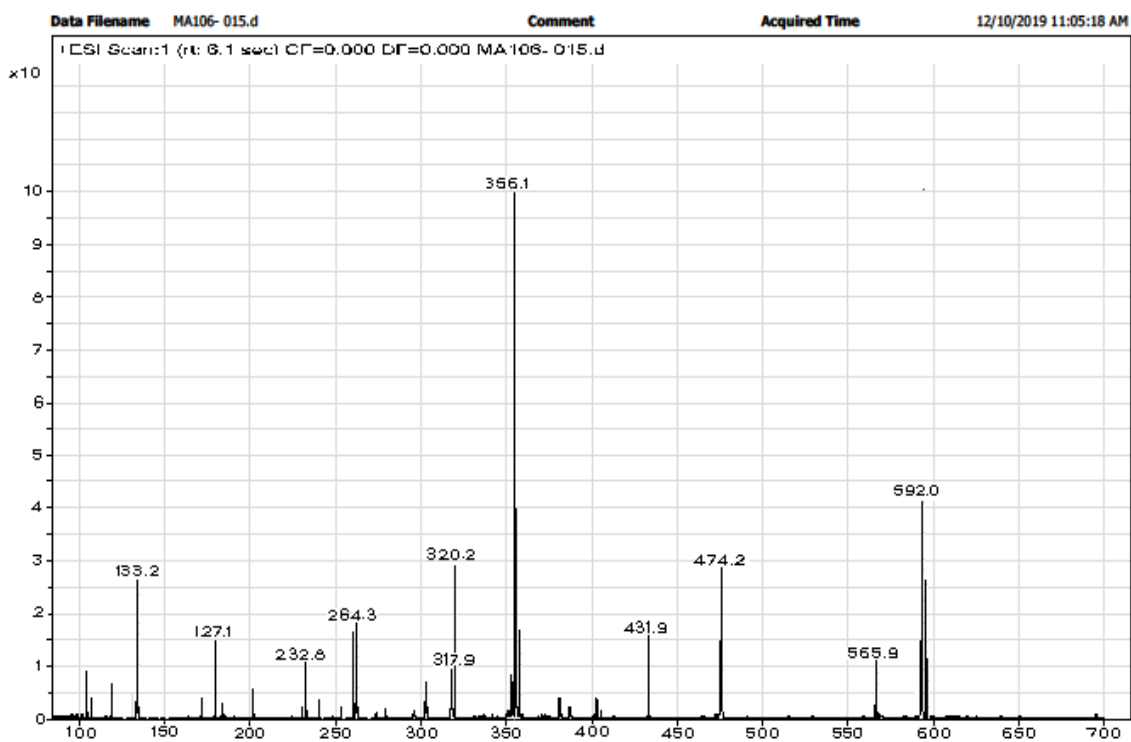

Supplement: pharmaceuticals-14-00144-s001.pdf [file pharmaceuticals-14-00144-s001.pdf]
